# Supplementary material for: Pd(ii)-catalyzed, controllable C–H mono-/diarylation of aryl tetrazoles: concise synthesis of Losartan
Source: Royal Society of Chemistry journal article supplement (doi:10.1039/c4ob02453b), 2015-01-01

## Supporting Information

For

### **Pd-catalyzed, controllable C–H mono-/diarylation of aryl tetrazoles: concise synthesis of losartan**

Yan-Jun Ding, Yan Li,\* Sheng-Yu Dai, Quan Lan and Xi-Sheng Wang\*

*Department of Chemistry, University of Science and Technology of China,*

*96 Jinzhai Road, Hefei, Anhui 230026, China*

#### **Tabel of Contents**

|                                                     |     |
|-----------------------------------------------------|-----|
| <b>General Information</b>                          | S2  |
| <b>Experimental Procedures</b>                      | S3  |
| Screening of amount of AgOAc                        | S3  |
| Preparation of Substrates                           | S3  |
| General Procedure for the Arylation of Tetrazoles   | S7  |
| Total Synthesis of Losartan                         | S14 |
| <b>References</b>                                   | S17 |
| <b><sup>1</sup>H and <sup>13</sup>C NMR Spectra</b> | S18 |

**General information:** NMR spectra were recorded on Bruker-400 (400 MHz for  $^1\text{H}$ ; 100 MHz for  $^{13}\text{C}$ ) instruments internally referenced to  $\text{SiMe}_4$  signal. High resolution mass spectra were recorded on P-SIMS-Gly of Bruker Daltonics Inc. using ESI-TOF (electrospray ionization-time of flight) or Micromass GCT using EI (electron impact). All reagents and solvents were purchased from commercial sources and purified commonly before used.

**Table S1. Screening of the Amount of AgOAc**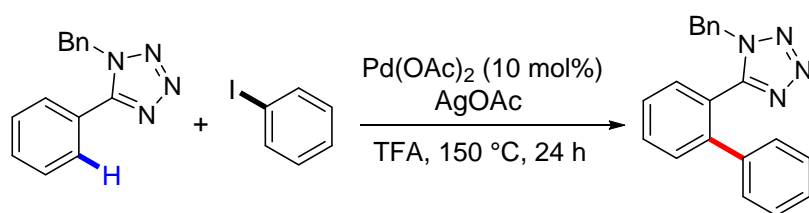

| entry | AgOAc (eq.) | yield (%) <sup>b</sup> |
|-------|-------------|------------------------|
| 1     | 1.5         | 43                     |
| 2     | 2.0         | 67                     |
| 3     | 3.0         | 67                     |
| 4     | 4.0         | 76                     |
| 5     | 5.0         | 70                     |

### Preparation of Substrates

All tetrazoles were synthesized according to the reported method.<sup>[1]</sup> Substrates **1a**, **1c**, **2a**, **2c** were prepared according to the reported procedures.<sup>[2]</sup> All 1-benzyl-5-aryl-1*H*-tetrazoles and 2-benzyl-5-aryl-1*H*-tetrazoles were synthesized according to known procedure.<sup>[3,4]</sup>

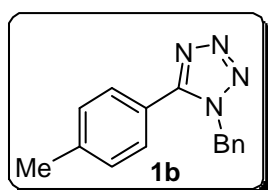

**1b**: <sup>1</sup>H NMR (400 MHz, CDCl<sub>3</sub>) δ 7.48 – 7.46 (m, 2H), 7.35 – 7.31 (m, 3H), 7.29 (d, *J* = 0.4 Hz, 2H), 7.16 – 7.13 (m, 2H), 5.60 (s, 2H), 2.41 (s, 3H). <sup>13</sup>C NMR (100 MHz, CDCl<sub>3</sub>) δ 154.8, 141.9, 134.2, 130.0, 129.7, 129.2, 128.8, 128.8, 127.2, 120.9, 51.4, 21.6. HRMS (ESI) calcd. for C<sub>15</sub>H<sub>15</sub>N<sub>4</sub> ([M+H]<sup>+</sup>): 251.1291, found: 251.1291.

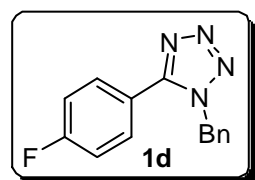

**1d**: <sup>1</sup>H NMR (400 MHz, CDCl<sub>3</sub>) δ 7.60 – 7.55 (m, 2H), 7.38 – 7.34 (m, 3H), 7.20 (m, 2H), 7.14 (m, 2H), 5.61 (s, 2H). <sup>13</sup>C NMR (100 MHz, CDCl<sub>3</sub>) δ 164.4 (d, *J* = 253.1 Hz), 153.9, 133.8, 131.1(d, *J* = 8.9 Hz), 129.3, 128.9, 127.1, 120.0 (d, *J* = 3.5 Hz), 116.6 (d, *J* = 22.2 Hz), 51.5. HRMS (ESI) calcd. for C<sub>14</sub>H<sub>12</sub>FN<sub>4</sub> ([M+H]<sup>+</sup>): 255.1041, found: 255.1036.

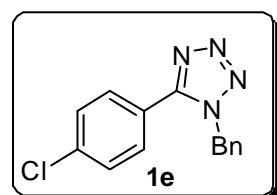

**1e**: <sup>1</sup>H NMR (400 MHz, CDCl<sub>3</sub>) δ 7.53 – 7.51 (m, 2H), 7.48 – 7.46 (m, 2H), 7.37 – 7.34 (m, 3H), 7.15 – 7.12 (m, 2H), 5.61

(s, 2H).  $^{13}\text{C}$  NMR (100 MHz,  $\text{CDCl}_3$ )  $\delta$  153.9, 138.0, 133.8, 130.3, 129.7, 129.4, 129.0, 127.2, 122.3, 51.6. HRMS (ESI) calcd. for  $\text{C}_{14}\text{H}_{12}\text{ClN}_4$  ( $[\text{M}+\text{H}]^+$ ): 271.0745, found: 271.0745.

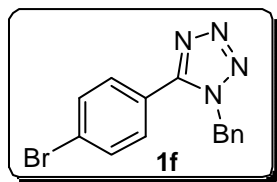

**1f:**  $^1\text{H}$  NMR (400 MHz,  $\text{CDCl}_3$ )  $\delta$  7.66 – 7.63 (m, 2H), 7.47 – 7.43 (m, 2H), 7.37 – 7.34 (m, 3H), 7.15 – 7.13 (m, 2H), 5.61 (s, 1H).  $^{13}\text{C}$  NMR (100 MHz,  $\text{CDCl}_3$ )  $\delta$  154.0, 133.8, 132.7, 130.4, 129.4, 129.1, 127.2, 126.3, 122.8, 51.6. HRMS (ESI)

calcd. for  $\text{C}_{14}\text{H}_{12}\text{BrN}_4$  ( $[\text{M}+\text{H}]^+$ ): 315.0240, found: 315.0237.

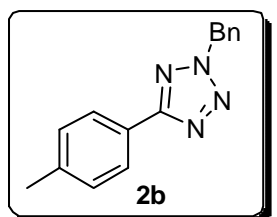

**2b:**  $^1\text{H}$  NMR (400 MHz,  $\text{CDCl}_3$ )  $\delta$  8.04 – 8.02 (m, 2H), 7.43 – 7.35 (m, 5H), 7.29 – 7.26 (m, 2H), 5.79 (s, 2H), 2.40 (s, 1H).  $^{13}\text{C}$  NMR (100 MHz,  $\text{CDCl}_3$ )  $\delta$  165.7, 140.6, 133.6, 129.7, 129.1, 129.0, 128.5, 126.9, 124.7, 56.9, 21.6. HRMS (EI)

calcd. for  $\text{C}_{15}\text{H}_{14}\text{N}_4$  ( $[\text{M}]$ ): 250.1218, found: 250.1220.

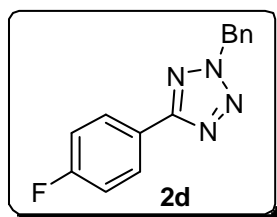

**2d:**  $^1\text{H}$  NMR (400 MHz,  $\text{CDCl}_3$ )  $\delta$  8.15 – 8.10 (m, 2H), 7.40 – 7.35 (m, 5H), 7.18 – 7.12 (m, 2H), 5.79 (s, 2H).  $^{13}\text{C}$  NMR (100 MHz,  $\text{CDCl}_3$ )  $\delta$  164.8, 164.1 (d,  $J = 250.1$  Hz), 133.4, 129.2, 129.1 (d,  $J = 2.8$  Hz), 129.0, 128.5, 123.8 (d,  $J = 3.2$

Hz), 116.1 (d,  $J = 22.0$  Hz), 57.0. HRMS (EI) calcd. for  $\text{C}_{14}\text{H}_{11}\text{FN}_4$  ( $[\text{M}]$ ): 254.0968, found: 270.0986.

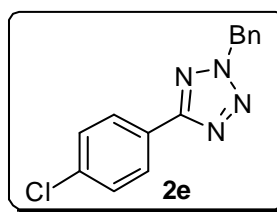

**2e:**  $^1\text{H}$  NMR (400 MHz,  $\text{CDCl}_3$ )  $\delta$  8.09 – 8.06 (m, 2H), 7.43 – 7.36 (m, 7H), 5.79 (s, 2H).  $^{13}\text{C}$  NMR (100 MHz,  $\text{CDCl}_3$ )  $\delta$  164.7, 136.5, 133.4, 129.3, 129.2, 129.2, 128.6, 128.3, 126.0, 57.0. HRMS (EI) calcd. for  $\text{C}_{14}\text{H}_{11}\text{ClN}_4$  ( $[\text{M}]$ ): 270.7169,

found: 270.0688.

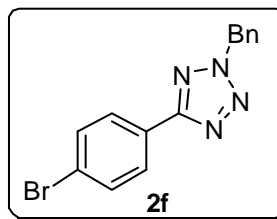

**2f:**  $^1\text{H}$  NMR (400 MHz,  $\text{CDCl}_3$ )  $\delta$  8.02 – 7.99 (m, 2H), 7.62 – 7.59 (m, 2H), 7.41 – 7.34 (m, 5H), 5.80 (s, 2H).  $^{13}\text{C}$  NMR (100 MHz,  $\text{CDCl}_3$ )  $\delta$  164.8, 133.3, 132.2, 129.2, 129.2, 128.6, 128.5, 126.5, 124.8, 57.1. HRMS (EI) calcd. for

$\text{C}_{14}\text{H}_{11}\text{BrN}_4$  ( $[\text{M}]$ ): 314.0617, found: 314.0178.

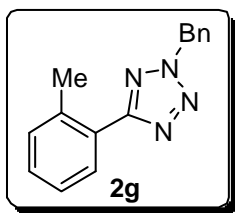

**2g:**  $^1\text{H}$  NMR (400 MHz,  $\text{CDCl}_3$ )  $\delta$  8.01 (dd,  $J = 7.2, 1.6$  Hz, 1H), 7.39 – 7.28 (m, 8H), 5.82 (s, 2H), 2.62 (s, 3H).  $^{13}\text{C}$  NMR (100 MHz,  $\text{CDCl}_3$ )  $\delta$  166.0, 137.6, 133.6, 131.4, 130.0, 129.6, 129.1, 129.0, 128.5, 126.2, 126.1, 56.9, 21.7. HRMS (ESI) calcd. for  $\text{C}_{15}\text{H}_{15}\text{N}_4$  ( $[\text{M}+\text{H}]^+$ ): 251.3059, found: 251.1288.

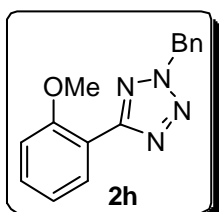

**2h:**  $^1\text{H}$  NMR (400 MHz,  $\text{CDCl}_3$ )  $\delta$  8.01 (dd,  $J = 4.0, 1.6$  Hz, 1H), 7.42 – 7.28 (m, 8H), 5.82 (s, 2H), 2.62 (s, 3H).  $^{13}\text{C}$  NMR (100 MHz,  $\text{CDCl}_3$ )  $\delta$  166.0, 137.6, 133.6, 131.4, 130.0, 129.6, 129.1, 129.0, 128.5, 126.6, 126.1, 56.9, 21.4. HRMS (ESI) calcd. for  $\text{C}_{15}\text{H}_{15}\text{N}_4\text{O}$  ( $[\text{M}+\text{H}]^+$ ): 267.1240, found: 267.1238.

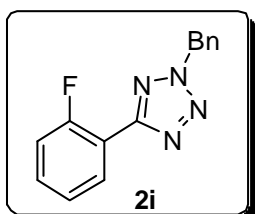

**2i:**  $^1\text{H}$  NMR (400 MHz,  $\text{CDCl}_3$ )  $\delta$  8.11 (td,  $J = 8.0, 4.0$  Hz, 1H), 7.44 – 7.32 (m, 6H), 7.27 – 7.19 (m, 2H), 5.84 (s, 2H).  $^{13}\text{C}$  NMR (100 MHz,  $\text{CDCl}_3$ )  $\delta$  161.7 (d,  $J = 5.2$  Hz), 160.2 (d,  $J = 255.6$  Hz), 133.4, 132.0 (d,  $J = 8.3$  Hz), 130.1 (d,  $J = 2.4$  Hz), 129.1, 129.0, 128.5, 124.5 (d,  $J = 3.8$  Hz), 116.8 (d,  $J = 21.2$  Hz), 115.7 (d,  $J = 12.0$  Hz), 57.0. HRMS (EI) calcd. for  $\text{C}_{14}\text{H}_{11}\text{FN}_4$  ( $[\text{M}]$ ): 254.0968, found: 254.0989.

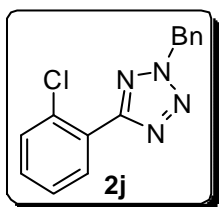

**2j:**  $^1\text{H}$  NMR (400 MHz,  $\text{CDCl}_3$ )  $\delta$  7.94 – 7.91 (m, 1H), 7.54 – 7.51 (m, 1H), 7.45 – 7.34 (m, 7H), 5.85 (s, 2H).  $^{13}\text{C}$  NMR (100 MHz,  $\text{CDCl}_3$ )  $\delta$  163.8, 133.4, 133.3, 130.9, 128.6, 127.0, 126.7, 57.1. HRMS (ESI) calcd. for  $\text{C}_{14}\text{H}_{12}\text{ClN}_4$  ( $[\text{M}+\text{H}]^+$ ): 271.0745, found: 271.0743.

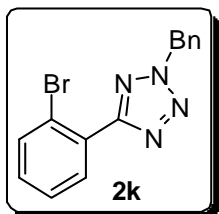

**2k:**  $^1\text{H}$  NMR (400 MHz,  $\text{CDCl}_3$ )  $\delta$  7.83 (dd,  $J = 7.6, 2.0$  Hz, 1H), 7.72 (dd,  $J = 8.0, 1.2$  Hz, 1H), 7.45 – 7.42 (m, 2H), 7.41 – 7.35 (m, 4H), 7.33 – 7.28 (m, 1H), 5.85 (s, 2H).  $^{13}\text{C}$  NMR (100 MHz,  $\text{CDCl}_3$ )  $\delta$  164.5, 134.2, 133.3, 131.8, 131.3, 129.1, 129.1, 128.7, 128.5, 127.5, 122.2, 57.0. HRMS (ESI) calcd. for  $\text{C}_{14}\text{H}_{12}\text{BrN}_4$  ( $[\text{M}+\text{H}]^+$ ): 351.0240, found: 351.0239.

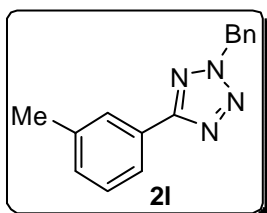

**2l:**  $^1\text{H}$  NMR (400 MHz,  $\text{CDCl}_3$ )  $\delta$  7.97 – 7.93 (m, 2H), 7.43 – 7.34 (m, 6H), 7.27 (d,  $J = 6.4$  Hz, 1H), 5.80 (s, 2H), 2.42 (s,

3H).  $^{13}\text{C}$  NMR (100 MHz,  $\text{CDCl}_3$ )  $\delta$  165.7, 138.7, 133.5, 131.2, 129.1, 129.0, 128.9, 128.4, 127.4, 127.3, 124.1, 56.9, 21.5. HRMS (ESI) calcd. for  $\text{C}_{15}\text{H}_{15}\text{N}_4$  ( $[\text{M}+\text{H}]^+$ ): 251.1291, found: 251.1287.

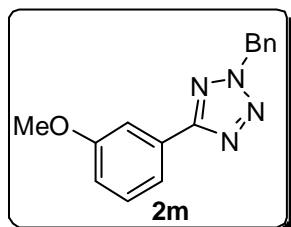

**2m:**  $^1\text{H}$  NMR (400 MHz,  $\text{CDCl}_3$ )  $\delta$  7.73 (d,  $J = 7.6$  Hz, 1H), 7.68 (d,  $J = 1.2$  Hz, 1H), 7.42 – 7.36 (m, 6H), 7.01 – 6.99 (m, 1H), 5.80 (s, 2H), 3.88 (s, 3H).  $^{13}\text{C}$  NMR (100 MHz,  $\text{CDCl}_3$ )  $\delta$  165.5, 160.1, 133.5, 130.1, 129.1, 129.1, 128.7, 128.5, 119.4, 116.9, 111.7, 56.9, 55.5. HRMS (ESI) calcd. for  $\text{C}_{15}\text{H}_{15}\text{N}_4\text{O}$  ( $[\text{M}+\text{H}]^+$ ): 267.1240, found: 267.1234.

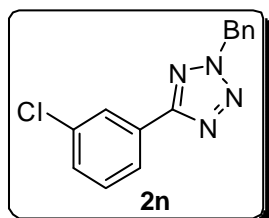

**2n:**  $^1\text{H}$  NMR (400 MHz,  $\text{CDCl}_3$ )  $\delta$  8.14 – 8.13 (m, 1H), 8.03 (dt,  $J = 8.0, 2.0$  Hz, 1H), 7.43 – 7.36 (m, 7H), 5.80 (s, 2H).  $^{13}\text{C}$  NMR (100 MHz,  $\text{CDCl}_3$ )  $\delta$  164.5, 135.0, 133.3, 130.5, 130.3, 128.6, 127.1, 125.1, 57.1. HRMS (ESI) calcd. for  $\text{C}_{14}\text{H}_{12}\text{ClN}_4$  ( $[\text{M}+\text{H}]^+$ ): 271.0745, found: 271.0744.

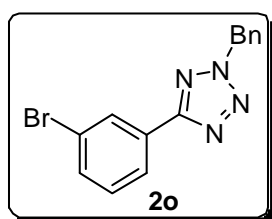

**2o:**  $^1\text{H}$  NMR (400 MHz,  $\text{CDCl}_3$ )  $\delta$  8.29 (d,  $J = 1.2$  Hz, 1H), 8.07 (d,  $J = 7.6$  Hz, 1H), 7.58 (d,  $J = 1.2$  Hz, 1H), 7.41 – 7.32 (m, 6H), 5.80 (s, 2H).  $^{13}\text{C}$  NMR (100 MHz,  $\text{CDCl}_3$ )  $\delta$  164.3, 133.4, 133.3, 130.5, 130.0, 129.2, 128.5, 125.3, 123.1, 57.1. HRMS (ESI) calcd. for  $\text{C}_{14}\text{H}_{12}\text{BrN}_4$  ( $[\text{M}+\text{H}]^+$ ): 315.0240, found: 315.0240.

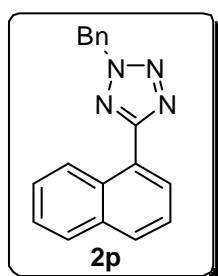

**2p:**  $^1\text{H}$  NMR (400 MHz,  $\text{CDCl}_3$ )  $\delta$  8.89 (dd,  $J = 8.0, 0.4$  Hz, 1H), 7.25 (dd,  $J = 8.0, 1.2$  Hz, 1H), 7.98 (d,  $J = 8.0$  Hz, 1H), 7.92 (d,  $J = 8.0$  Hz, 1H), 7.62 – 7.53 (m, 3H), 7.50 – 7.47 (m, 2H), 7.43 – 7.37 (m, 3H), 5.91 (s, 2H).  $^{13}\text{C}$  NMR (100 MHz,  $\text{CDCl}_3$ )  $\delta$  165.7, 134.1, 133.6, 131.1, 130.7, 129.2, 129.1, 128.7, 128.6, 128.6, 127.4, 126.3, 125.9, 125.3, 124.4, 57.1. HRMS (EI) calcd. for  $\text{C}_{18}\text{H}_{14}\text{N}_4$  ( $[\text{M}]$ ): 286.1218, found: 286.1224.

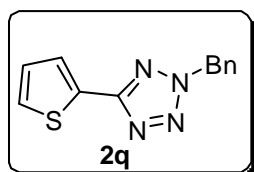

**2q:**  $^1\text{H}$  NMR (400 MHz,  $\text{CDCl}_3$ )  $\delta$  7.79 (dd,  $J = 3.6, 1.2$  Hz, 1H), 7.44 – 7.35 (m, 6H), 7.13 (dd,  $J = 5.2, 3.6$  Hz, 1H), 5.78 (s, 2H).  $^{13}\text{C}$  NMR (100 MHz,  $\text{CDCl}_3$ )  $\delta$  161.6, 133.3, 129.1, 129.1,

128.5, 128.0, 128.0, 56.9. HRMS (ESI) calcd. for C<sub>12</sub>H<sub>11</sub>N<sub>4</sub>S ([M+H]<sup>+</sup>): 243.0699, found: 243.0693.

### General procedure for the Pd(II)-catalyzed arylation of 1-benzyl-5-aryl-1*H*-tetrazole or 2-benzyl-5-aryl-2*H*-tetrazole

To a 25 mL sealed tube was added 1-benzyl-5-aryl-1*H*-tetrazole or 2-benzyl-5-aryl-2*H*-tetrazole (0.2 mmol), Pd(OAc)<sub>2</sub> (5-15 mol%), aryl iodide **3** (2.0 mmol, 10 equiv), and AgOAc (133.5 mg, 0.8 mmol, 4 equiv). TFA (0.2 mL) was then added and the reaction mixture was heated to 150 °C for 24 hours. The resulting mixture was cooled down to room temperature, filtered through a pad of celite, and the celite was rinsed with copious EtOAc, then washed with H<sub>2</sub>O. The phases were separated and the aqueous phase was extracted with EtOAc (3 times). The organic layers were combined, washed with brine, dried over anhydrous Na<sub>2</sub>SO<sub>4</sub>. The filtrate was concentrated under reduced pressure and the residue was purified by column chromatography on silica gel (eluent: petroleum ether/EtOAc) to afford the corresponding arylated product.

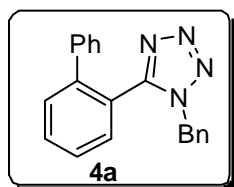

**4a:** <sup>1</sup>H NMR (400 MHz, CDCl<sub>3</sub>) δ 7.64 (td, J = 8.0, 0.6 Hz, 1H), 7.60 – 7.58 (m, 1H), 7.43 (td, J = 8.0, 1.2 Hz, 1H), 7.35 (dd, J = 4.0, 0.8 Hz, 1H), 7.32 – 7.27 (m, 3H), 7.22 – 7.13 (m, 5H), 6.76 (d, J = 4.0 Hz, 2H), 4.75 (s, 2H). <sup>13</sup>C NMR (100 MHz, CDCl<sub>3</sub>) δ 154.8, 141.8, 139.0, 133.3, 131.7, 131.4, 130.4, 129.1, 128.9, 128.8, 128.7, 128.3, 128.0, 128.0, 122.9, 51.0. HRMS (EI) calcd. for C<sub>20</sub>H<sub>16</sub>N<sub>4</sub> ([M]): 321.1375, found: 321.1375

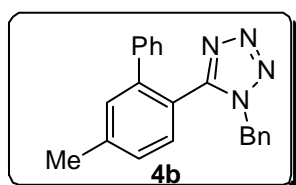

**4b:** <sup>1</sup>H NMR (400 MHz, CDCl<sub>3</sub>) δ 7.40 (s, 1H), 7.30 – 7.26 (m, 5H), 7.24 – 7.13 (m, 5H), 6.77 (d, J = 8.0 Hz, 2H), 4.74 (s, 2H), 2.49 (s, 3H). <sup>13</sup>C NMR (100 MHz, CDCl<sub>3</sub>) δ 154.9, 142.0, 141.6, 139.2, 133.4, 131.3, 131.1, 129.0, 128.8, 128.7, 128.7, 128.6, 128.1, 127.9, 119.8, 50.8, 21.6. HRMS (EI) calcd. for C<sub>21</sub>H<sub>18</sub>N<sub>4</sub> ([M]): 326.1531, found: 326.1531

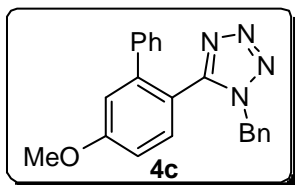

**4c:**  $^1\text{H}$  NMR (400 MHz,  $\text{CDCl}_3$ )  $\delta$  7.32 – 7.27 (m, 4H), 7.20 – 7.17 (m, 5H), 7.08 (d,  $J = 4.0$  Hz, 1H), 6.95 (dd,  $J = 8.0$ , 4.0 Hz, 1H), 6.79 – 6.77 (m, 2H), 4.74 (s, 2H), 3.91 (s, 3H).

$^{13}\text{C}$  NMR (100 MHz,  $\text{CDCl}_3$ )  $\delta$  162.0, 154.7, 143.4, 139.0,

133.4, 132.9, 133.1, 129.1, 128.8, 128.7, 128.6, 128.3, 127.9, 115.9, 114.8, 113.5, 55.7, 50.8. HRMS (EI) calcd. for  $\text{C}_{21}\text{H}_{18}\text{N}_4\text{O}$  ([M]): 342.1481, found: 342.2150.

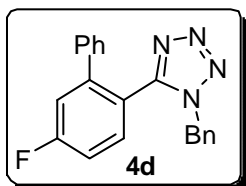

**4d:**  $^1\text{H}$  NMR (400 MHz,  $\text{CDCl}_3$ )  $\delta$  7.34 – 7.27 (m, 5H), 7.21 – 7.09 (m, 6H), 6.76 (dd,  $J = 8.0$ , 1.6 Hz, 2H), 4.75 (s, 2H).  $^{13}\text{C}$  NMR (100 MHz,  $\text{CDCl}_3$ )  $\delta$  164.5 (d,  $J = 252.8$  Hz), 154.0, 144.4 (d,  $J = 8.5$  Hz), 137.9 (d,  $J = 1.6$  Hz), 133.5 (d,  $J = 9.1$

Hz), 133.1, 129.3, 128.9, 128.8 (2C), 128.6, 127.9, 118.9 (d,  $J = 3.3$  Hz), 117.4 (d,  $J = 22.5$  Hz), 115.2 (d,  $J = 21.9$  Hz), 51.0. HRMS (EI) calcd. for  $\text{C}_{20}\text{H}_{15}\text{FN}_4$  ([M]): 330.3581, found: 330.1280.

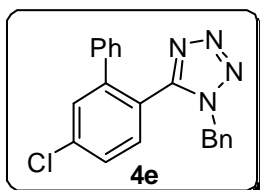

**4e:**  $^1\text{H}$  NMR (400 MHz,  $\text{CDCl}_3$ )  $\delta$  7.56 (d,  $J = 2.0$ , Hz, 1H), 7.37 (dd,  $J = 8.0$ , 4.0 Hz, 1H), 7.33 – 7.26 (m, 3H), 7.24 (d,  $J = 1.2$  Hz, 1H), 7.20 – 7.10 (m, 5H), 6.76 – 6.73 (m, 2H), 4.74 (s, 2H).  $^{13}\text{C}$  NMR (100 MHz,  $\text{CDCl}_3$ )  $\delta$  153.9, 143.4, 137.9,

137.7, 133.1, 132.7, 130.5, 129.3, 128.9, 128.8, 128.6, 128.1, 127.9, 121.4, 51.0. HRMS (EI) calcd. for  $\text{C}_{20}\text{H}_{15}\text{ClN}_4$  ([M]): 346.0985, found: 346.0956.

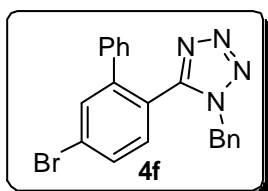

**4f:**  $^1\text{H}$  NMR (400 MHz,  $\text{CDCl}_3$ )  $\delta$  7.74 (d,  $J = 4.0$ , Hz, 1H), 7.55 (dd,  $J = 8.0$ , 4.0 Hz, 1H), 7.32 – 7.28 (m, 3H), 7.19 – 7.11 (m, 6H), 6.77 – 6.75 (m, 2H), 4.76 (s, 2H).  $^{13}\text{C}$  NMR (100 MHz,  $\text{CDCl}_3$ )  $\delta$  153.9, 143.9, 137.5, 133.3, 133.0, 132.6, 131.0, 129.2,

128.8, 128.7, 128.5, 127.8, 50.9. HRMS (EI) calcd. for  $\text{C}_{20}\text{H}_{15}\text{BrN}_4$  ([M]): 390.0480, found: 390.0443.

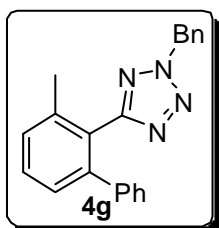

**4g:**  $^1\text{H}$  NMR (400 MHz,  $\text{CDCl}_3$ )  $\delta$  7.43 (t,  $J = 8.0$  Hz, 1H), 7.33 – 7.27 (m, 5H), 7.16 – 7.11 (m, 2H), 7.10 – 7.03 (m, 6H), 5.68 (s, 2H), 2.20 (s, 3H).  $^{13}\text{C}$  NMR (100 MHz,  $\text{CDCl}_3$ )  $\delta$  164.6, 143.6, 141.0, 138.7, 133.7, 129.9, 129.2, 129.0, 128.7, 127.9, 127.9,



127.6, 126.8, 126.6, 56.6, 20.5. HRMS (EI) calcd. for C<sub>21</sub>H<sub>18</sub>N<sub>4</sub>([M]): 326.1531, found: 326.1523.

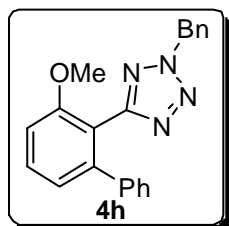

**4h:** <sup>1</sup>H NMR (400 MHz, CDCl<sub>3</sub>) δ 7.50 (dd, *J* = 8.4, 8.0 Hz, 1H), 7.34 – 7.27 (m, 3H), 7.14 – 7.09 (m, 1H), 7.09 – 7.04 (m, 7H), 7.00 (dd, *J* = 8.0, 4.0 Hz, 1H), 5.70 (s, 2H), 3.80 (s, 3H). <sup>13</sup>C NMR (100 MHz, CDCl<sub>3</sub>) δ 162.3, 158.7, 144.9, 140.2, 133.8, 131.2, 129.2, 129.2, 128.9, 128.6, 127.9, 127.8, 127.0, 122.4, 116.2, 110.0, 56.5, 56.2.

HRMS (EI) calcd. for C<sub>21</sub>H<sub>18</sub>N<sub>4</sub>O([M]): 342.1481, found: 342.1477.

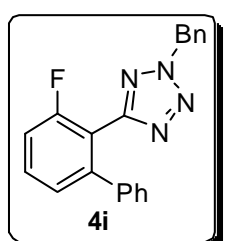

**4i:** <sup>1</sup>H NMR (400 MHz, CDCl<sub>3</sub>) δ 7.55 – 7.49 (m, 1H), 7.34 – 7.29 (m, 3H), 7.27 – 7.25 (m, 1H), 7.22 – 7.18 (m, 2H), 7.16 – 7.12 (m, 4H), 7.08 – 7.05 (m, 2H), 5.71 (s, 2H). <sup>13</sup>C NMR (100 MHz, CDCl<sub>3</sub>) δ 161.3 (d, *J* = 251.0 Hz), 160.3, 145.3 (d, *J* = 1.9 Hz), 139.3 (d, *J* = 2.5 Hz), 133.5, 131.6 (d, *J* = 9.1 Hz), 129.2, 129.0,

128.8, 128.2, 128.0, 127.5, 125.9 (d, *J* = 3.3 Hz), 115.4 (d, *J* = 15.3 Hz), 114.7 (d, *J* = 21.8 Hz), 56.7. HRMS (EI) calcd. for C<sub>20</sub>H<sub>15</sub>FN<sub>4</sub> ([M]): 330.1281, found: 330.1280.

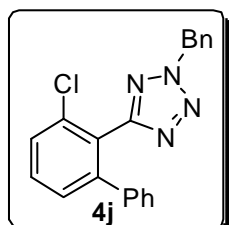

**4j:** <sup>1</sup>H NMR (400 MHz, CDCl<sub>3</sub>) δ 7.53 – 7.46 (m, 2H), 7.36 (dd, *J* = 8.0, 1.6 Hz, 1H), 7.34 – 7.28 (m, 3H), 7.18 – 7.14 (m, 1H), 7.10 – 7.03 (m, 6H), 5.72 (s, 2H). <sup>13</sup>C NMR (100 MHz, CDCl<sub>3</sub>) δ 162.8, 145.5, 139.6, 135.5, 133.6, 131.1, 129.1, 129.0, 128.8,

128.6, 128.5, 128.1, 127.8, 127.4, 126.5, 56.7. HRMS (EI) calcd. for C<sub>20</sub>H<sub>15</sub>ClN<sub>4</sub>([M]): 346.0985, found: 346.0962.

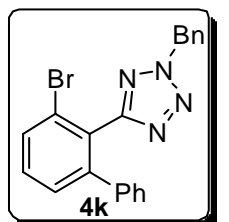

**4k:** <sup>1</sup>H NMR (400 MHz, CDCl<sub>3</sub>) δ 7.69 (dt, *J* = 12.0, 4.0 Hz, 1H), 7.43 – 7.38 (m, 2H), 7.33 – 7.28 (m, 3H), 7.17 – 7.13 (m, 1H), 7.11 – 7.03 (m, 5H), 5.72 (s, 2H). <sup>13</sup>C NMR (100 MHz, CDCl<sub>3</sub>) δ 164.0, 145.7, 139.7, 133.6, 131.8, 131.3, 129.1, 129.1, 128.8, 128.5, 128.1,

127.8, 127.5, 125.1, 56.7. HRMS (EI) calcd. for C<sub>20</sub>H<sub>15</sub>BrN<sub>4</sub>([M]): 390.0480, found: 390.0485.

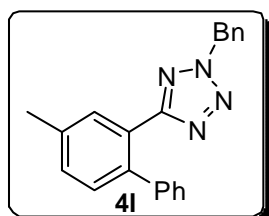

**4l:** <sup>1</sup>H NMR (400 MHz, CDCl<sub>3</sub>) δ 7.67 (d, *J* = 4.0 Hz, 1H), 7.34 – 7.31 (m, 5H), 7.24 – 7.16 (m, 5H), 7.14 – 7.11 (m, 2H),

5.62 (s, 2H), 2.45 (s, 3H).  $^{13}\text{C}$  NMR (100 MHz,  $\text{CDCl}_3$ )  $\delta$  165.8, 141.0, 139.5, 137.4, 133.5, 131.0, 130.9, 130.8, 129.3, 129.0, 128.8, 128.3, 128.0, 126.9, 126.1, 56.6, 21.1. HRMS (EI) calcd. for  $\text{C}_{21}\text{H}_{18}\text{N}_4$  ([M]): 326.1531, found: 326.1526.

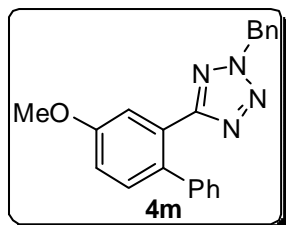

**4m:**  $^1\text{H}$  NMR (400 MHz,  $\text{CDCl}_3$ )  $\delta$  7.40 (d,  $J = 2.8$  Hz, 1H), 7.37 – 7.29 (m, 4H), 7.24 – 7.16 (m, 5H), 7.12 – 7.16 (m, 3H), 5.62 (s, 2H), 3.89 (s, 3H).  $^{13}\text{C}$  NMR (100 MHz,  $\text{CDCl}_3$ )  $\delta$  159.0, 140.7, 134.9, 133.4, 132.1, 129.4, 129.0, 128.8, 128.3,

128.0, 127.2, 126.7, 116.5, 115.0, 56.6, 55.7. HRMS (EI) calcd. for  $\text{C}_{21}\text{H}_{18}\text{N}_4\text{O}$  ([M]): 342.1481, found: 324.1499.

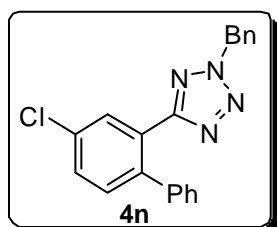

**4n:**  $^1\text{H}$  NMR (400 MHz,  $\text{CDCl}_3$ )  $\delta$  7.88 (d,  $J = 4.0$  Hz, 1H), 7.49 (dd,  $J = 8.0, 2.0$  Hz, 1H), 7.38 – 7.31 (m, 4H), 7.27 – 7.25 (m, 1H), 7.24 – 7.16 (m, 4H), 7.12 – 7.09 (m, 2H), 5.62 (s, 2H).  $^{13}\text{C}$  NMR (100 MHz,  $\text{CDCl}_3$ )  $\delta$  164.6, 140.7, 139.9,

133.6, 133.3, 132.2, 130.3, 130.1, 129.2, 129.0, 128.9, 128.4, 128.2, 127.9, 127.4, 56.8. HRMS (EI) calcd. for  $\text{C}_{20}\text{H}_{15}\text{ClN}_4$  ([M]): 346.0985, found: 346.0987.

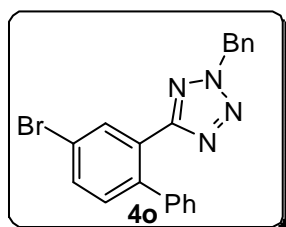

**4o:**  $^1\text{H}$  NMR (400 MHz,  $\text{CDCl}_3$ )  $\delta$  8.02 (d,  $J = 4.0$  Hz, 1H), 7.64 (dd,  $J = 8.0, 2.4$  Hz, 1H), 7.35 – 7.28 (m, 4H), 7.26 – 7.25 (m, 1H), 7.23 – 7.16 (m, 4H), 7.12 – 7.09 (m, 1H), 5.62 (s, 2H).  $^{13}\text{C}$  NMR (100 MHz,  $\text{CDCl}_3$ )  $\delta$  164.5, 141.2, 139.9,

133.3, 133.2, 133.1, 132.4, 129.1, 129.0, 128.9, 128.4, 128.2, 128.2, 127.4, 121.5, 56.8. HRMS (EI) calcd. for  $\text{C}_{20}\text{H}_{15}\text{BrN}_4$  ([M]): 390.0480, found: 390.0472.

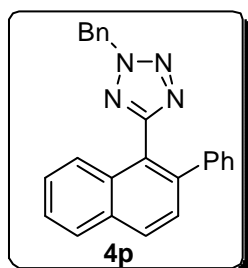

**4p:**  $^1\text{H}$  NMR (400 MHz,  $\text{CDCl}_3$ )  $\delta$  8.04 (d,  $J = 8.0$  Hz, 1H), 7.95 – 7.93 (m, 1H), 7.61 – 7.57 (m, 2H), 7.55 – 7.46 (m, 2H), 7.36 – 7.30 (m, 3H), 7.21 – 7.13 (m, 7H), 5.75 (s, 2H).  $^{13}\text{C}$  NMR (100 MHz,  $\text{CDCl}_3$ )  $\delta$  164.0, 141.7, 141.0, 133.7, 132.9, 132.6, 130.4, 129.6, 129.0, 128.8, 128.2, 128.1, 128.0, 127.9, 127.4, 127.0,

126.3, 125.6, 123.3, 56.7. HRMS (EI) calcd. for  $\text{C}_{24}\text{H}_{18}\text{N}_4$  ([M]): 362.1531, found: 362.1543.

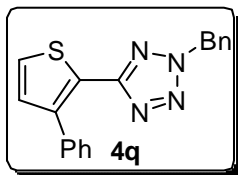

**4q:**  $^1\text{H}$  NMR (400 MHz,  $\text{CDCl}_3$ )  $\delta$  8.09 (d,  $J = 4.0$  Hz, 1H), 7.64 – 7.62 (m, 2H), 7.54 (d,  $J = 1.6$  Hz, 1H), 7.44 – 7.37 (m, 7H), 7.35 – 7.30 (m, 1H), 5.80 (s, 2H), 3.80 (s, 3H).  $^{13}\text{C}$  NMR (100 MHz,  $\text{CDCl}_3$ )  $\delta$  161.6, 143.3, 135.2, 133.3, 129.8, 129.2, 129.2, 129.1, 128.6, 127.7, 127.0, 126.5, 122.7, 57.0. HRMS (EI) calcd. for  $\text{C}_{18}\text{H}_{14}\text{N}_4\text{S}$  ([M]): 318.0939, found: 318.0927.

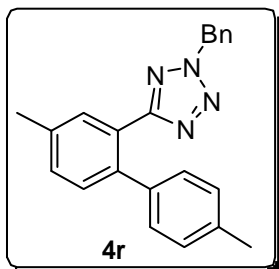

**4r:**  $^1\text{H}$  NMR (400 MHz,  $\text{CDCl}_3$ )  $\delta$  7.46 (d,  $J = 0.4$  Hz, 1H), 7.35 – 7.30 (m, 5H), 7.20 – 7.18 (m, 2H), 7.00 (s, 4H), 5.64 (s, 2H), 2.44 (s, 3H), 2.34 (s, 3H).  $^{13}\text{C}$  NMR (100 MHz,  $\text{CDCl}_3$ )  $\delta$  166.0, 139.4, 138.0, 137.2, 136.3, 133.6, 131.1, 130.9, 130.8, 129.2, 128.9, 128.8, 128.3, 126.1, 56.6, 21.3, 21.1.

HRMS (EI) calcd. for  $\text{C}_{22}\text{H}_{20}\text{N}_4$  ([M]): 340.1688, found: 340.1680.

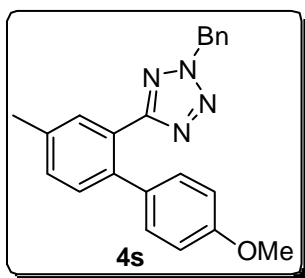

**4s:**  $^1\text{H}$  NMR (400 MHz,  $\text{CDCl}_3$ )  $\delta$  7.63 (s, 1H), 7.34 – 7.31 (m, 5H), 7.20 – 7.18 (m, 2H), 7.03 (d,  $J = 8.0$  Hz, 2H), 6.73 (d,  $J = 8.0$  Hz, 2H), 5.64 (s, 2H), 3.80 (s, 3H), 2.43 (s, 3H).  $^{13}\text{C}$  NMR (100 MHz,  $\text{CDCl}_3$ )  $\delta$  166.0, 158.7, 139.2, 137.1, 133.5, 133.4, 131.1, 130.9, 130.8, 130.4, 129.0, 128.8,

128.4, 126.1, 113.5, 56.6, 55.3, 21.1. HRMS (EI) calcd. for  $\text{C}_{22}\text{H}_{20}\text{N}_4\text{O}$  ([M]): 356.1637, found: 356.1616.

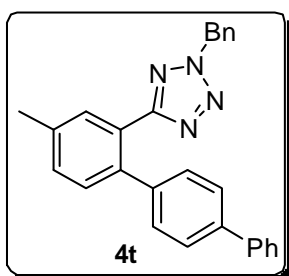

**4t:**  $^1\text{H}$  NMR (400 MHz,  $\text{CDCl}_3$ )  $\delta$  7.72 (m, 1H), 7.62 – 7.60 (m, 2H), 7.49 – 7.43 (m, 4H), 7.41 – 7.34 (m, 3H), 7.21 – 7.16 (m, 7H), 5.63 (s, 2H), 2.47 (s, 3H).  $^{13}\text{C}$  NMR (100 MHz,  $\text{CDCl}_3$ )  $\delta$  165.8, 140.9, 139.9, 139.5, 139.0, 137.5, 133.4, 131.1, 131.0, 130.8, 129.7, 128.9, 128.9, 128.8, 128.3, 127.4,

127.1, 126.7, 126.1, 56.6, 21.1. HRMS (EI) calcd. for  $\text{C}_{27}\text{H}_{22}\text{N}_4\text{O}$  ([M]): 402.1844, found: 402.1838.

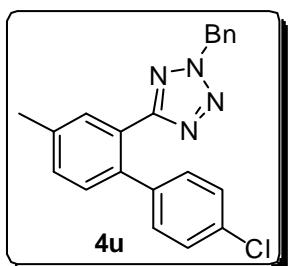

**4u:**  $^1\text{H}$  NMR (400 MHz,  $\text{CDCl}_3$ )  $\delta$  7.68 (d,  $J = 4.0$  Hz, 1H), 7.36 – 7.29 (m, 4H), 7.24 (d,  $J = 4.0$  Hz, 1H), 7.17 – 7.15 (m, 2H), 7.13 – 7.09 (m, 2H), 7.01 – 6.97 (m, 2H), 5.60 (s, 2H),

2.42 (s, 3H).  $^{13}\text{C}$  NMR (100 MHz,  $\text{CDCl}_3$ )  $\delta$  165.6, 139.5, 138.1, 137.9, 133.3, 132.9, 131.1, 131.0, 130.7, 130.6, 129.0, 128.5, 128.2, 126.0, 56.8, 21.1. HRMS (EI) calcd. for  $\text{C}_{21}\text{H}_{17}\text{ClN}_4$  ( $[\text{M}]$ ): 360.1142, found: 360.1135.

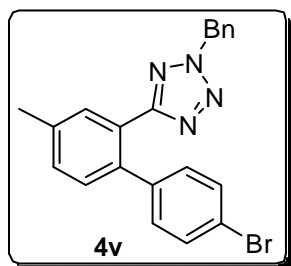

**4v:**  $^1\text{H}$  NMR (400 MHz,  $\text{CDCl}_3$ )  $\delta$  7.66 (s, 1H), 7.35 – 7.31 (m, 3H), 7.29 – 7.22 (m, 4H), 7.16 – 7.13 (m, 2H), 6.93 – 6.90 (m, 2H), 5.58 (s, 2H), 2.40 (s, 3H).  $^{13}\text{C}$  NMR (100 MHz,  $\text{CDCl}_3$ )  $\delta$  165.5, 139.9, 138.1, 137.9, 133.3, 131.1, 131.1, 131.0, 131.0, 130.6, 129.0, 129.0, 128.4, 125.9, 121.1, 56.7,

21.1. HRMS (EI) calcd. for  $\text{C}_{21}\text{H}_{17}\text{BrN}_4$  ( $[\text{M}]$ ): 404.0637, found: 404.0630.

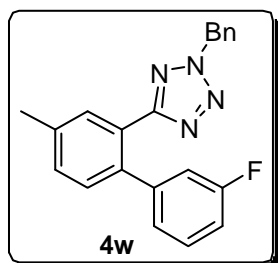

**4w:**  $^1\text{H}$  NMR (400 MHz,  $\text{CDCl}_3$ )  $\delta$  7.70 (m, 1H), 7.35 – 7.26 (m, 5H), 7.20 – 7.18 (m, 2H), 7.18 – 7.11 (m, 1H), 6.95 – 6.90 (m, 1H), 6.88 – 6.83 (m, 2H), 5.64 (s, 2H), 2.45 (s, 3H).  $^{13}\text{C}$  NMR (100 MHz,  $\text{CDCl}_3$ )  $\delta$  165.5, 162.5 (d,  $J = 245.5$  Hz), 143.2 (d,  $J = 8.0$  Hz), 138.1 (d,  $J = 2.0$  Hz), 138.0, 133.4,

131.0 (2C), 130.6, 129.5 (d,  $J = 8.4$  Hz), 129.0, 128.9, 128.3, 126.0, 125.1 (d,  $J = 2.9$  Hz), 116.4 (d,  $J = 21.7$  Hz), 113.8 (d,  $J = 21.0$  Hz), 56.7, 21.1. HRMS (EI) calcd. for  $\text{C}_{21}\text{H}_{17}\text{FN}_4$  ( $[\text{M}]$ ): 344.1437, found: 344.1437.

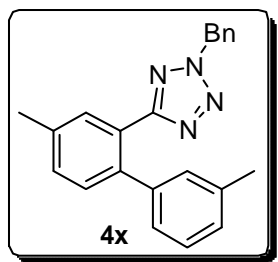

**4x:**  $^1\text{H}$  NMR (400 MHz,  $\text{CDCl}_3$ )  $\delta$  7.65 (s, 1H), 7.34 – 7.29 (m, 5H), 7.19 – 7.16 (m, 2H), 7.10 – 7.03 (m, 2H), 6.95 (s, 1H), 6.90 (d,  $J = 8.0$  Hz, 2H), 5.64 (s, 2H), 2.44 (s, 3H), 2.22 (s, 3H).  $^{13}\text{C}$  NMR (100 MHz,  $\text{CDCl}_3$ )  $\delta$  165.9, 140.8, 139.6, 137.6, 137.3, 133.5, 131.0, 130.8, 130.8, 130.0, 129.0, 128.8,

128.3, 127.9, 127.6, 126.4, 126.1, 56.6, 21.5, 21.1. HRMS (EI) calcd. for  $\text{C}_{22}\text{H}_{20}\text{N}_4$  ( $[\text{M}]$ ): 340.1688, found: 340.1679.

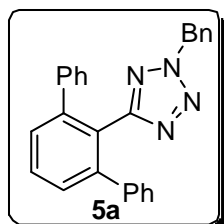

**5a:**  $^1\text{H}$  NMR (400 MHz,  $\text{CDCl}_3$ )  $\delta$  7.59 (dd,  $J = 8.0, 7.2$  Hz, 1H), 7.46 – 7.44 (m, 2H), 7.32 – 7.24 (m, 3H), 7.20 – 7.11 (m, 10H), 6.92 (dd,  $J = 12.0, 4.0$  Hz, 2H), 5.55 (s, 2H).  $^{13}\text{C}$  NMR (100 MHz,  $\text{CDCl}_3$ )  $\delta$  164.4, 143.9, 140.6, 133.8, 129.9, 129.4, 129.2, 128.9,

128.6, 128.0, 127.7, 127.0, 125.8, 56.4. HRMS (EI) calcd. for  $\text{C}_{26}\text{H}_{20}\text{N}_4$  ( $[\text{M}]$ ): 388.1688, found: 388.1682.

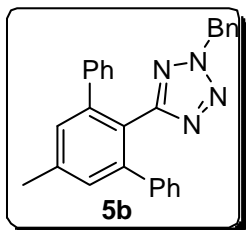

**5b:**  $^1\text{H}$  NMR (400 MHz,  $\text{CDCl}_3$ )  $\delta$  7.32 – 7.23 (m, 5H), 7.19 – 7.11 (m, 10H), 6.90 (dd,  $J = 8.0, 4.0$  Hz, 2H), 5.55 (s, 2H), 2.49 (s, 3H).  $^{13}\text{C}$  NMR (100 MHz,  $\text{CDCl}_3$ )  $\delta$  164.4, 143.7, 140.8, 139.9, 133.8, 133.8, 130.0, 129.4, 128.9, 128.5, 127.9, 127.6, 126.9, 123.0, 56.3, 21.5. HRMS (EI) calcd. for  $\text{C}_{27}\text{H}_{22}\text{N}_4$  ( $[\text{M}]$ ): 402.1844, found: 402.1852.

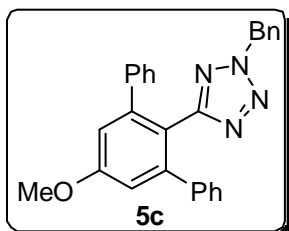

**5c:**  $^1\text{H}$  NMR (400 MHz,  $\text{CDCl}_3$ )  $\delta$  7.30 – 7.27 (m, 2H), 7.25 – 7.23 (m, 1H), 7.20 – 7.13 (m, 10H), 6.99 (s, 2H), 6.91 – 6.89 (m, 2H), 5.54 (s, 2H), 3.90 (s, 3H).  $^{13}\text{C}$  NMR (100 MHz,  $\text{CDCl}_3$ )  $\delta$  162.0, 154.7, 143.4, 139.1, 133.4, 132.9, 129.1, 128.8, 128.7, 128.6, 128.3, 127.9, 115.9, 114.8, 113.5, 55.7, 50.8. HRMS (EI) calcd. for  $\text{C}_{27}\text{H}_{22}\text{N}_4\text{O}$  ( $[\text{M}]$ ): 418.1794, found: 418.1791.

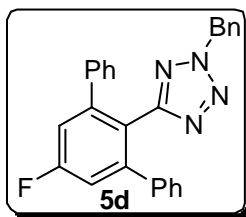

**5d:**  $^1\text{H}$  NMR (400 MHz,  $\text{CDCl}_3$ )  $\delta$  7.33 – 7.24 (m, 3H), 7.21 – 7.09 (m, 12H), 6.93 – 6.91 (m, 2H), 5.54 (s, 2H).  $^{13}\text{C}$  NMR (100 MHz,  $\text{CDCl}_3$ )  $\delta$  163.7, 163.0 (d,  $J = 250.6$  Hz), 146.3 (d,  $J = 8.8$  Hz), 139.6 (d,  $J = 1.8$  Hz), 133.7, 129.2, 128.9, 128.6, 128.1, 127.7, 127.5, 122.1 (d,  $J = 3.2$  Hz), 116.1 (d,  $J = 21.8$  Hz), 56.5. HRMS (EI) calcd. for  $\text{C}_{26}\text{H}_{19}\text{FN}_4$  ( $[\text{M}]$ ): 406.1594, found: 406.1576.

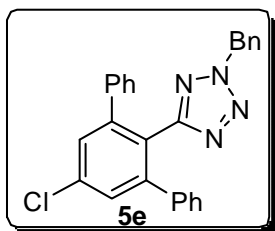

**5e:**  $^1\text{H}$  NMR (400 MHz,  $\text{CDCl}_3$ )  $\delta$  7.46 (s, 2H), 7.33 – 7.24 (m, 3H), 7.21 – 7.09 (m, 10H), 6.91 (dd,  $J = 8.0, 1.2$  Hz, 2H), 5.54 (s, 2H).  $^{13}\text{C}$  NMR (100 MHz,  $\text{CDCl}_3$ )  $\delta$  163.6, 145.5, 139.4, 135.7, 133.6, 129.2, 129.0, 128.9, 128.6, 128.1, 127.7, 127.5, 124.5, 56.4. HRMS (EI) calcd. for  $\text{C}_{26}\text{H}_{19}\text{ClN}_4$  ( $[\text{M}]$ ): 422.1298, found: 422.1303.

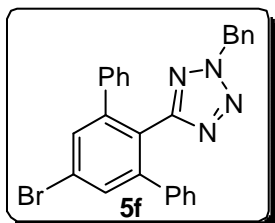

**5f:**  $^1\text{H}$  NMR (400 MHz,  $\text{CDCl}_3$ )  $\delta$  7.61 (s, 2H), 7.31 – 7.23 (m, 3H), 7.21 – 7.09 (m, 10H), 6.91 (d,  $J = 8.0$  Hz, 2H), 5.54 (s, 2H).  $^{13}\text{C}$  NMR (100 MHz,  $\text{CDCl}_3$ )  $\delta$  163.6, 145.6, 139.2, 137.4, 133.6, 131.9, 131.3, 129.2, 128.9, 128.6, 128.1, 127.7, 127.5, 124.9, 124.1, 56.5. HRMS (EI) calcd. for  $\text{C}_{26}\text{H}_{19}\text{BrN}_4$  ( $[\text{M}]$ ): 466.0793, found: 466.0787.

## Total Synthesis of losartan

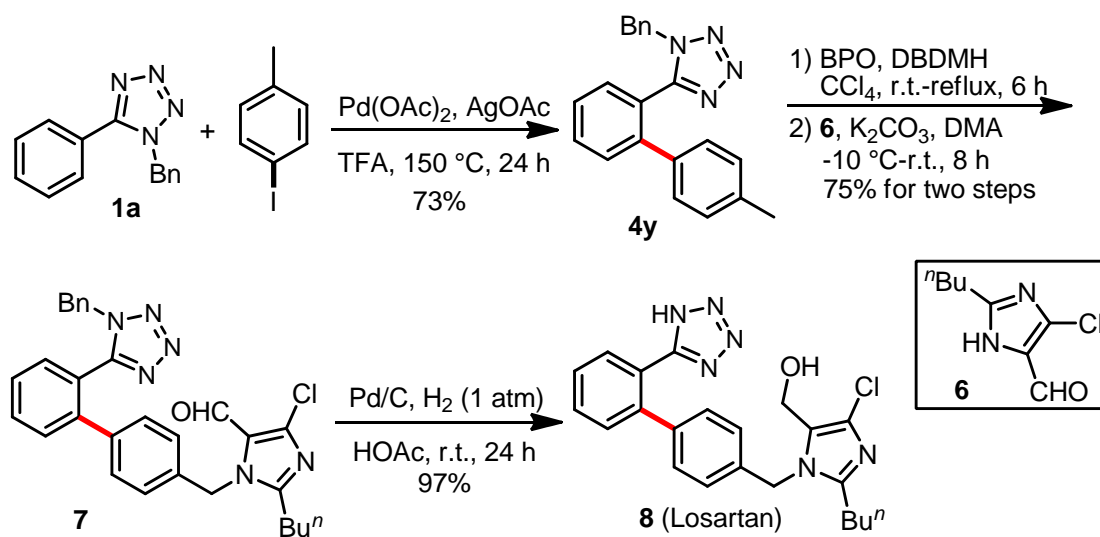

### 1-Benzyl-5-(2-*p*-tolylphenyl)-1*H*-tetrazole (**4y**)

1-Benzyl-5-phenyl-1*H*-tetrazole (**1a**) (803 mg, 3.4 mmol), Pd(OAc)<sub>2</sub> (38.1 mg, 0.17 mmol, 5 mol%), AgOAc (2.27 g, 13.6 mmol, 4 equiv.), and 4-iodotoluene (**3r**) (7.4 g, 34 mmol, 10 equiv.), were dissolved in 3.4 mL TFA in a 100 mL sealed tube. The tube was sealed with a Teflon lined cap and the reaction mixture was stirred at 150 °C for 24 h. After cooling to room temperature, the mixture was filtered through a pad of celite, and the celite was rinsed with copious EtOAc. The filtration was washed with water, and the aqueous phase was extracted with EtOAc for 3 times. The combined organic layer was washed with brine, and dried over anhydrous Na<sub>2</sub>SO<sub>4</sub>. After filtration, the filtrate was concentrated under reduced pressure and the residue was purified by chromatography on a silica gel (petroleum/ethyl acetate = 10:1) to afford **4y** (810 mg, 73%) as a white solid.

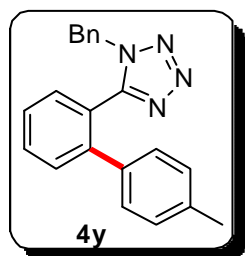

**4y**: <sup>1</sup>H NMR (400 MHz, CDCl<sub>3</sub>) δ 7.64 – 7.60 (m, 1H), 7.56 (d, *J* = 8.0, 1.2 Hz, 1H), 7.40 (td, *J* = 8.0, 1.6 Hz, 1H), 7.34 (dd, *J* = 8.0, 1.2 Hz, 1H), 7.22 – 7.09 (m, 5H), 7.03 (d, *J* = 8.0 Hz, 2H), 6.76 (d, *J* = 4.0 Hz, 2H), 4.77 (s, 2H), 2.34 (s, 2H). <sup>13</sup>C NMR (100 MHz, CDCl<sub>3</sub>) δ 154.9, 141.8, 138.2, 136.1, 133.3, 131.7,

131.4, 130.3, 129.9, 128.8, 128.7, 128.0, 127.7, 122.9, 51.0, 21.3. HRMS (ESI) calcd. for C<sub>21</sub>H<sub>19</sub>N<sub>4</sub> ([M+H]<sup>+</sup>): 327.1610, found: 327.1610.

2-Butyl-4-chloro-1-[2'-(1-benzyl-1*H*-tetrazol-5-yl)biphenyl-4-yl]methyl-imidazole-5-carbaldehyde (**7**)

To a stirred solution of **4y** (39.2 mg, 0.12 mmol) and DBDMH (1,3-dibromo-5,5-dimethyl hydantoin) (22.9 mg, 0.08 mmol, 0.75 equiv) in 0.4 mL CCl<sub>4</sub>, was added a solution of 1.5 mg (0.006 mmol, 5 mol%) BPO in 0.05 mL CCl<sub>4</sub> at r.t., and the reaction mixture heated to reflux for 7 hours. After cooling to room temperature, the reaction mixture was diluted with CH<sub>2</sub>Cl<sub>2</sub>, filtered out the undissolved salts and washed with CH<sub>2</sub>Cl<sub>2</sub>. The filtrate was washed with water and brine, dried over anhydrous Na<sub>2</sub>SO<sub>4</sub>, filtered and concentrated under reduced pressure. The residue was dissolved in 1 mL DMA, then K<sub>2</sub>CO<sub>3</sub> (17.0 mg, 0.123 mmol, 1.03 equiv) and 2-butyl-4-chloro-1*H*-imidazole-5-carbaldehyde (**6**) (22.8 mg, 0.122 mmol, 1.02 equiv) were added successively. The reaction mixture was stirred at -10 °C for 4 hours, and another 4 hours at room temperature. After filtration, the filter cake was washed with EtOAc. The combined organic phase was washed with water and brine, dried over Na<sub>2</sub>SO<sub>4</sub>, filtered, and concentrated under reduced pressure. The residue was purified by column chromatography with an eluent of petroleum ether/ethyl acetate (3:1) to furnish **7** (45.9 mg, 75% for 2 steps) as a white solid.

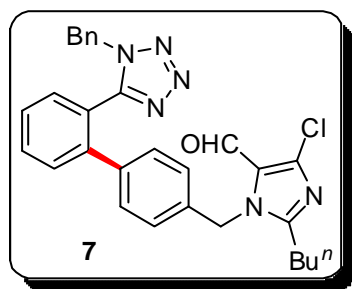

**7**: <sup>1</sup>H NMR (400 MHz, CDCl<sub>3</sub>) δ 9.75 (s, 1H), 7.63 (td, *J* = 8.0, 4.0 Hz, 1H), 7.51 (d, *J* = 8.0 Hz, 1H), 7.43 (td, *J* = 8.0, 1.2 Hz, 1H), 7.32 (dd, *J* = 8.0, 1.2 Hz, 1H), 7.23 – 7.19 (m, 3H), 7.08 (d, *J* = 8.0 Hz, 2H), 6.96 (d, *J* = 8.0 Hz, 2H), 6.77 (d, *J* = 8.0 Hz, 2H), 5.51 (s, 2H), 4.80 (s, 2H), 2.61 (t, *J* = 8.0 Hz, 2H), 1.72 – 1.64 (m, 2H), 1.40 – 1.31 (m, 2H), 0.89 (t, *J* = 8.0 Hz, 3H). <sup>13</sup>C NMR (100 MHz, CDCl<sub>3</sub>) δ 178.1, 154.7, 154.5, 143.4, 141.1, 138.8, 135.7, 133.1, 131.8, 131.4, 130.4, 129.4, 128.9, 128.8, 128.2, 128.0, 127.1, 124.4, 122.8, 51.0, 48.0, 29.4, 26.7, 22.5, 13.8. HRMS (ESI) calcd. for C<sub>29</sub>H<sub>28</sub>ClN<sub>6</sub>O ([M+H]<sup>+</sup>): 511.2013, found: 511.2014.

Losartan (**8**)

In a round bottom flask, 1.5 mL acetic acid was added to a mixture of **7** (51.1mg, 0.1 mmol) and 10% Pd/C (61.3 mg). The mixture was stirred under 1 atm of hydrogen

at r.t. for 24 h. After completion, the suspension was diluted with CH<sub>2</sub>Cl<sub>2</sub>, filtered through celite, and rinsed with CH<sub>2</sub>Cl<sub>2</sub>. The filtrate was concentrated under reduced pressure to give losartan **8** (40.8 mg, 97%) as a pale yellow solid.

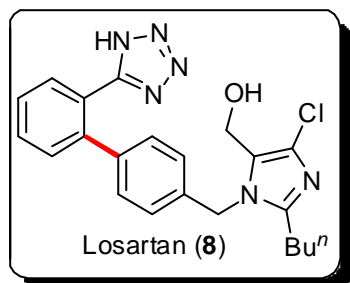

**8**: <sup>1</sup>H NMR (400 MHz, CDCl<sub>3</sub>) δ 7.68 – 7.64 (m, 2H), 7.58 – 7.54 (m, 1H), 7.51 – 7.49 (m, 1H), 7.18 (s, 1H), 7.10 (d, *J* = 12 Hz, 2H), 7.04 (d, *J* = 8.0 Hz, 2H), 5.34 (s, 2H), 4.38 (s, 2H), 2.66 (t, *J* = 8.0 Hz, 2H), 1.49 – 1.42 (m, 2H), 1.28 – 1.19 (m, 2H), 0.80 (t, *J* = 8.0 Hz, 3H).

HRMS (ESI) calcd. For C<sub>22</sub>H<sub>24</sub>ClN<sub>6</sub>O ([M+H]<sup>+</sup>):

423.1702, found: 423.1700

Comparison of the diagnostic <sup>1</sup>H NMR signals of the synthetic **8** with those reported in reference 5.

| Reference 5                         | Synthetic <b>8</b>                     |                                            |
|-------------------------------------|----------------------------------------|--------------------------------------------|
| 7.68 (t, <i>J</i> = 7.4 Hz, 1H)     | 7.68 – 7.63 (m, 2H)                    |                                            |
| 7.66 (d, <i>J</i> = 7.4 Hz, 1H)     |                                        |                                            |
| 7.58 (t, <i>J</i> = 7.4 Hz, 1H)     | 7.58 – 7.53 (m, 1H)                    |                                            |
| 7.55 (d, <i>J</i> = 7.4 Hz, 1H)     | 7.51 – 7.48 (m, 1H)                    |                                            |
|                                     | 7.17 (s, 1H)                           | Move to 7.30 after adding D <sub>2</sub> O |
| 7.08 (d, <i>J</i> = 8.2 Hz, 2H)     | 7.09 (d, <i>J</i> = 8.3 Hz, 2H)        |                                            |
| 7.02 (d, <i>J</i> = 8.2 Hz, 2H)     | 7.03 (d, <i>J</i> = 8.3 Hz, 2H)        |                                            |
| 5.23, (s, 1H)                       | 5.34 (s, 2H)                           | Imid-5-CH <sub>2</sub> OH                  |
| 4.32 (s, 1H)                        | 4.37 (s, 2H)                           | ArCH <sub>2</sub> N                        |
| 2.45 (t, <i>J</i> = 7.5 Hz, 2H)     | 2.65 (t, <i>J</i> = 7.6 Hz, 2H)        |                                            |
| 1.44 (quint, <i>J</i> = 7.5 Hz, 2H) | 1.45 (dt, <i>J</i> = 15.3, 7.6 Hz, 2H) |                                            |
| 1.23 (sext, <i>J</i> = 7.5 Hz, 2H)  | 1.28 – 1.19 (m, 2H)                    |                                            |
| 0.80 (t, <i>J</i> = 7.7 Hz, 3H)     | 0.80 (t, <i>J</i> = 8.0 Hz, 3H)        |                                            |



## References:

- [1] K. Koguro, T. Oga, S. Mitsui, R. Orita, *Synthesis* **1998**, 910.
- [2] G. Aridoss, K. K. Laali, *Eur. J. Org. Chem.* **2011**, 6343.
- [3] M. Seki, M. Nagahama, *J. Org. Chem.* **2011**, 76, 10198.
- [4] P. Moutevelis-Minakakis, E. Papavassilopoulou, G. Michas, K. Georgikopoulou, M.-E. Ragoussi, N. Neophytou, P. Zoumpoulakis, T. Mavromoustakos, D. Hadjipavlou-Litina. *Bioorg. Med. Chem.* **2011**, 19, 2888.
- [5] M. Seki, M. Nagahama, *J. Org. Chem.* **2011**, 76, 10198.

# $^1\text{H}$ and $^{13}\text{C}$ NMR Spectra

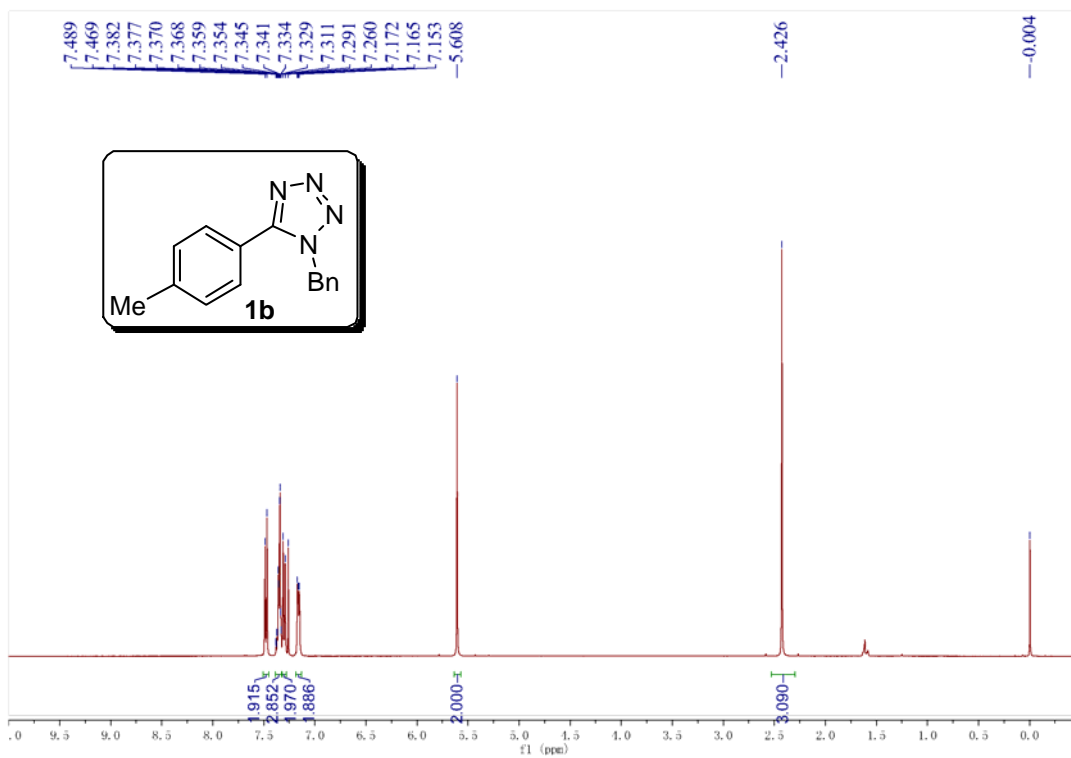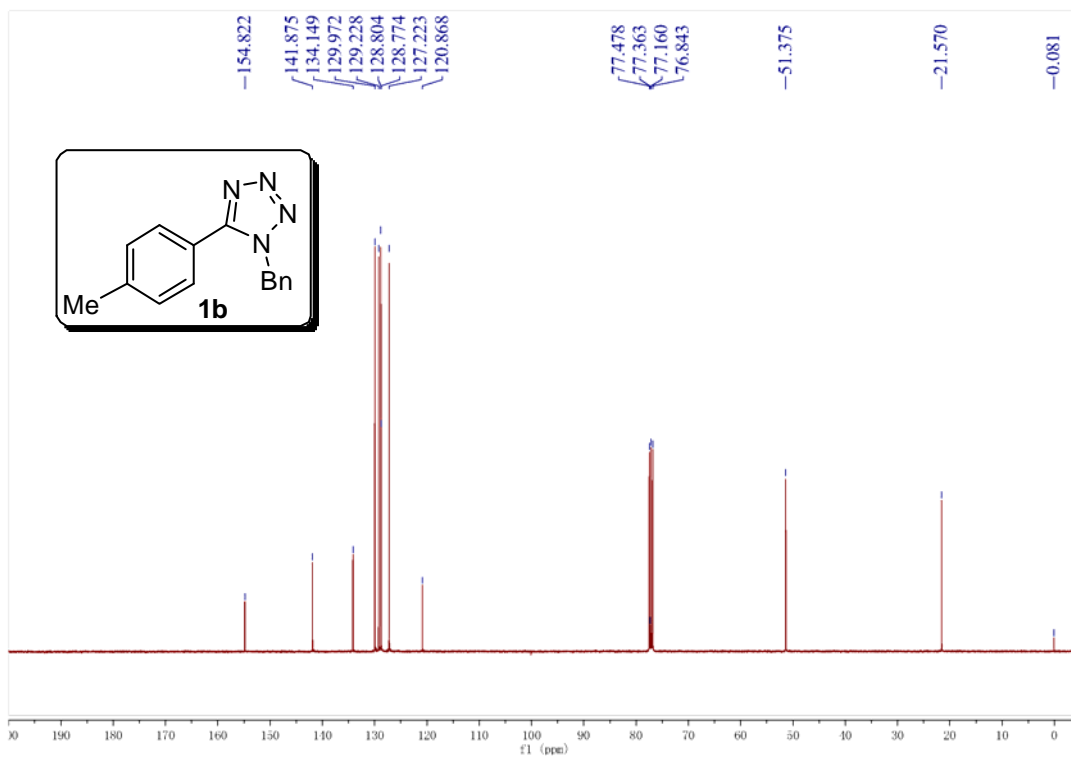

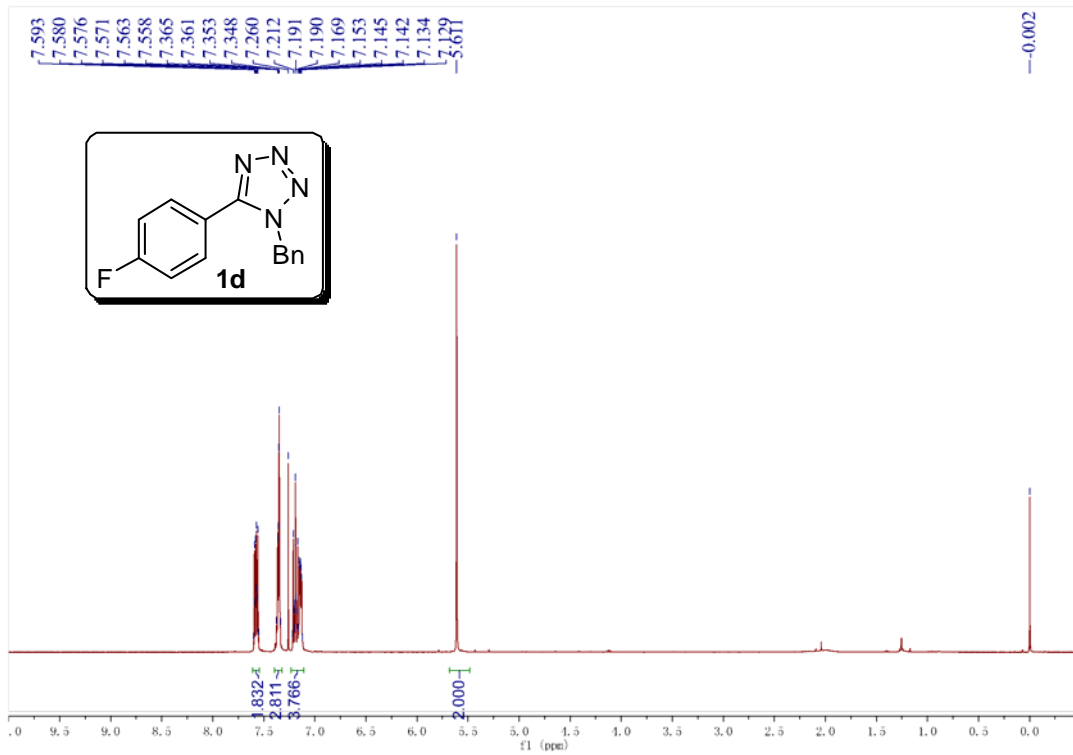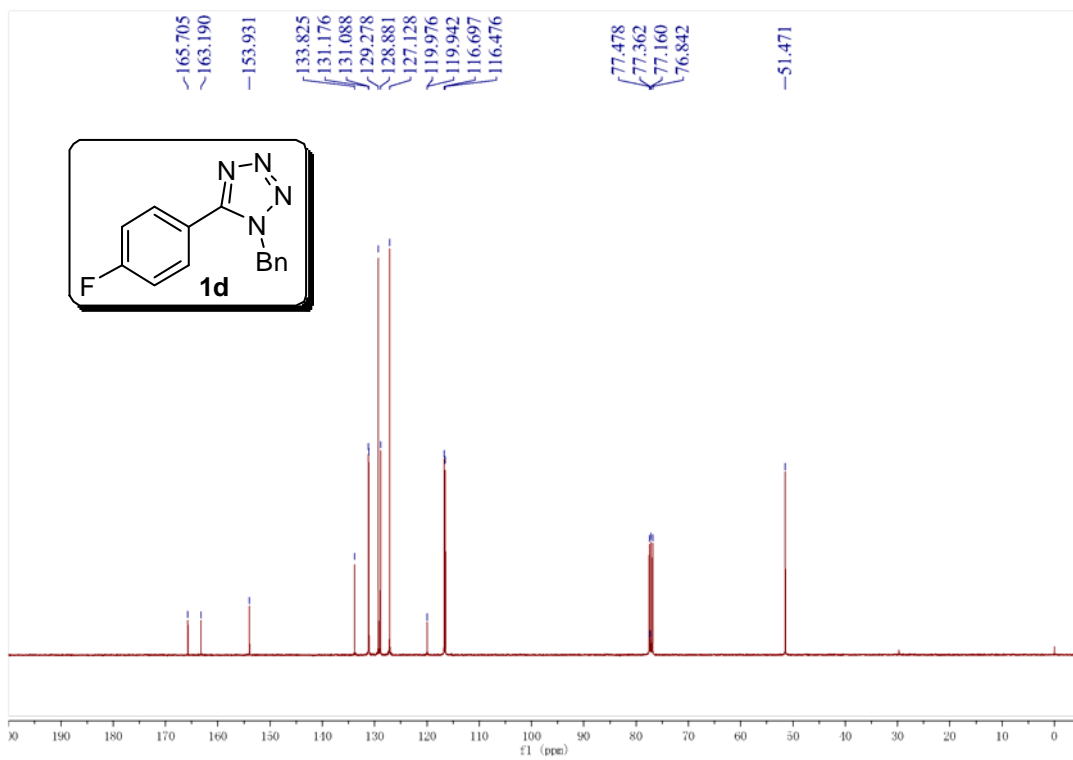

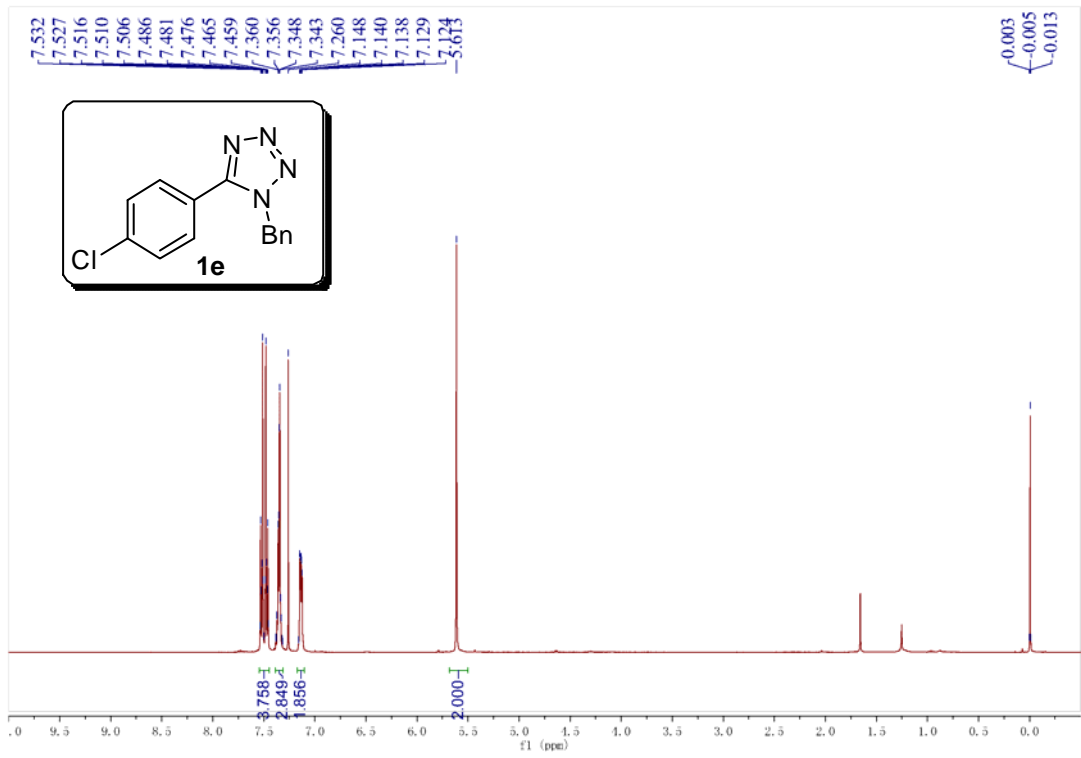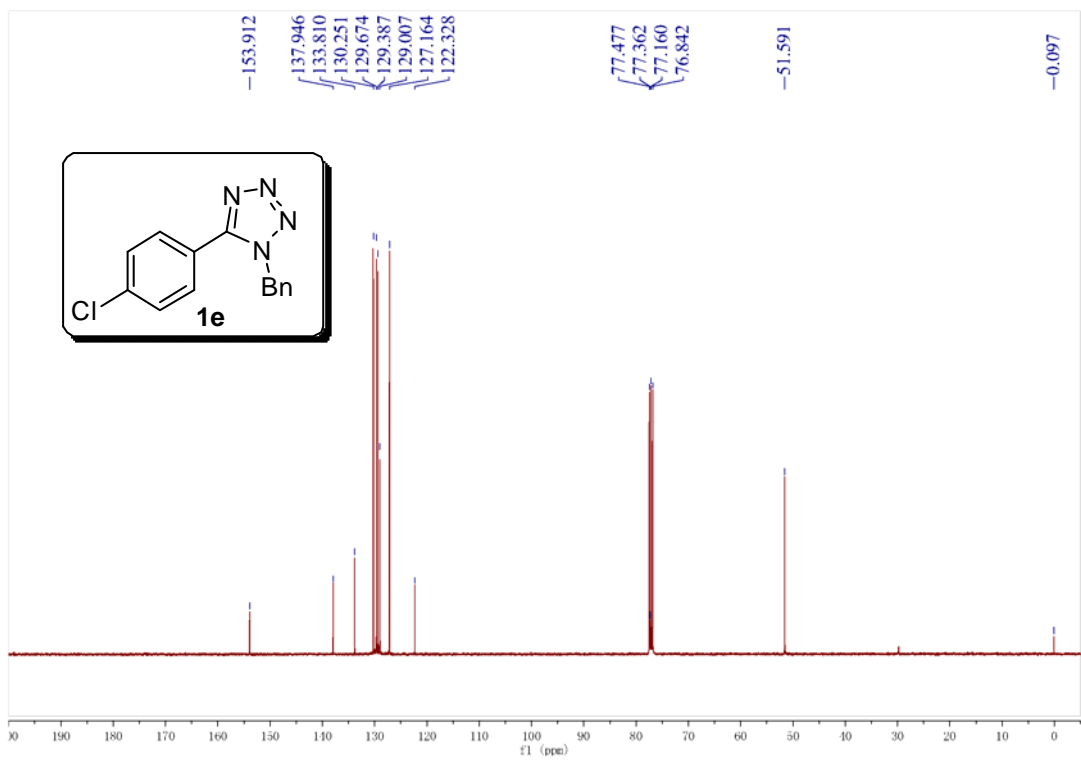

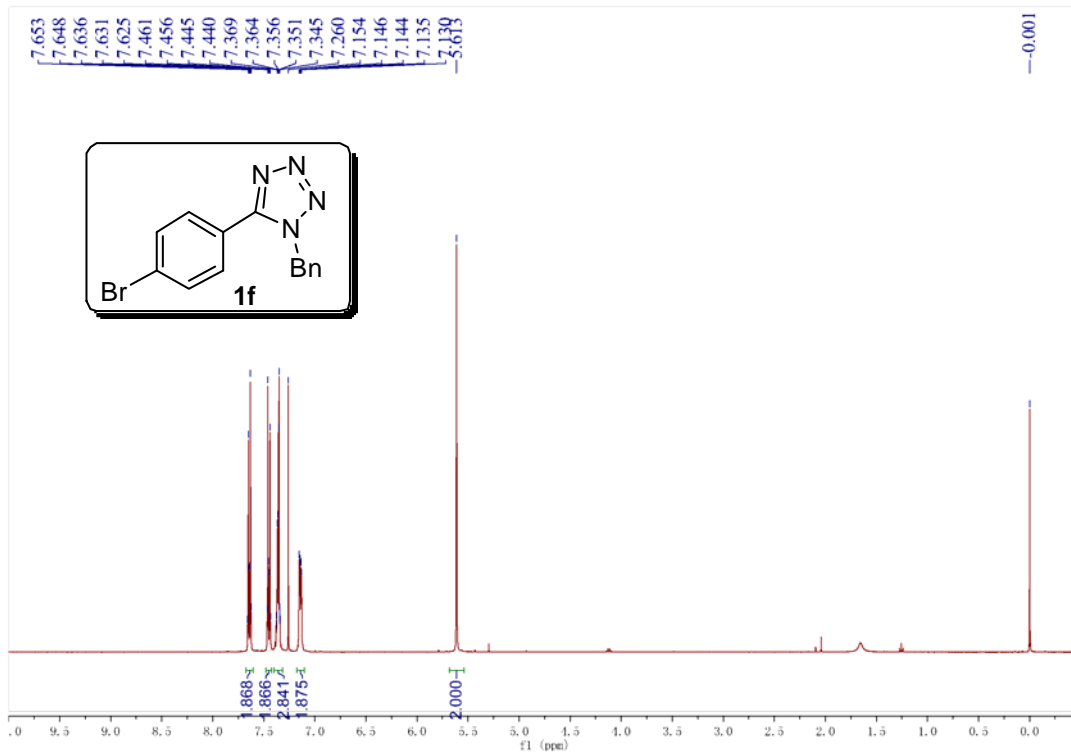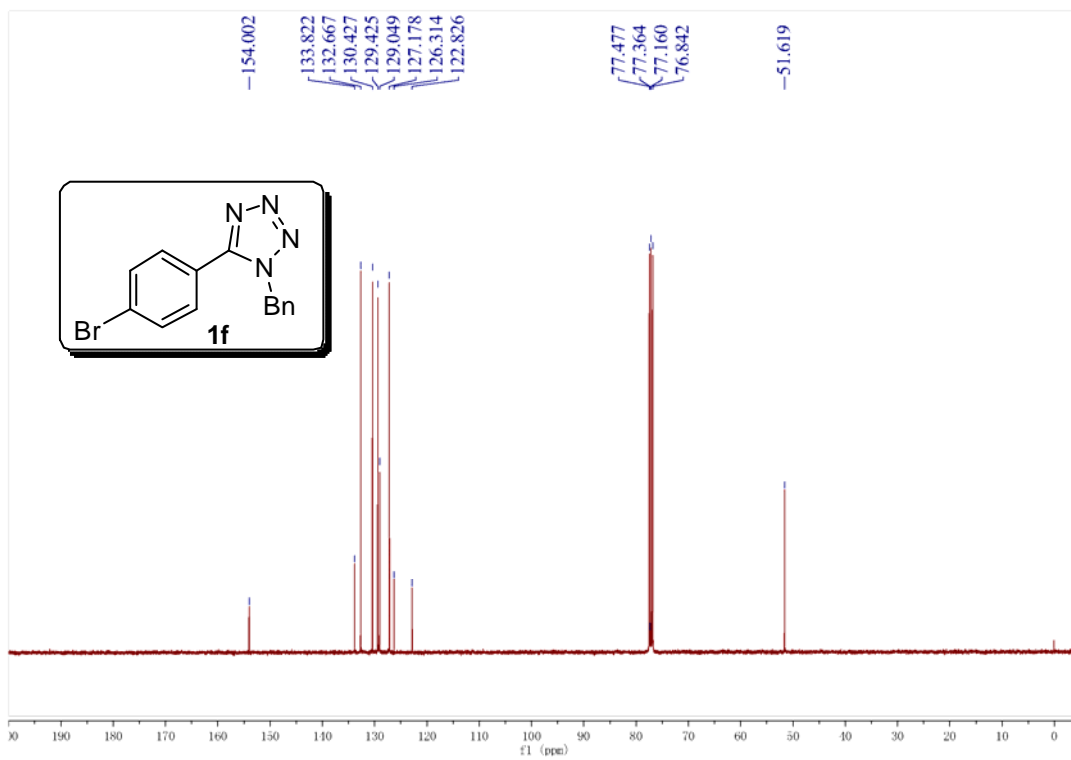

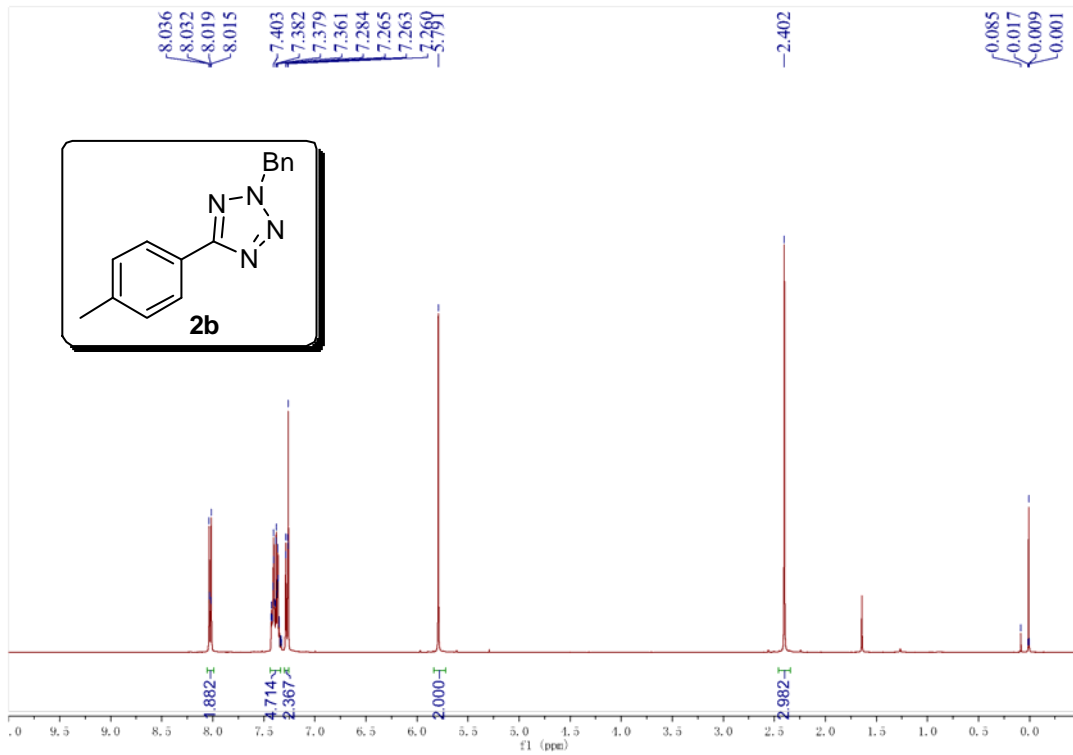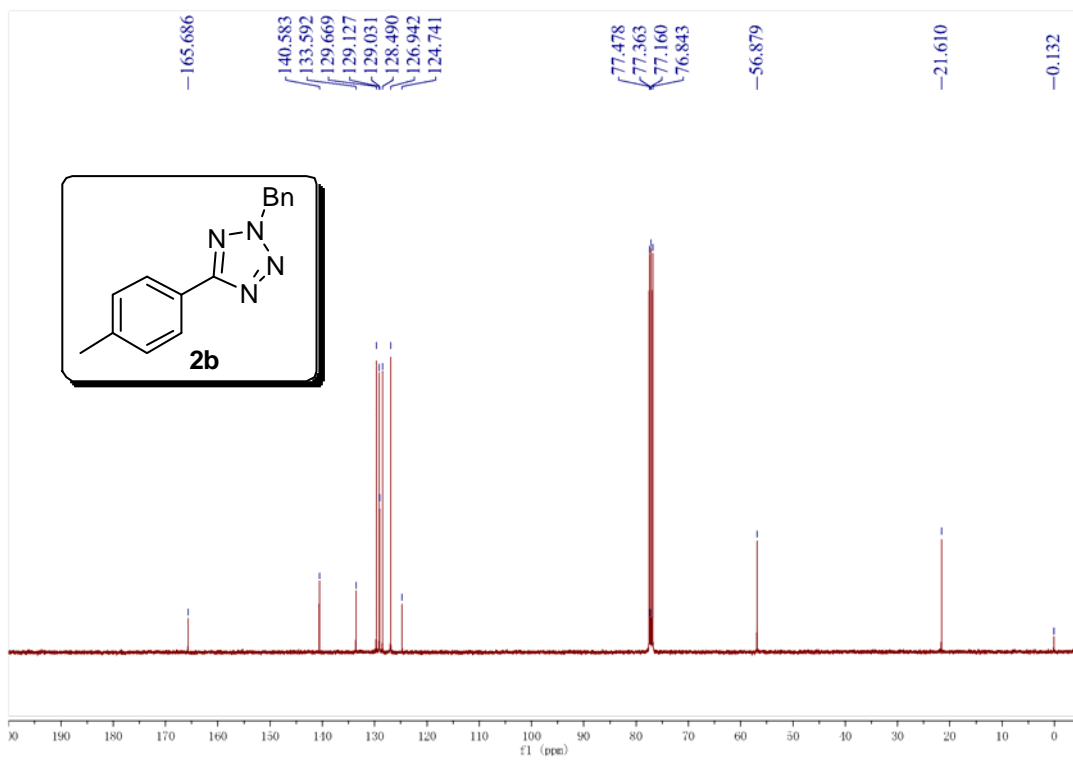

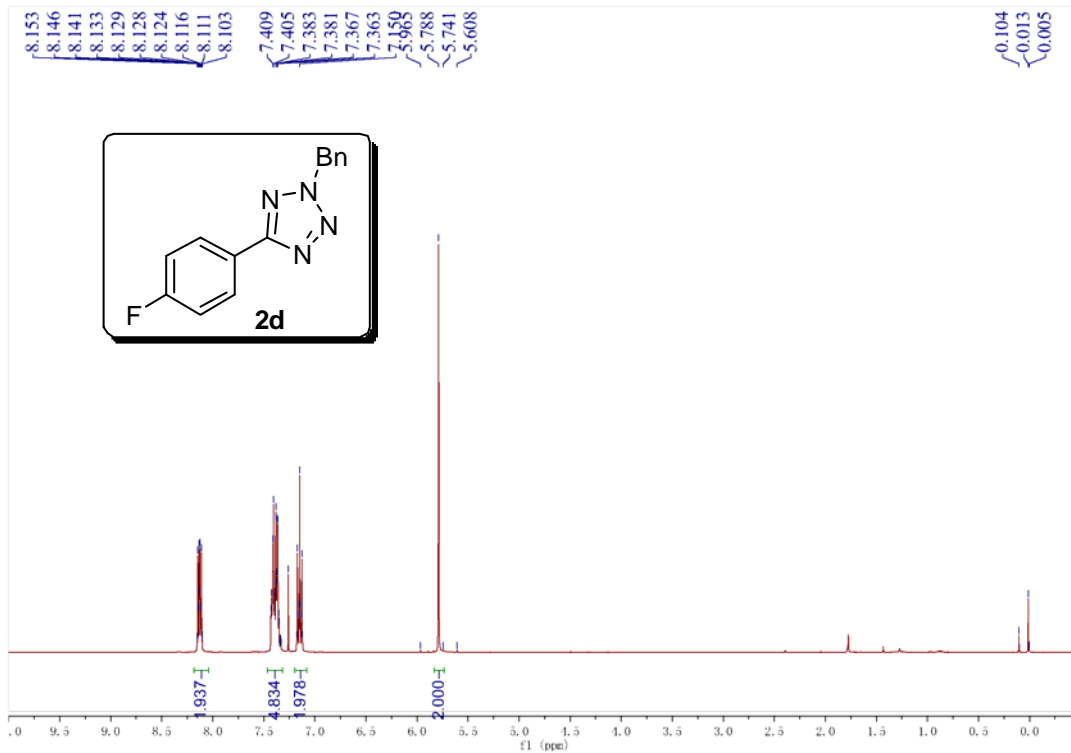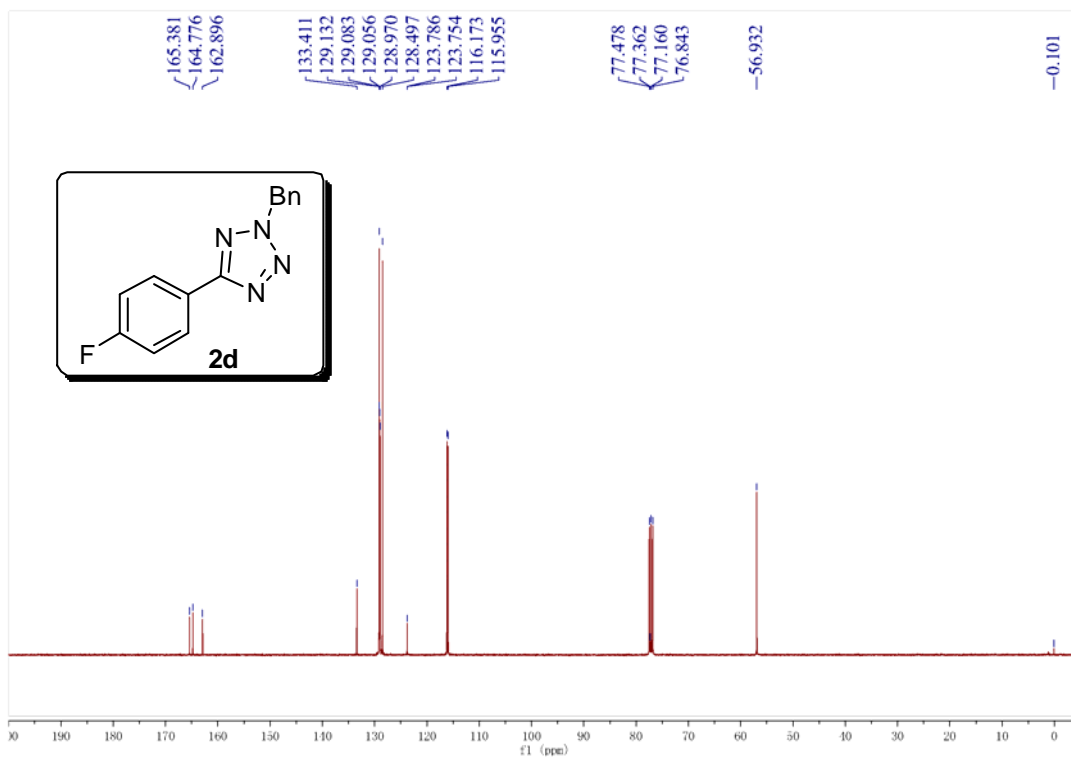

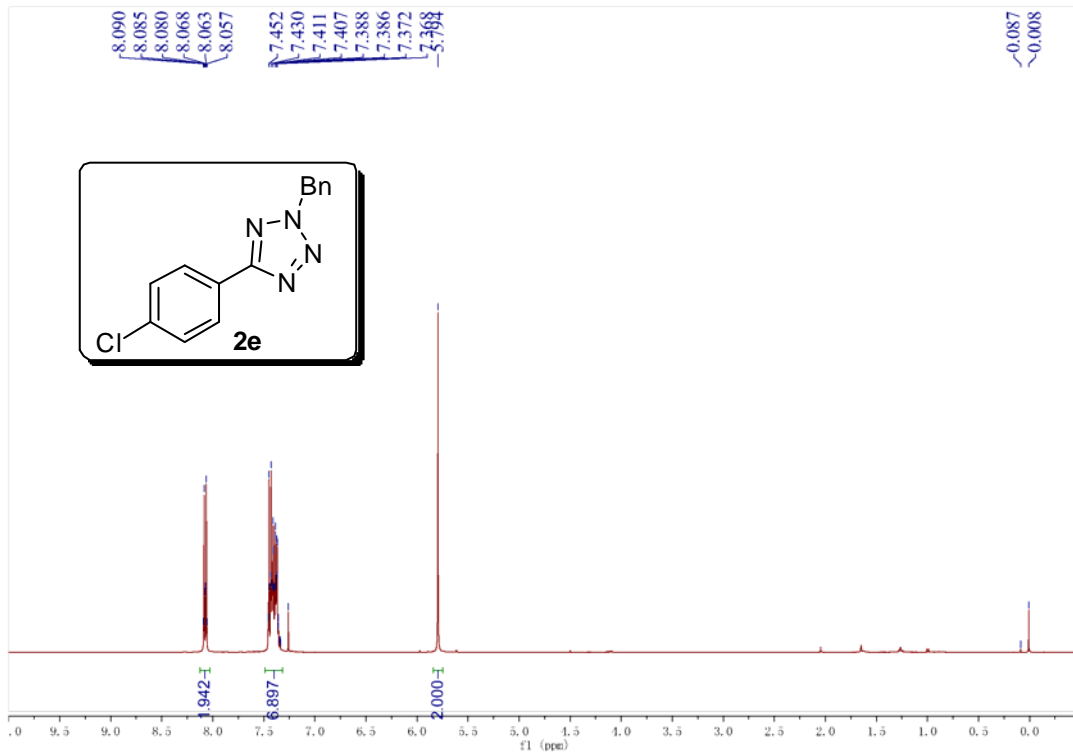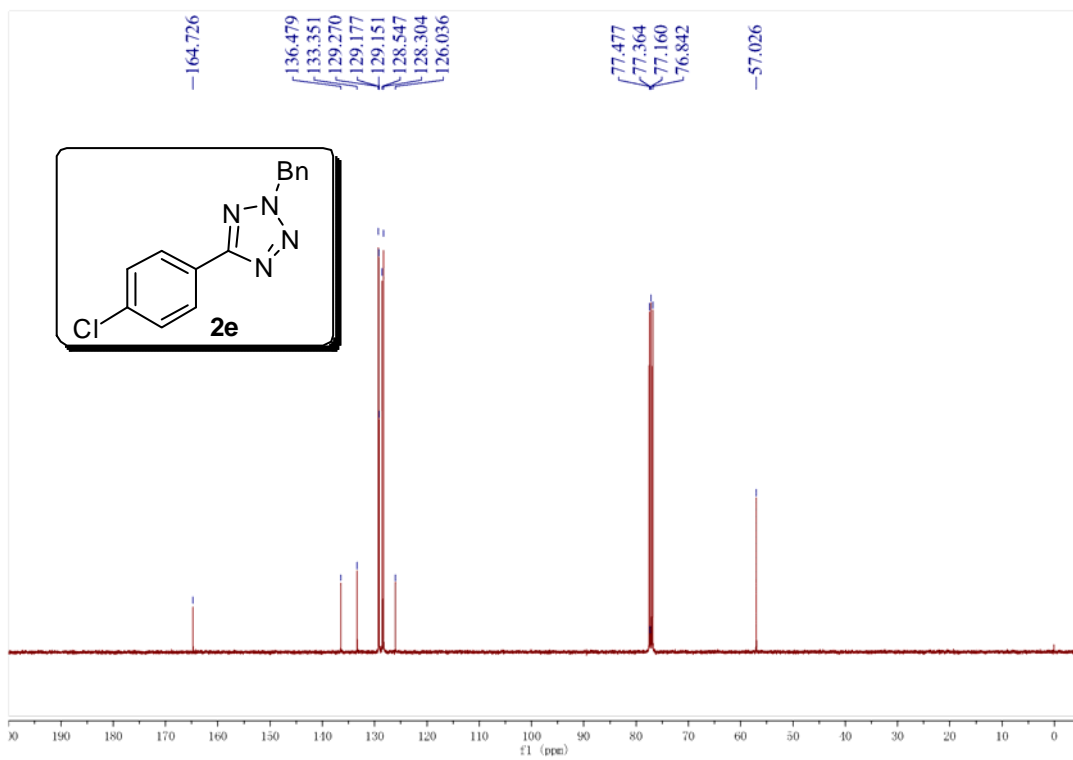



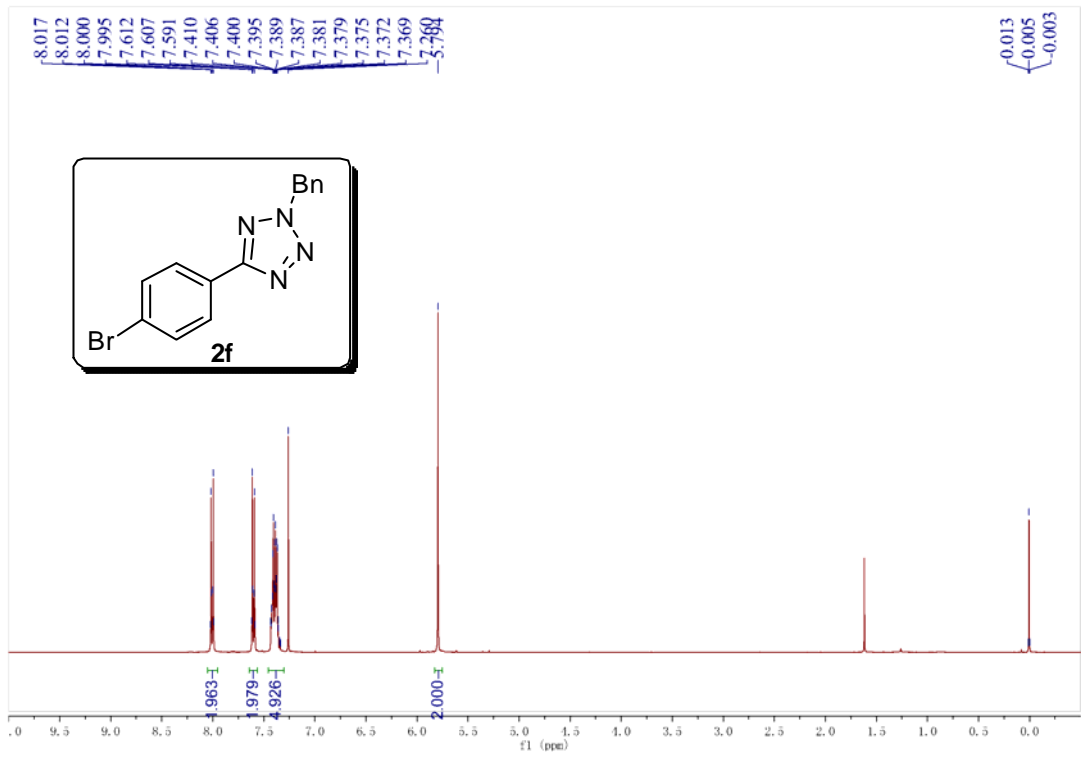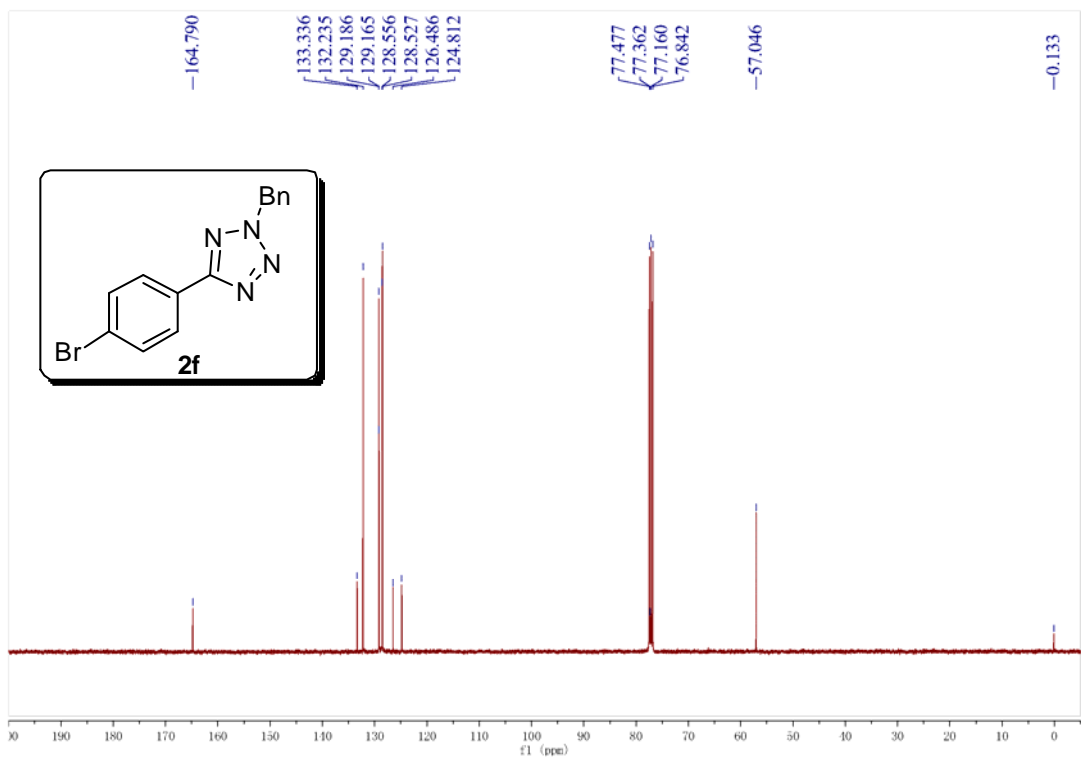

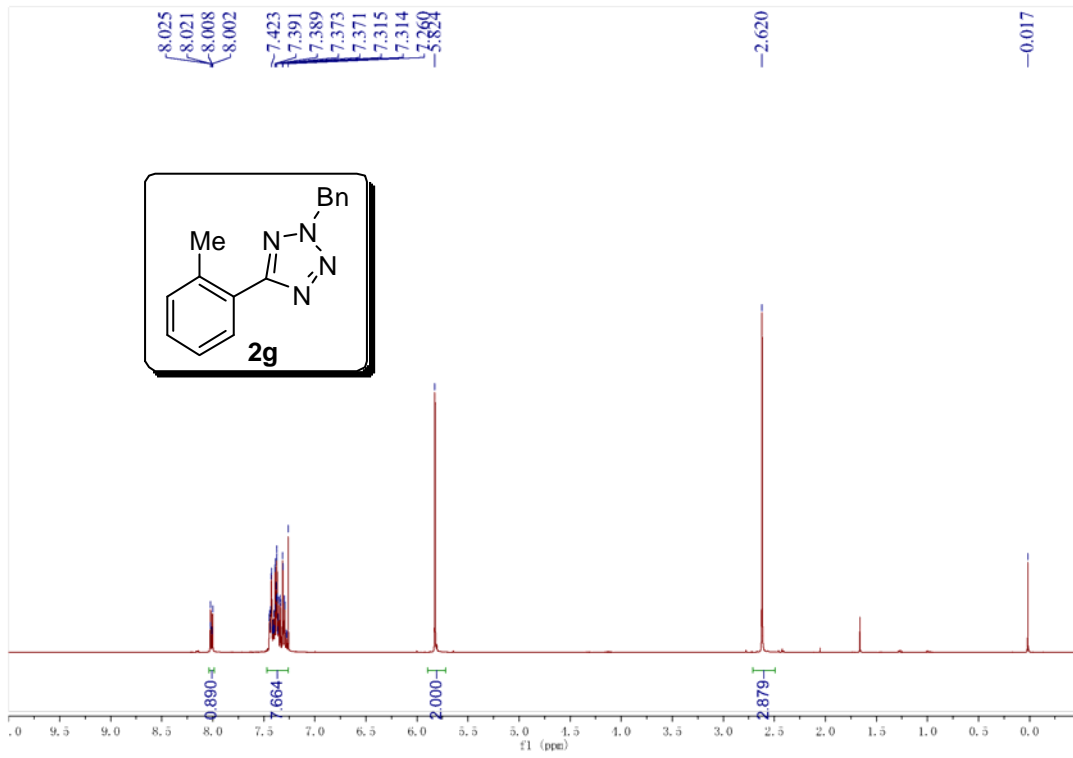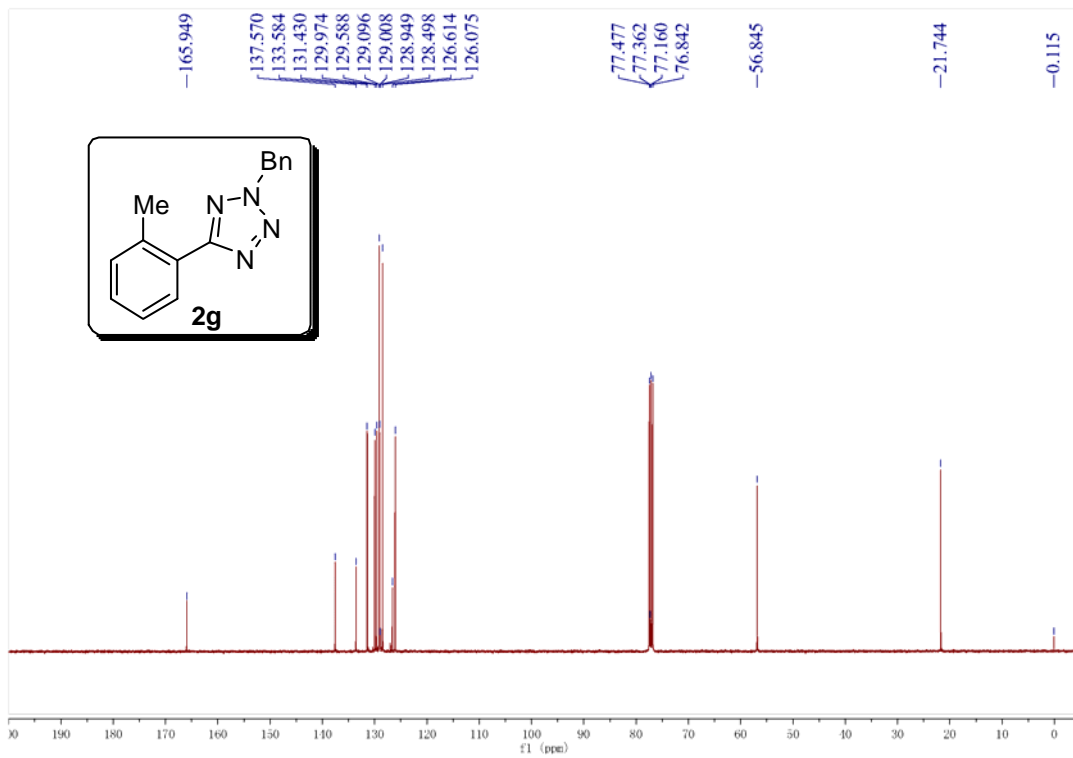

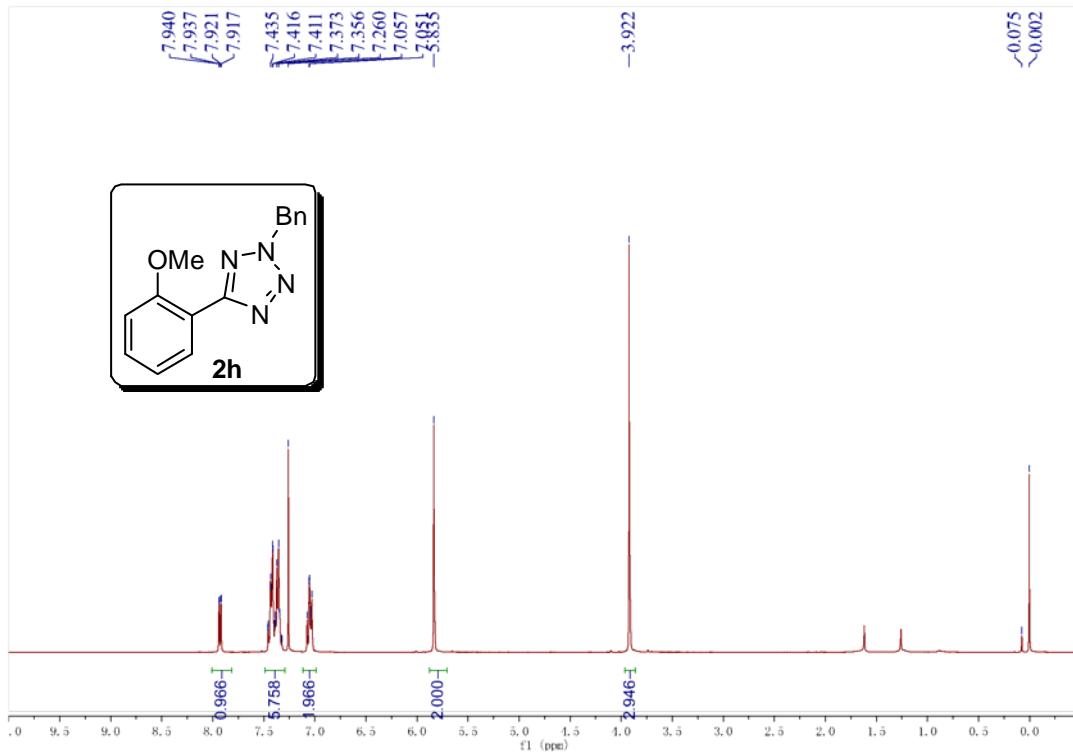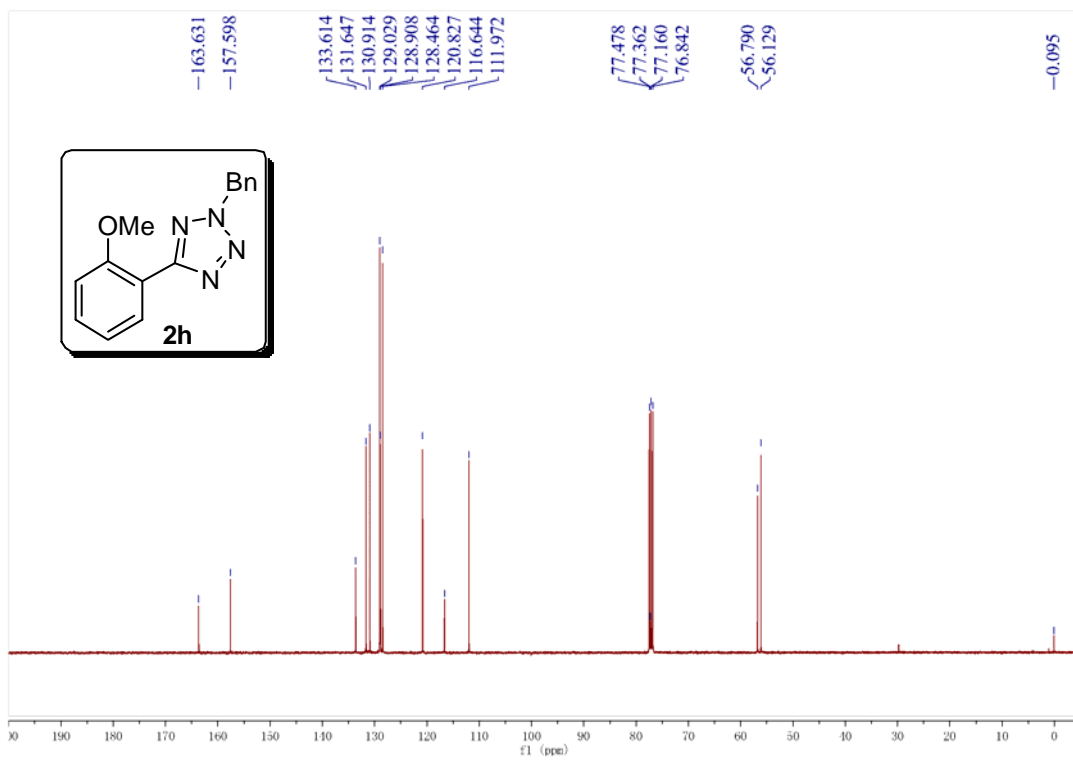

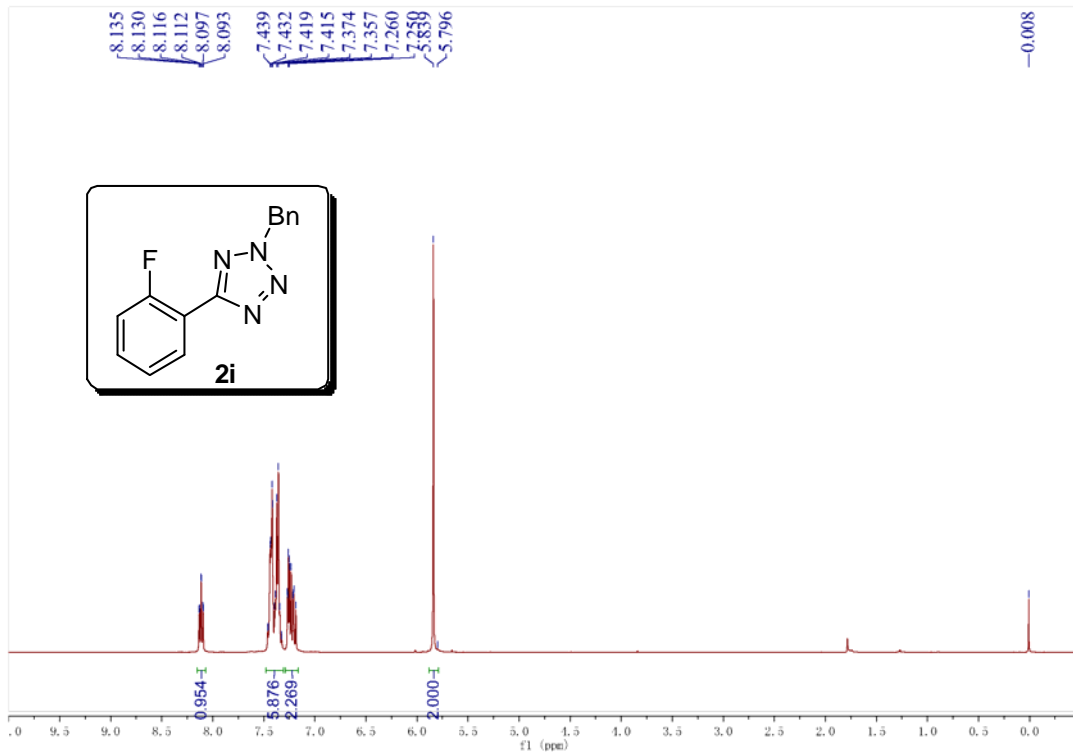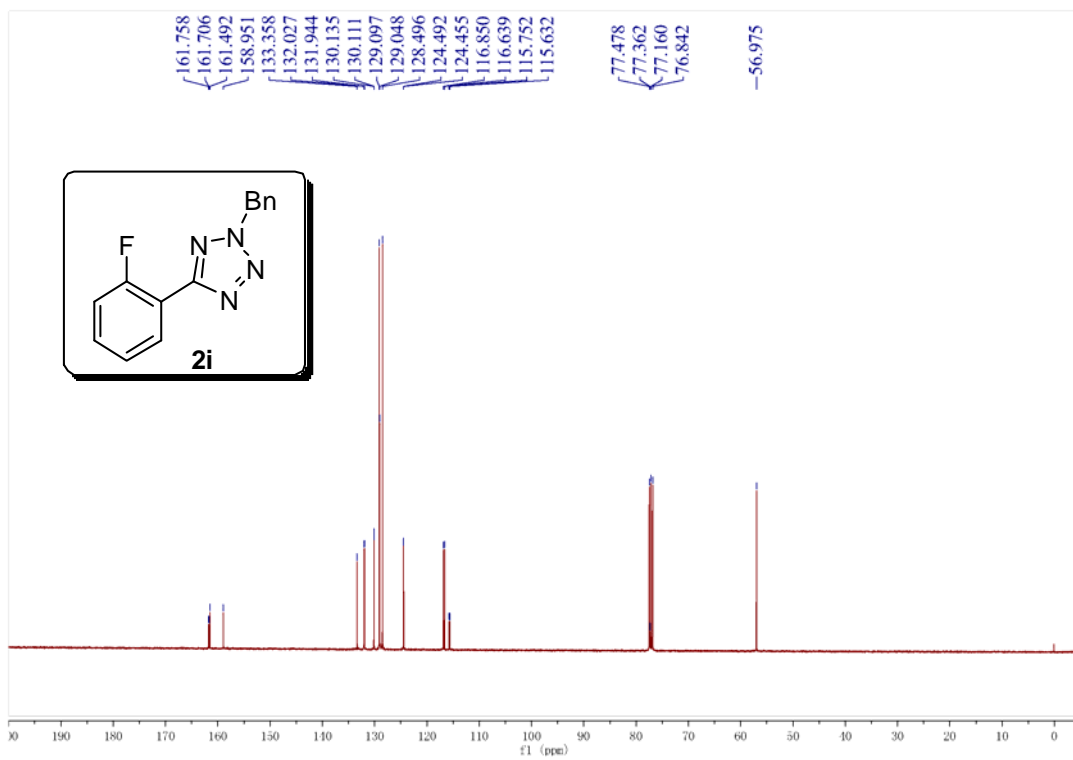

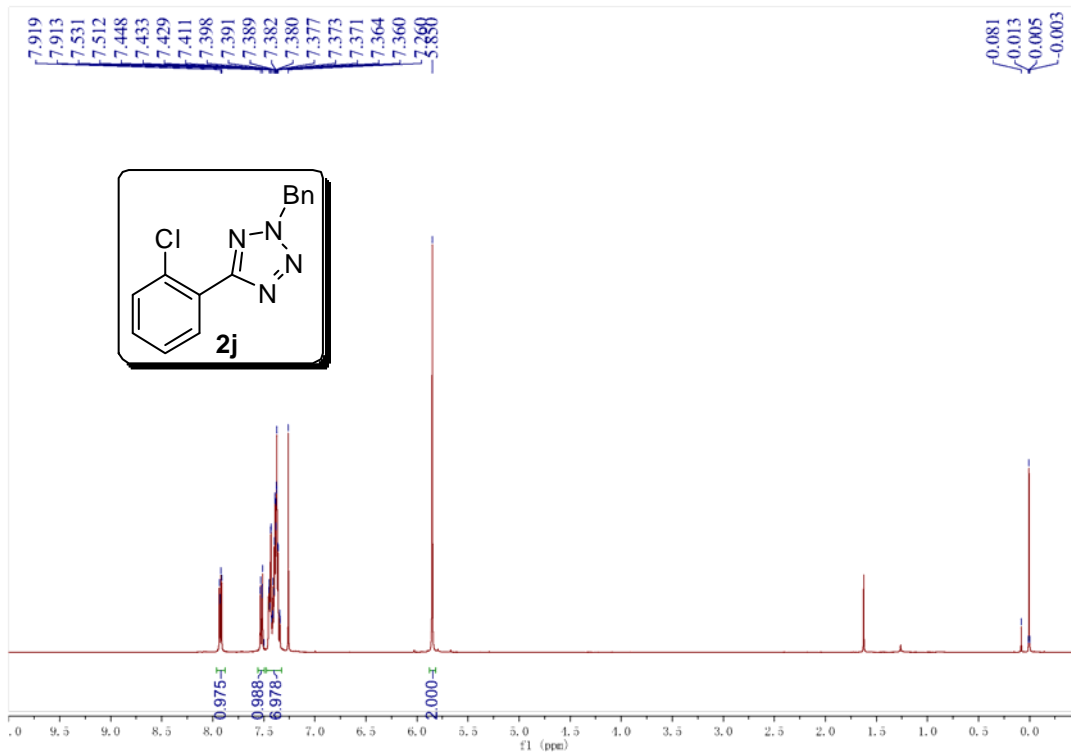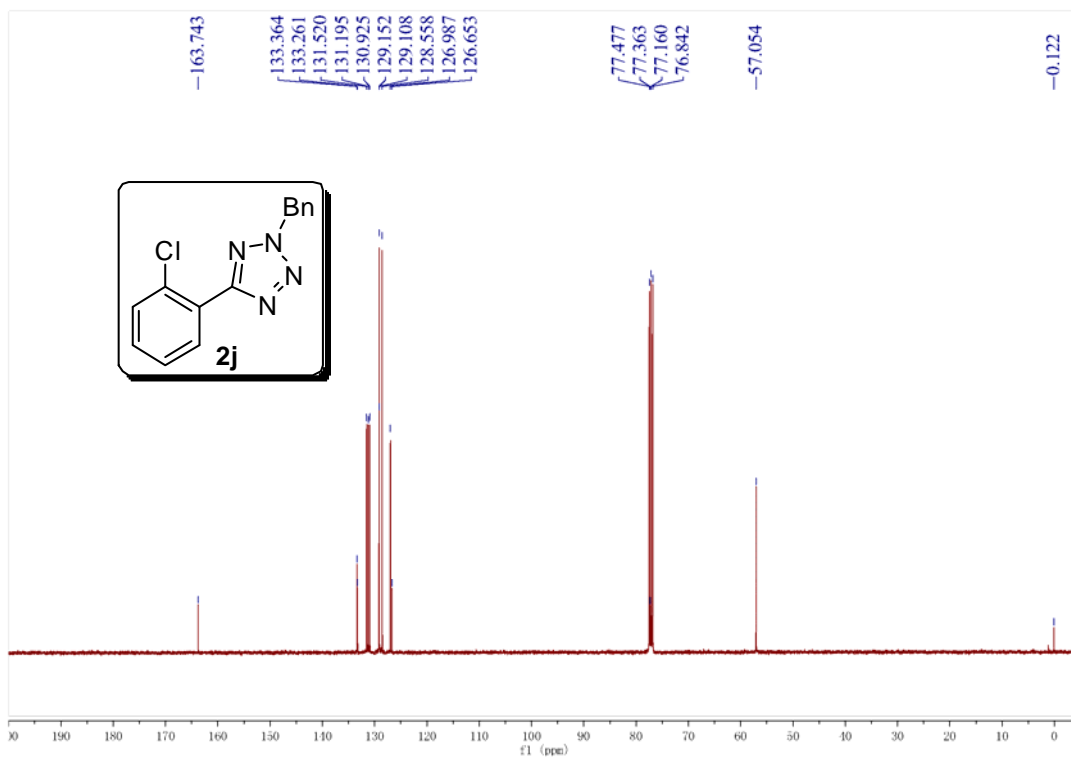

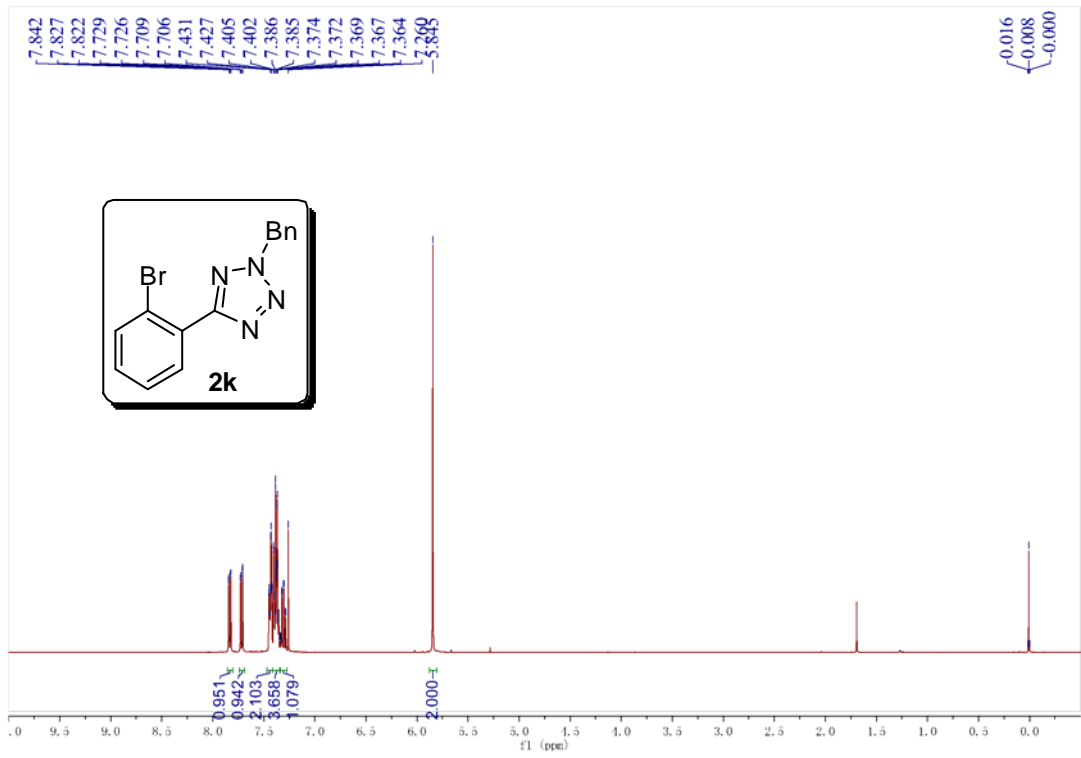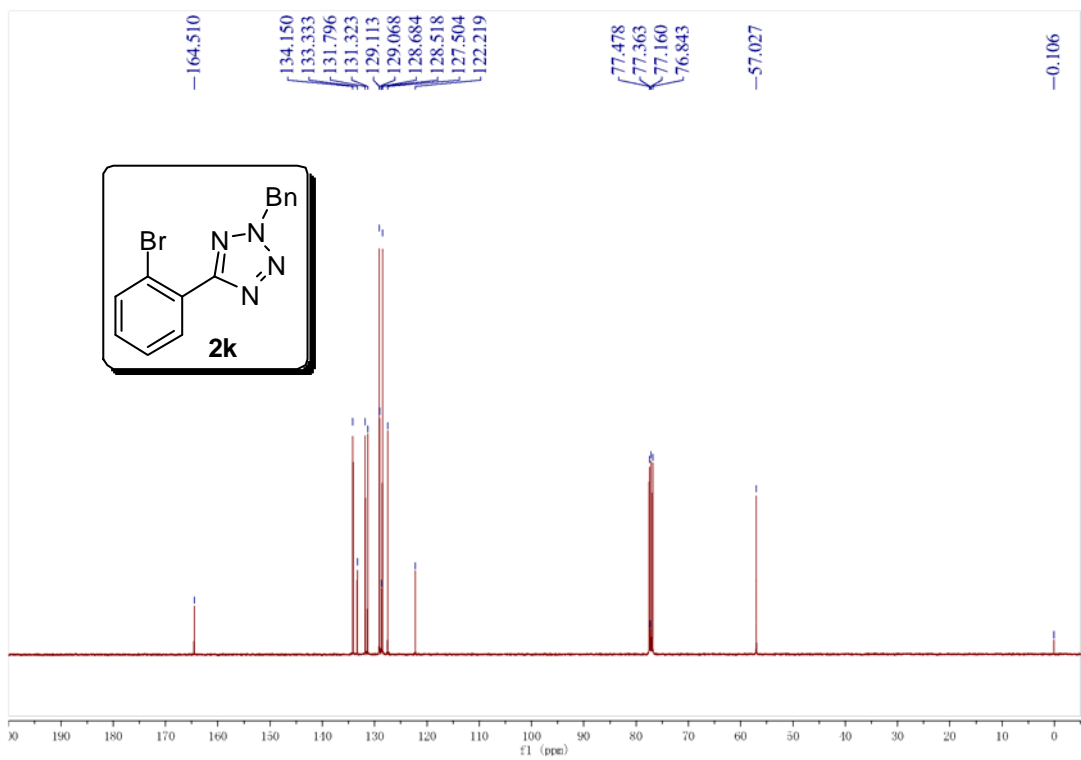

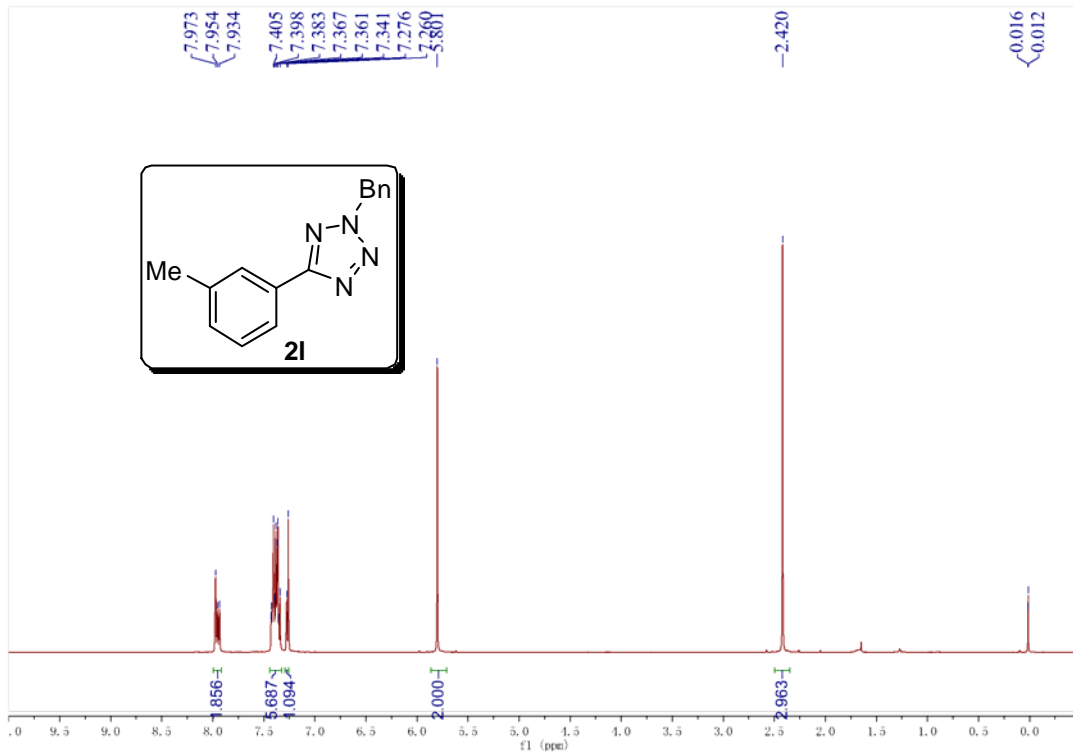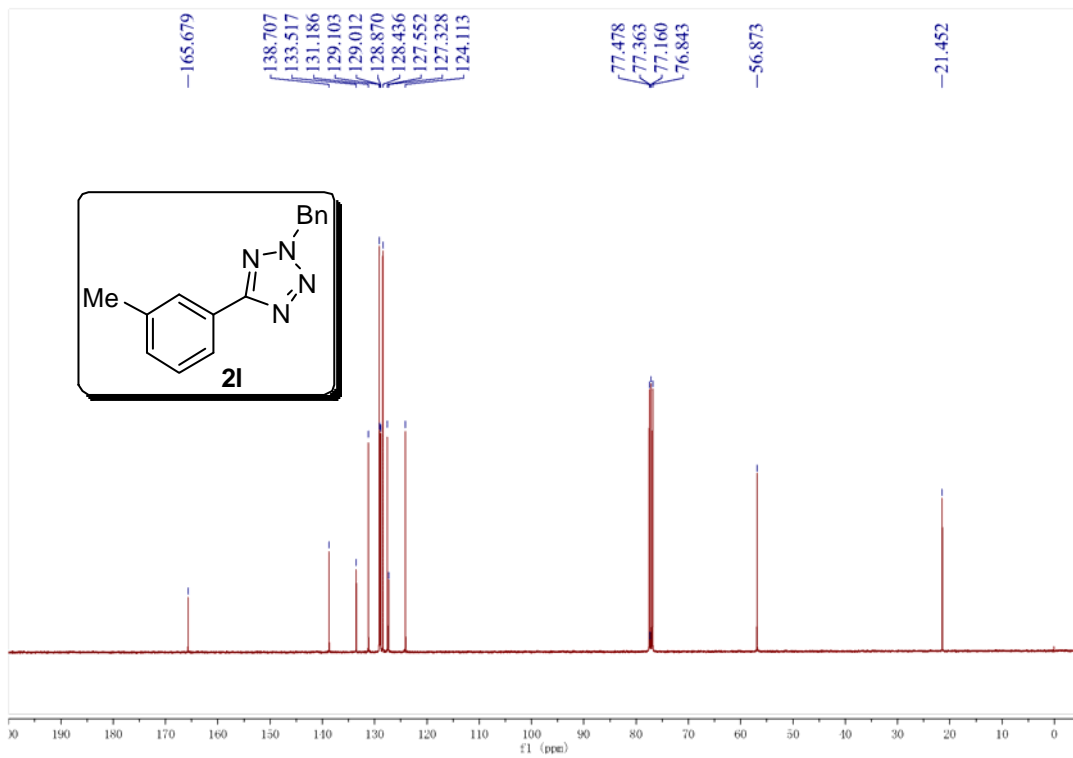

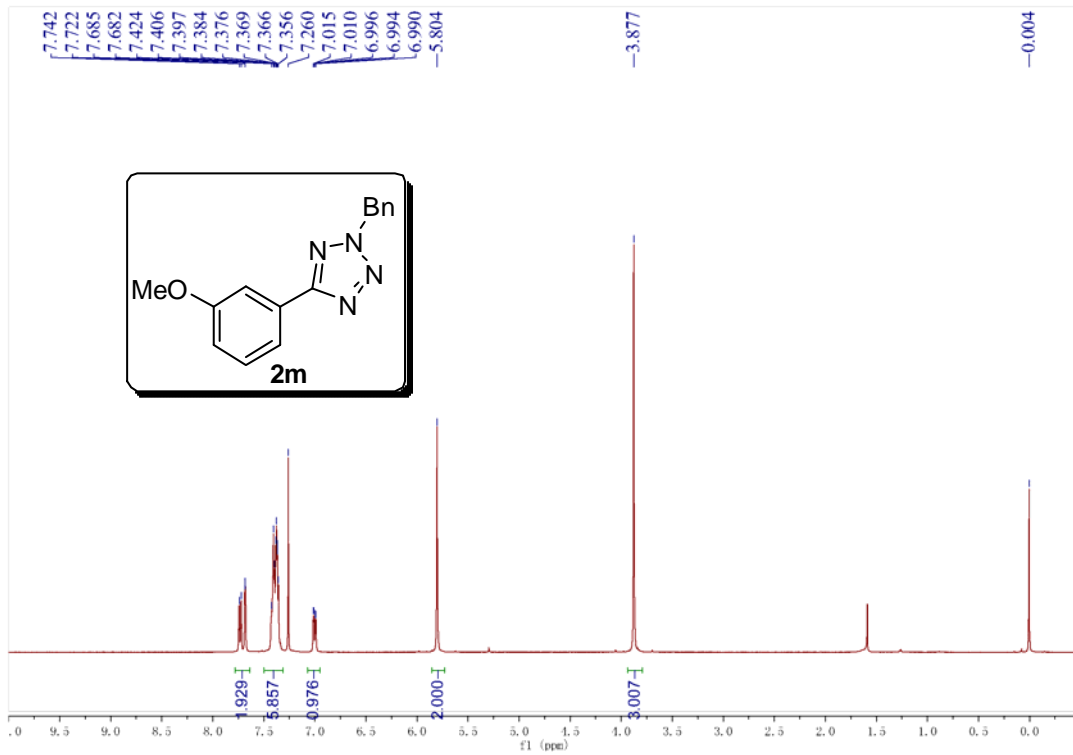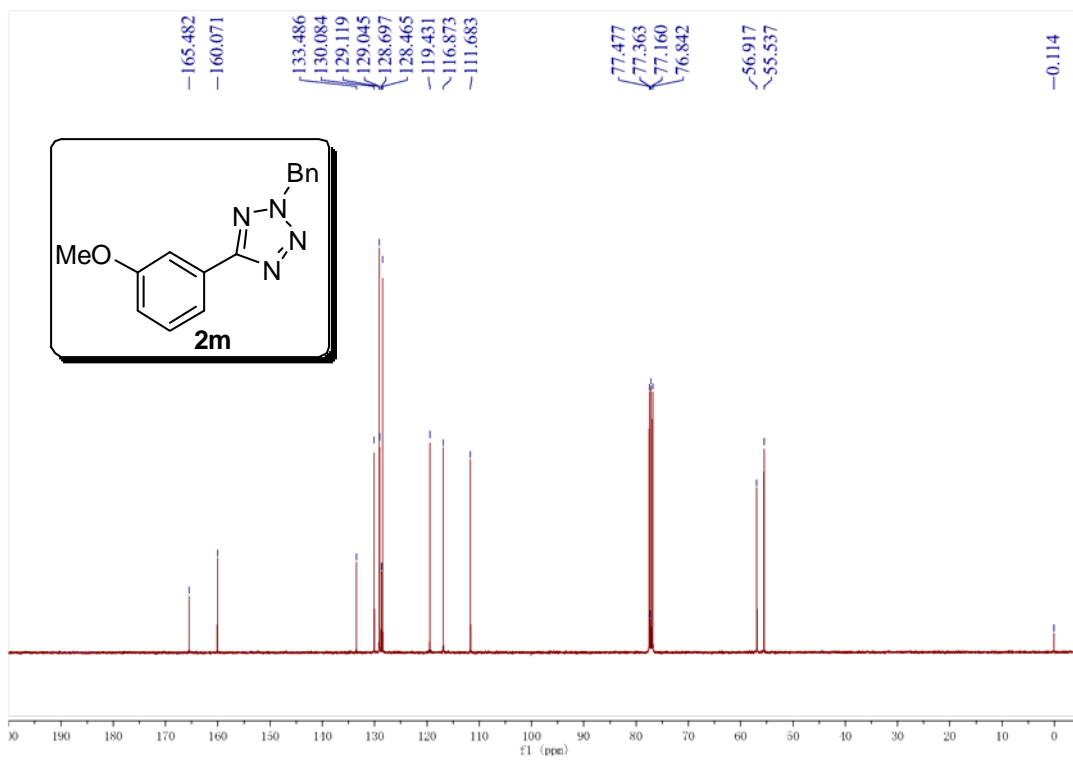



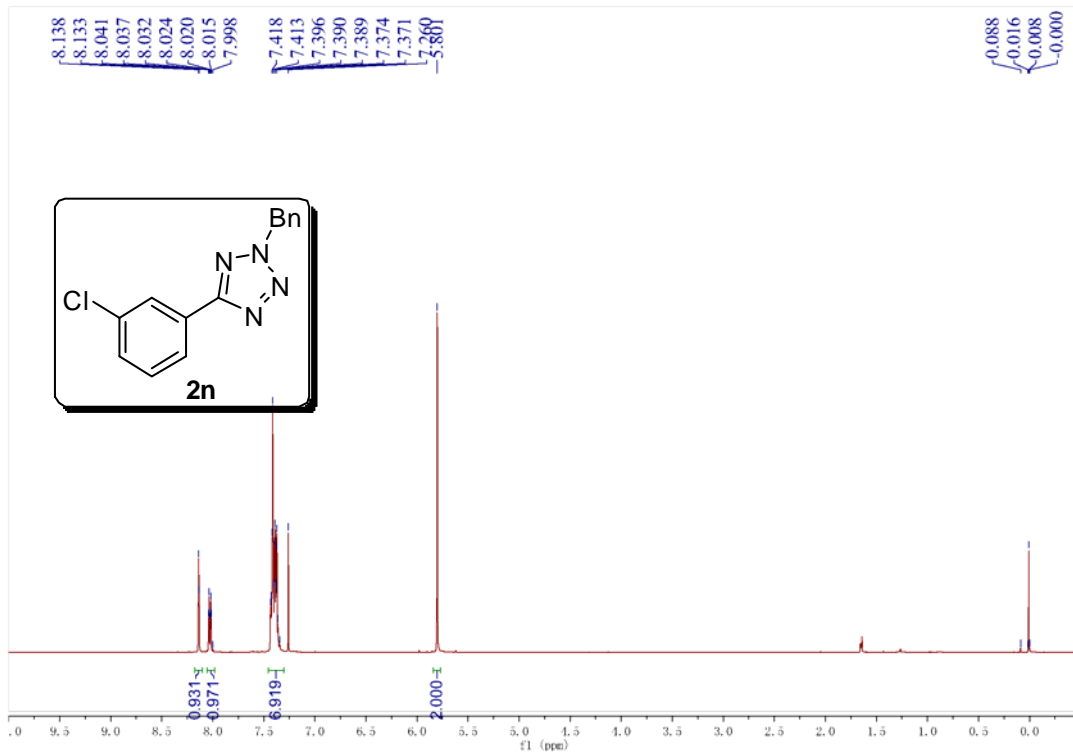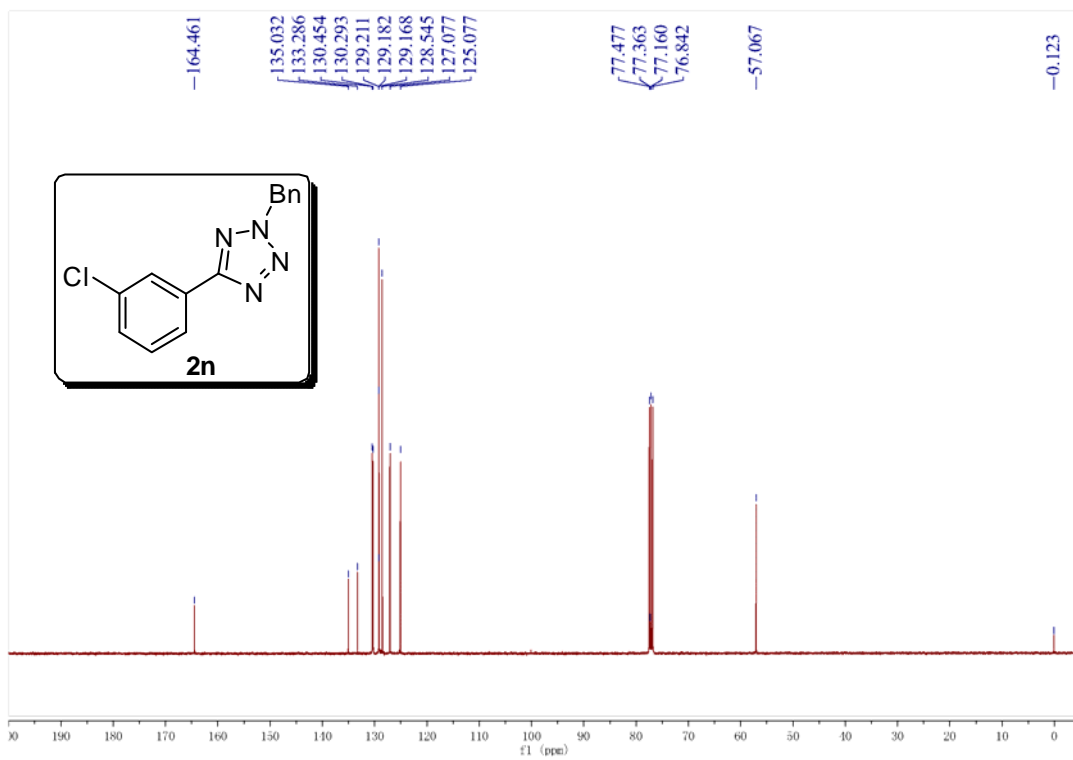

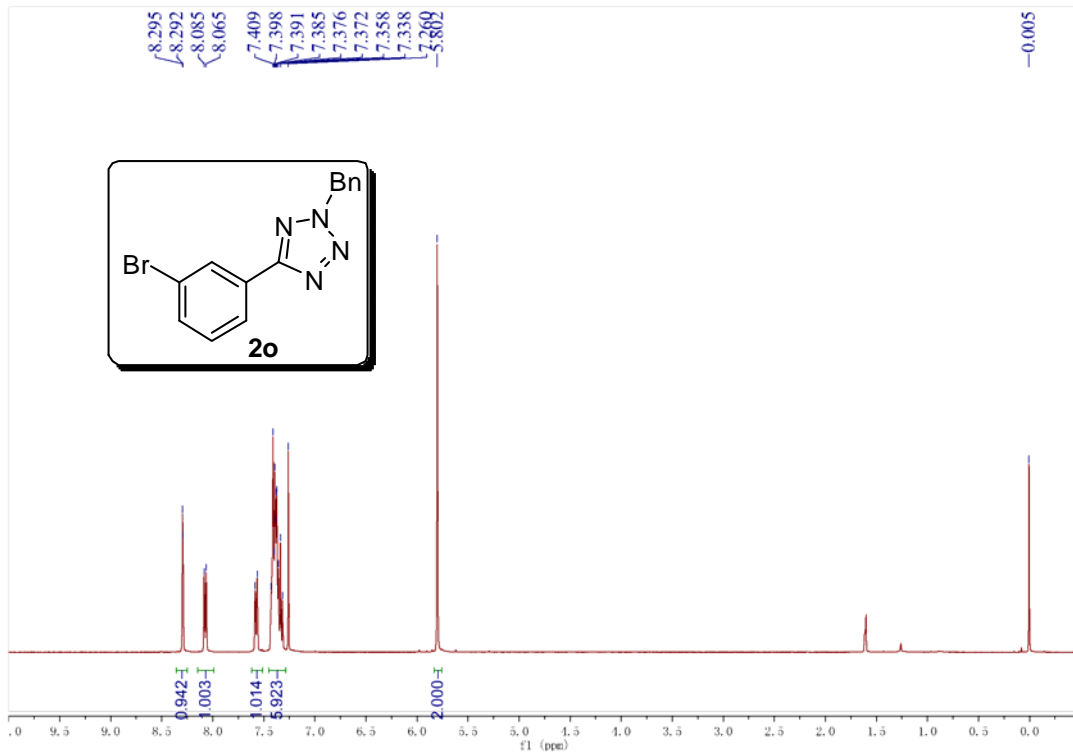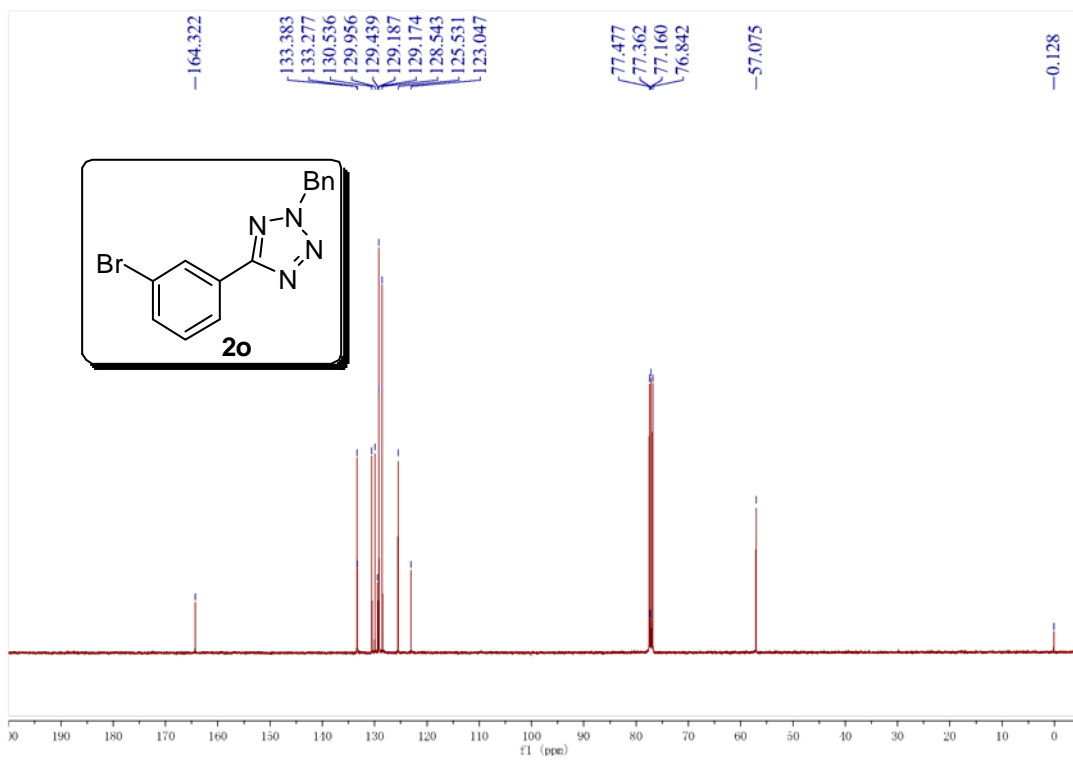

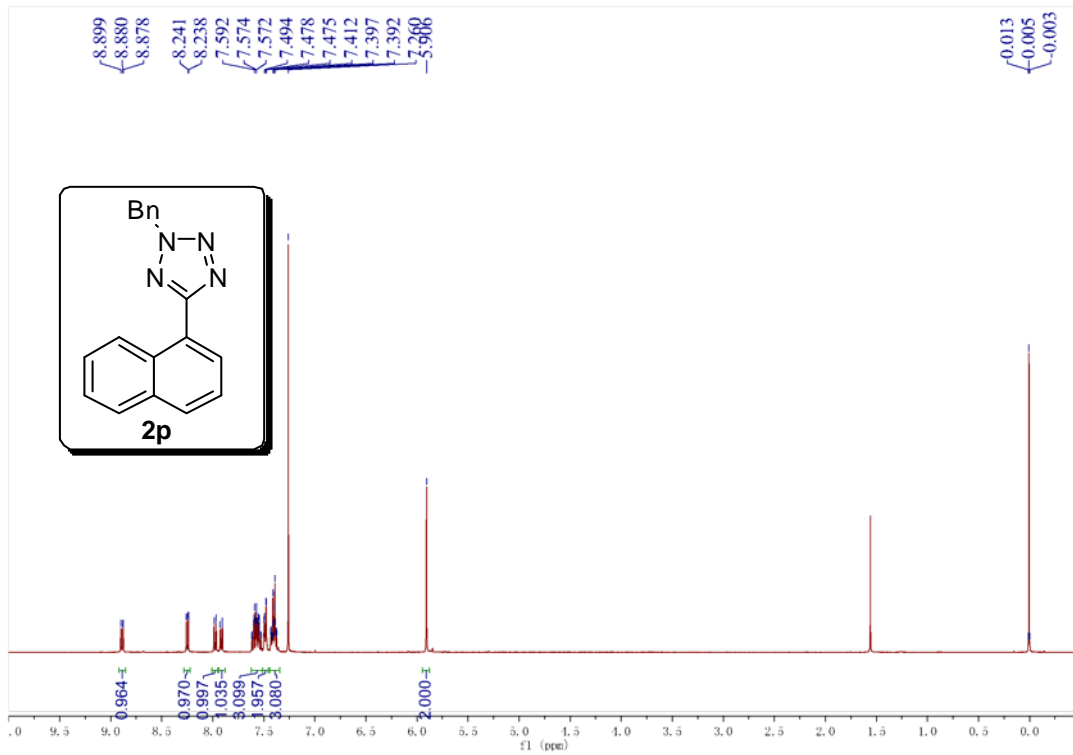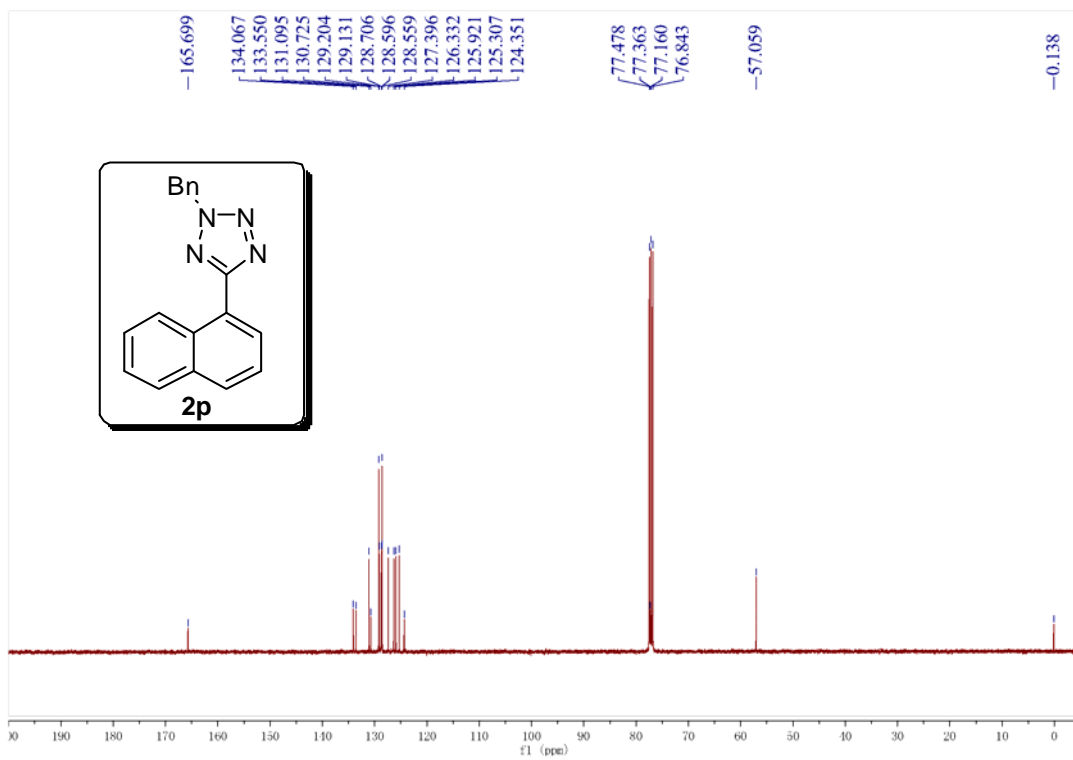

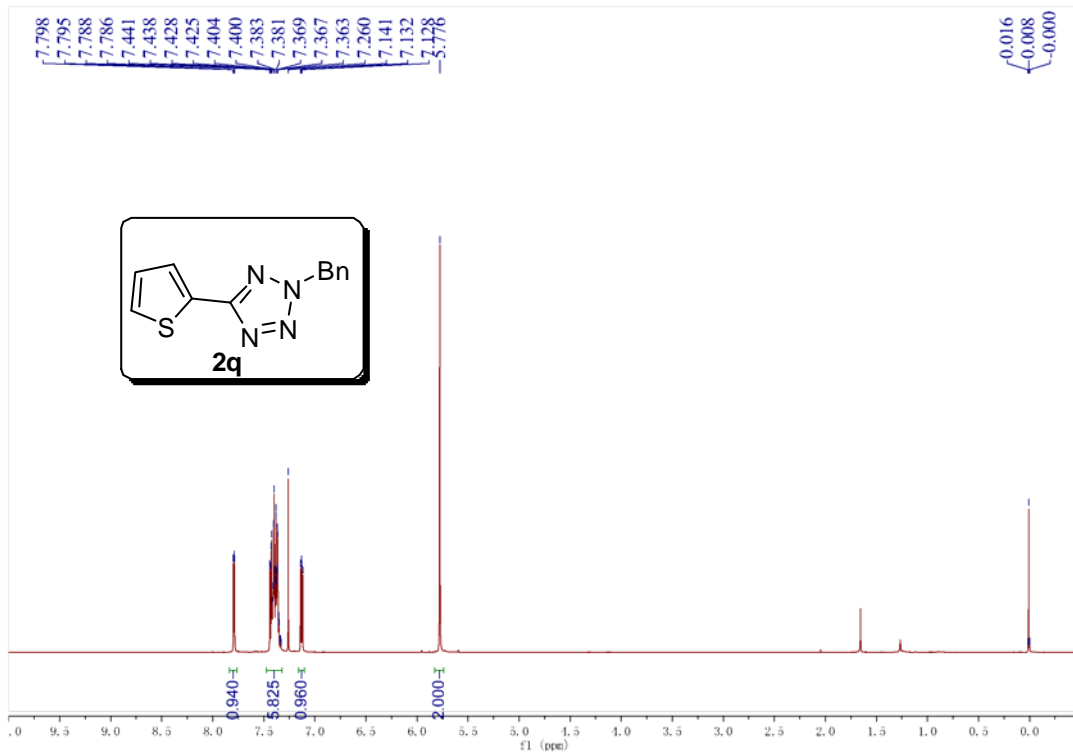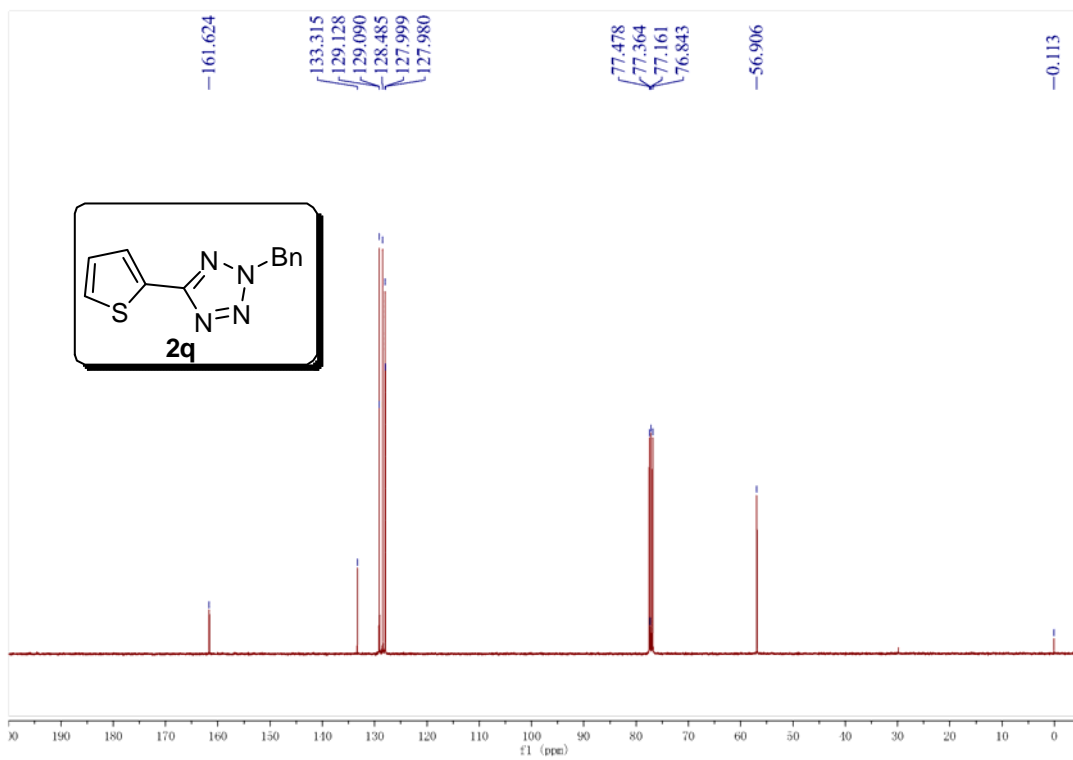

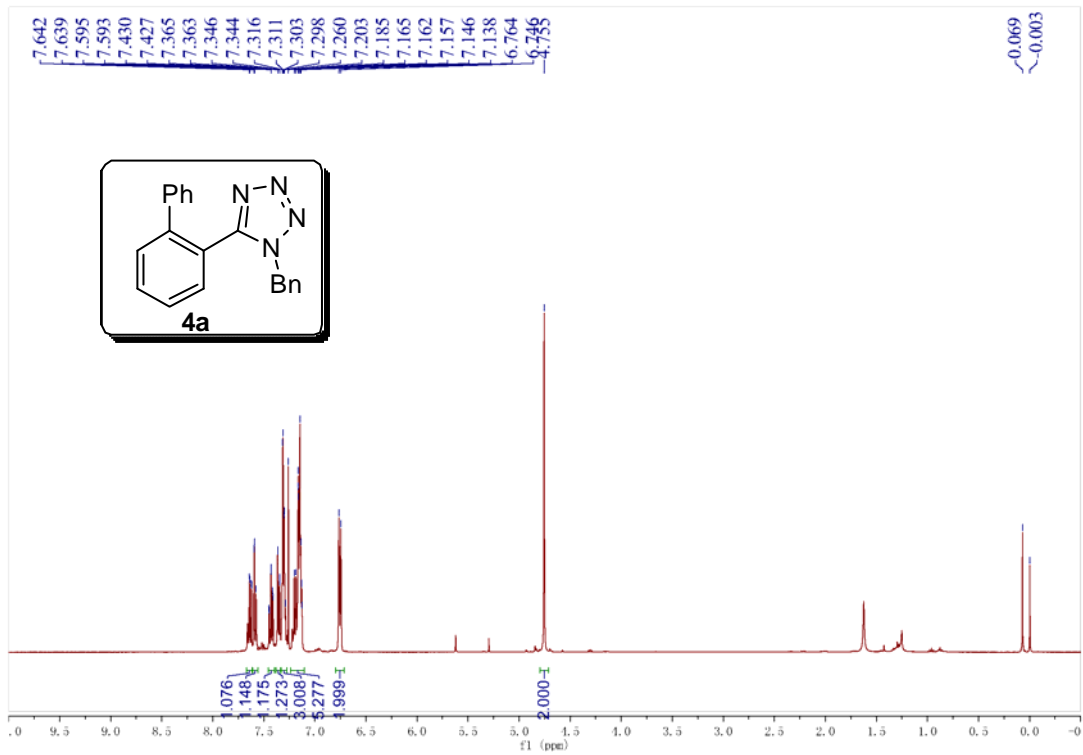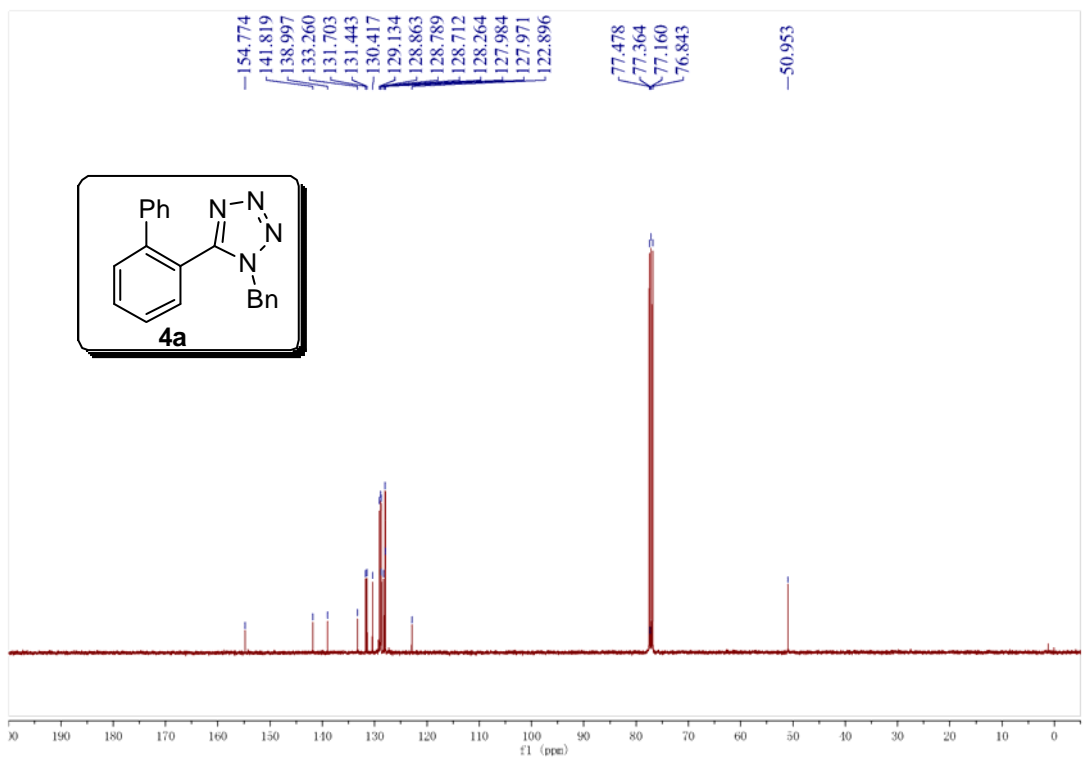

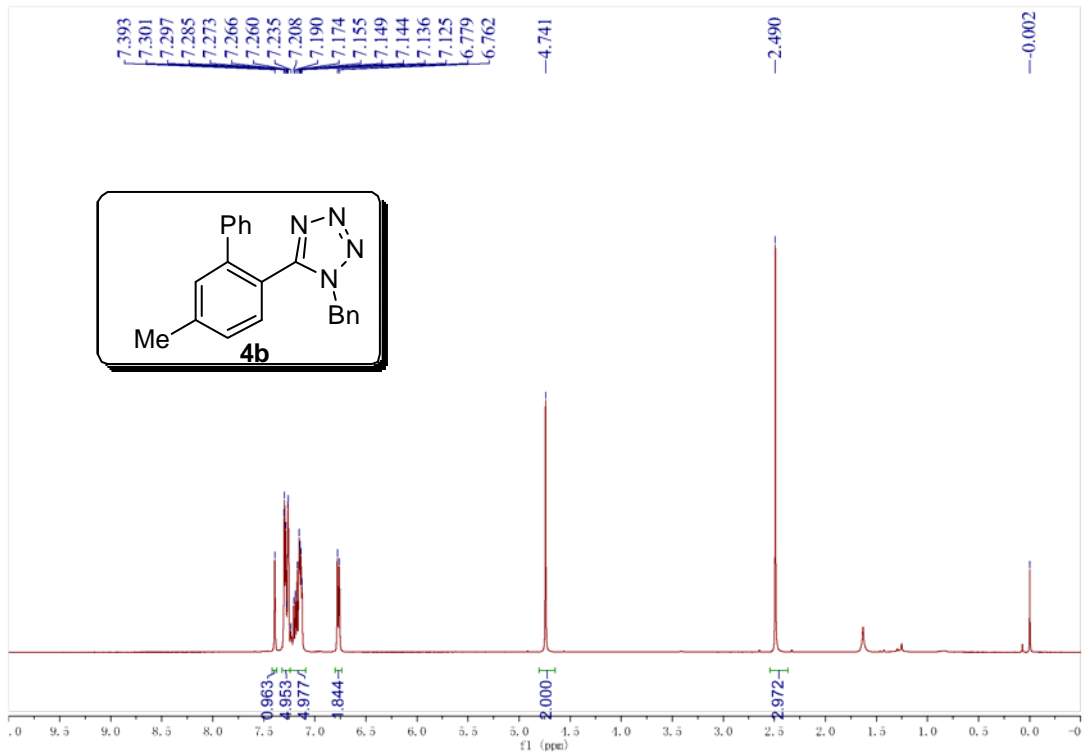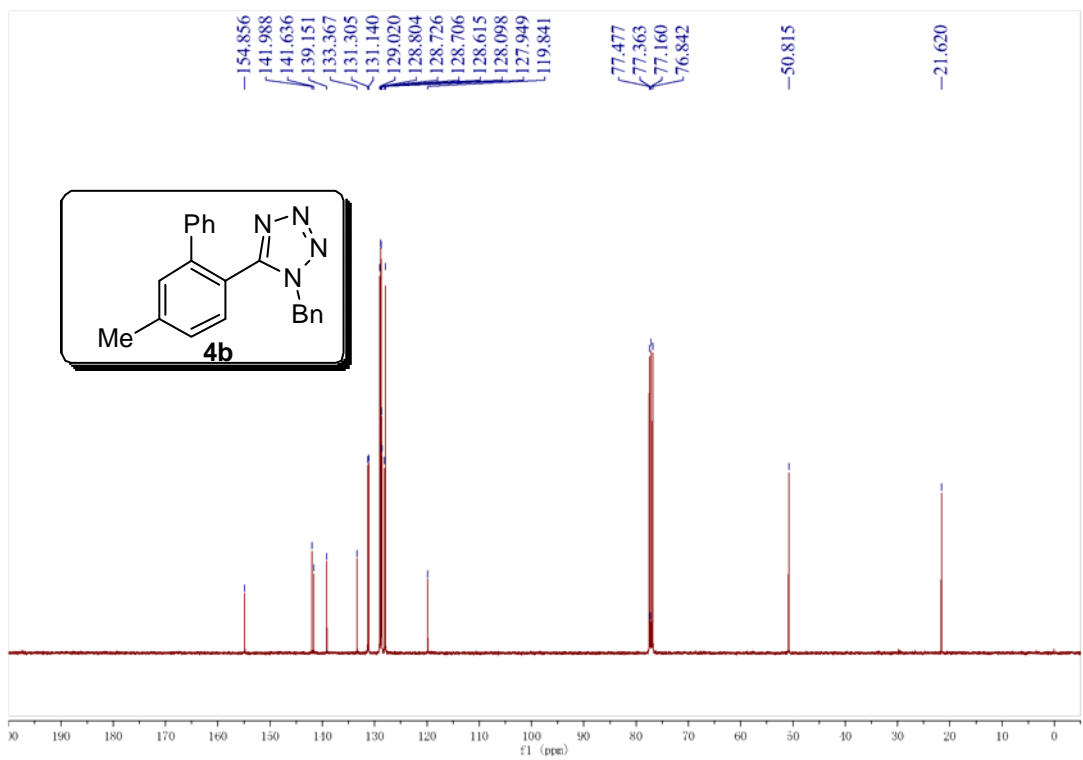

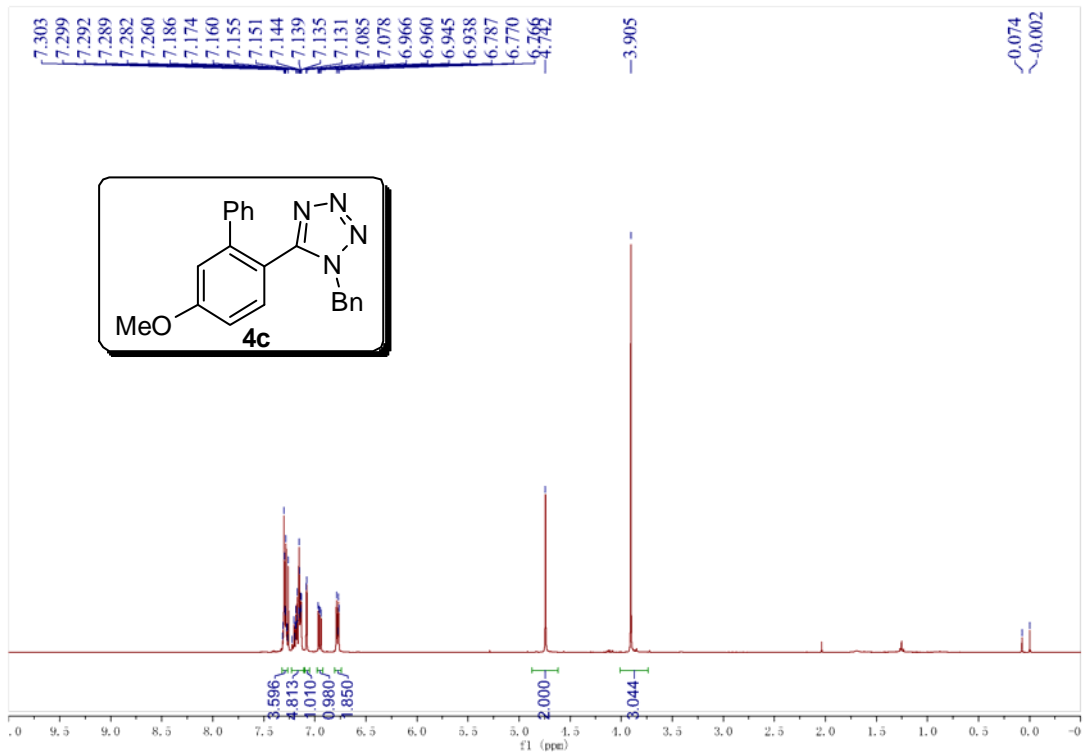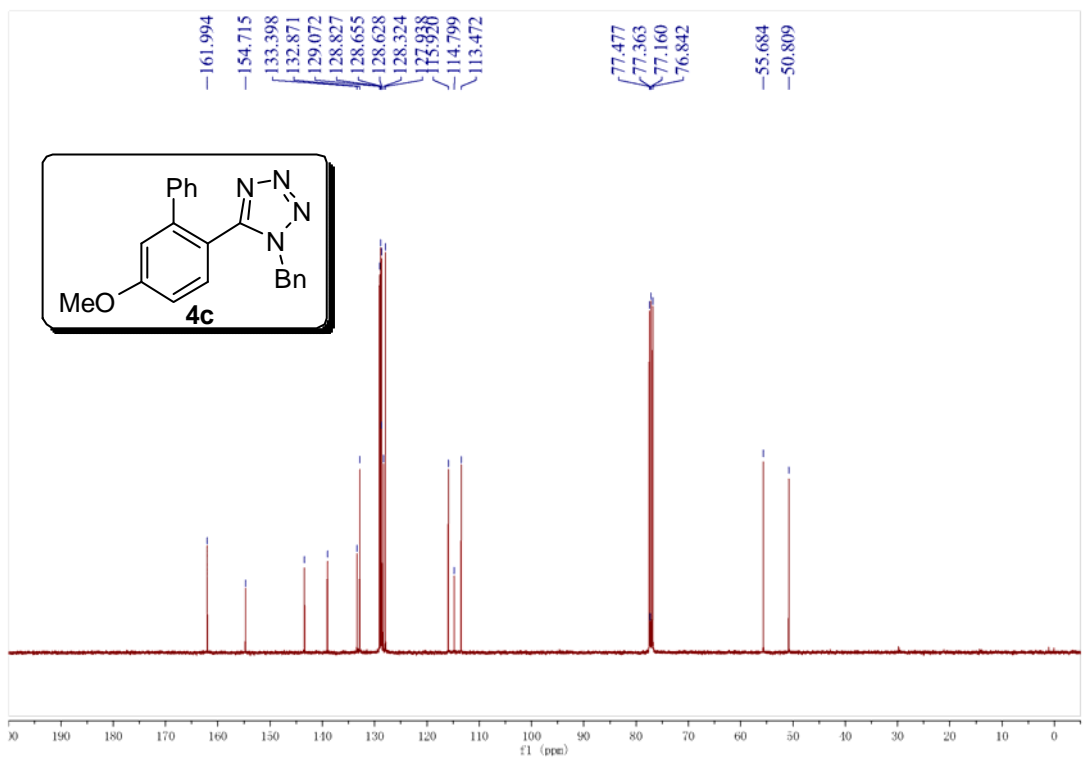

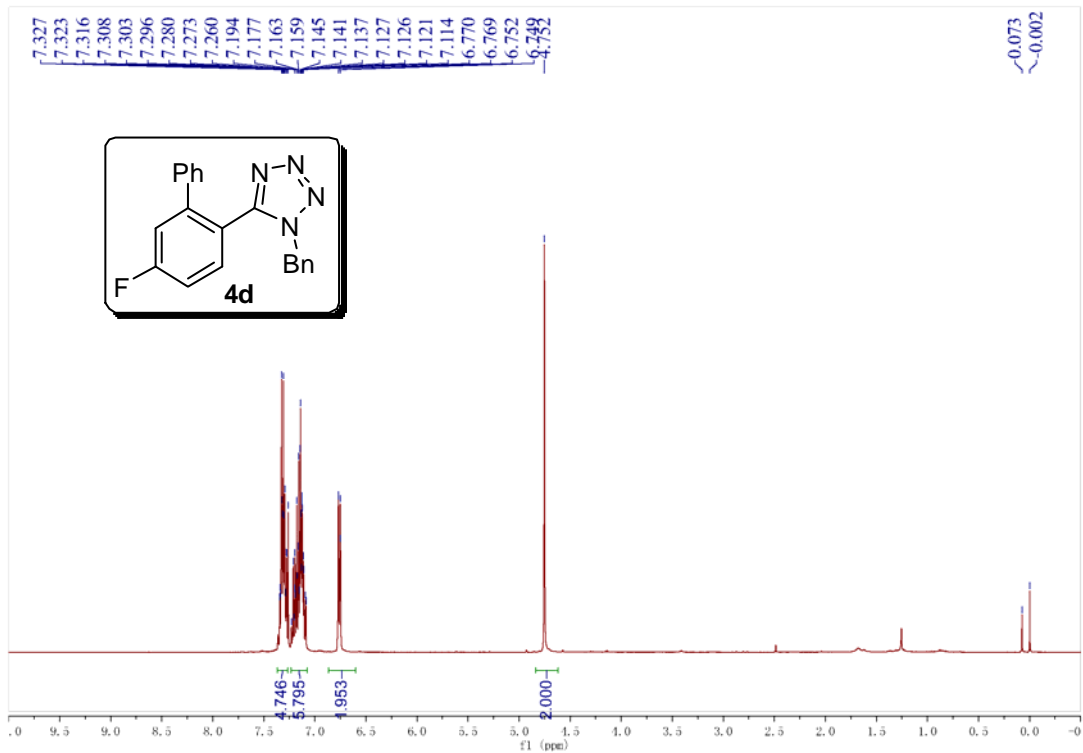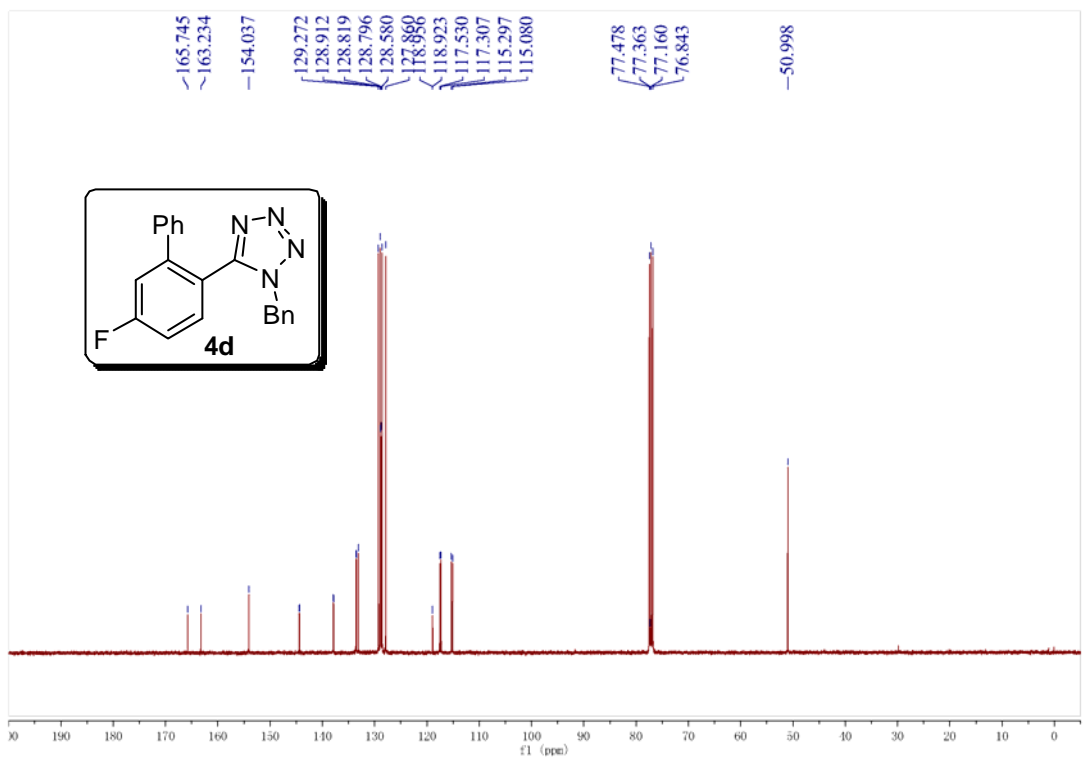



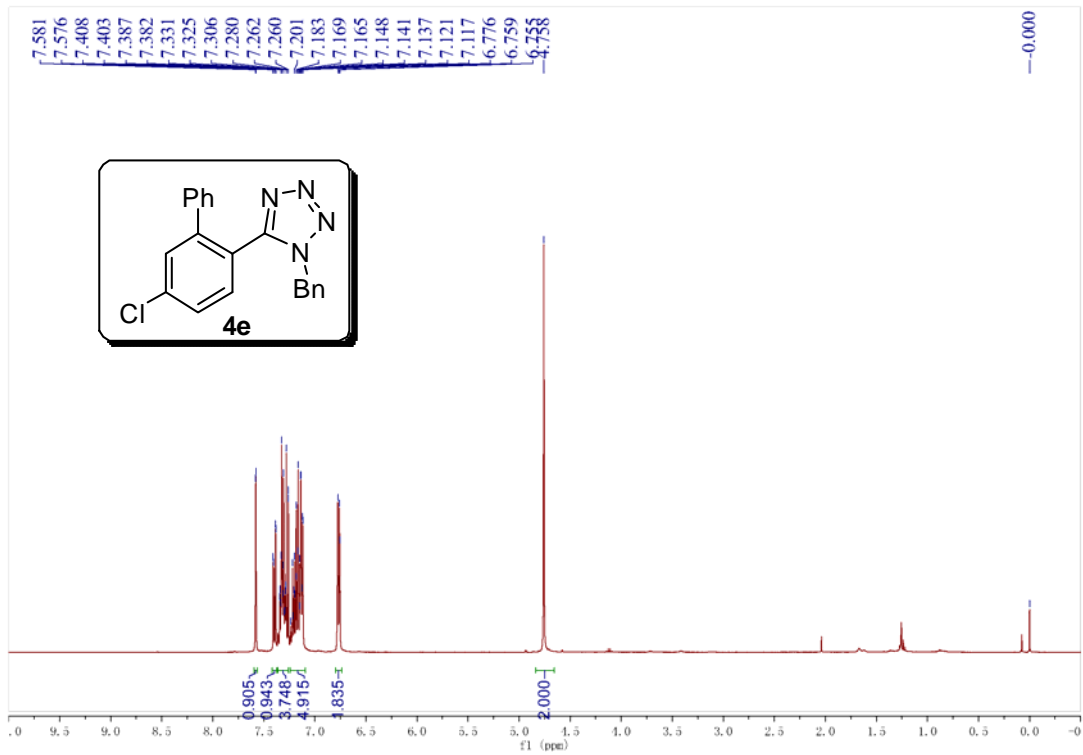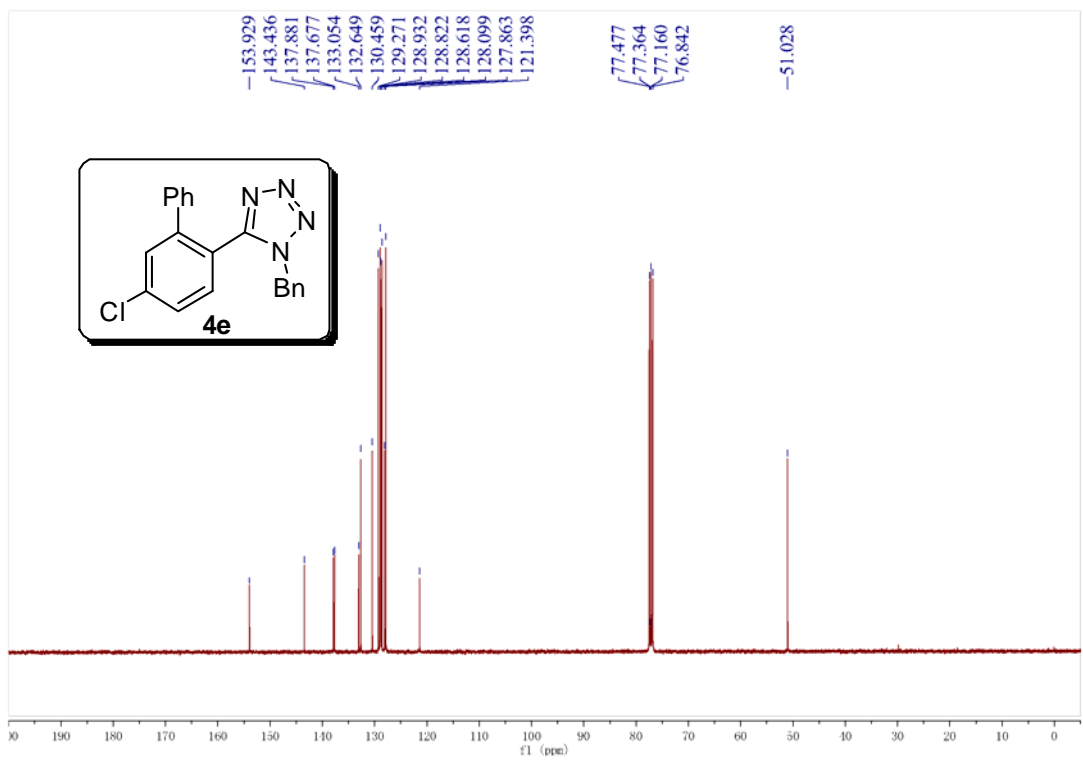

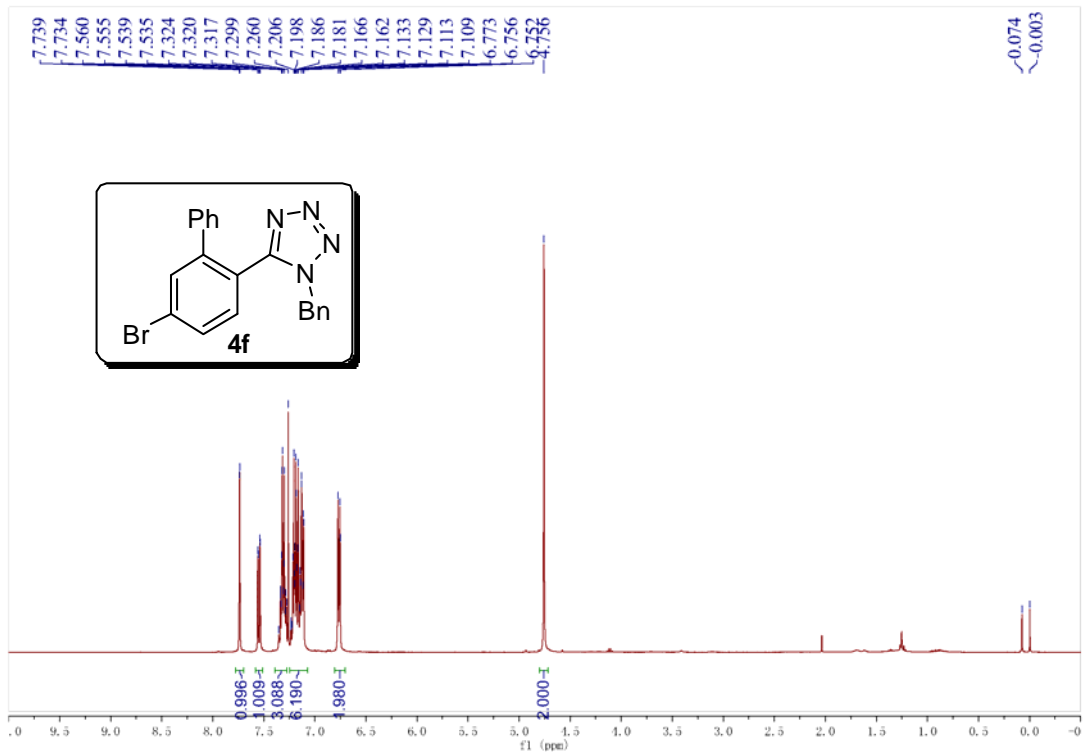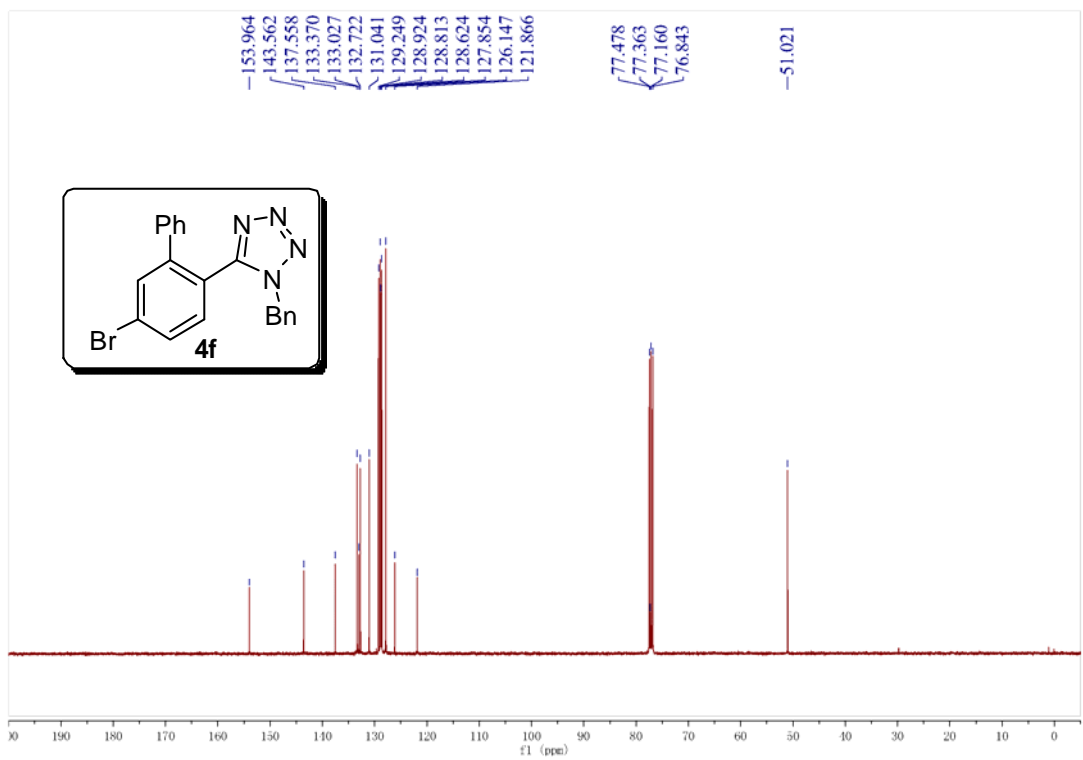

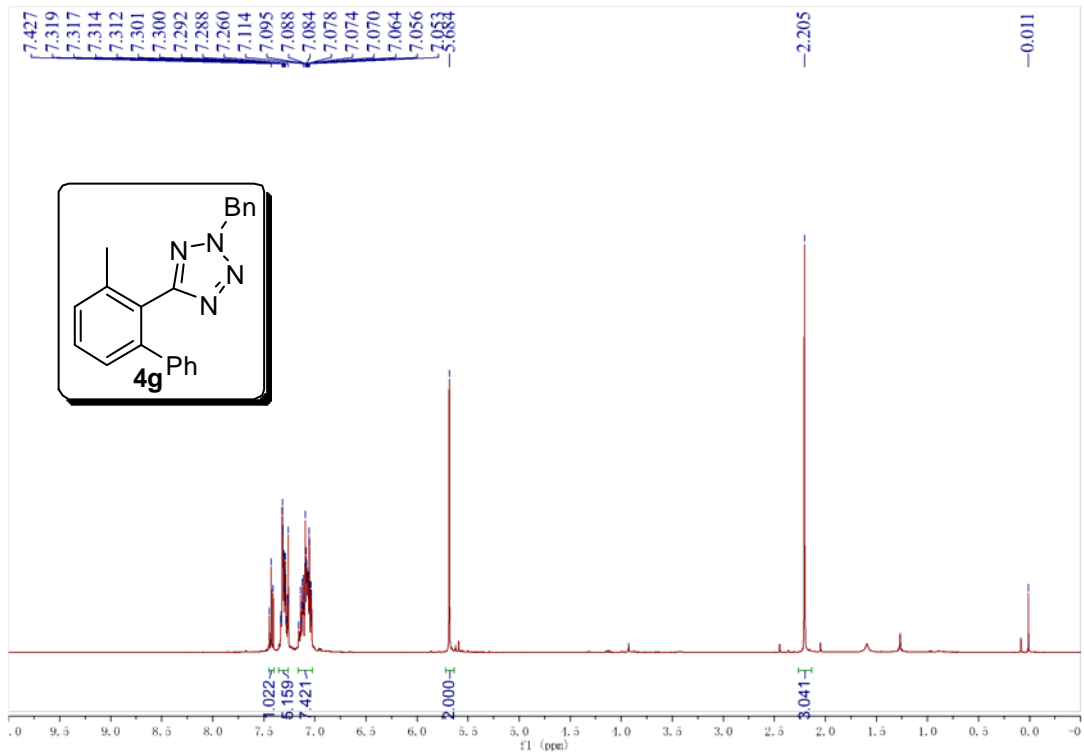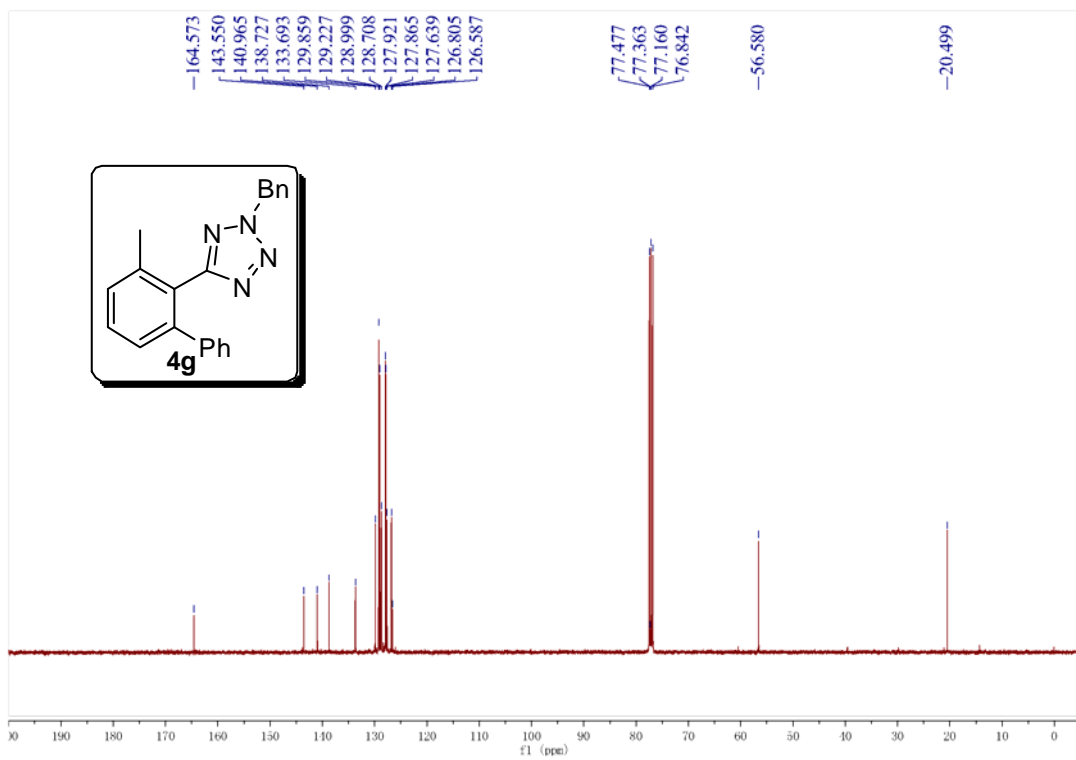

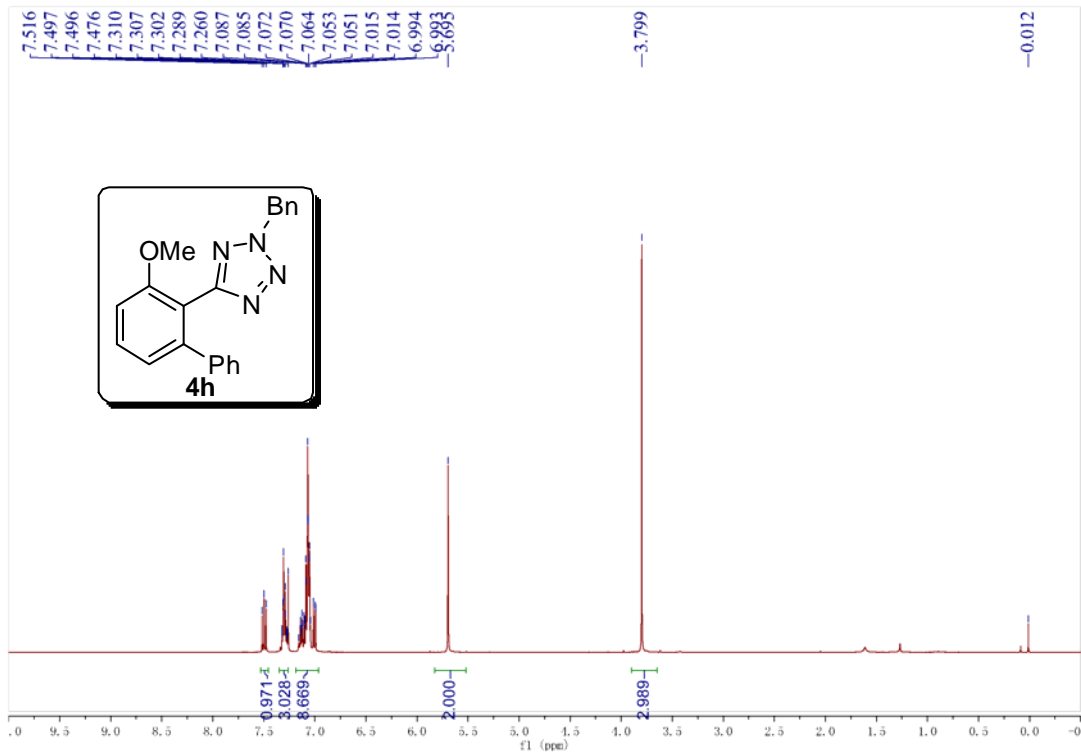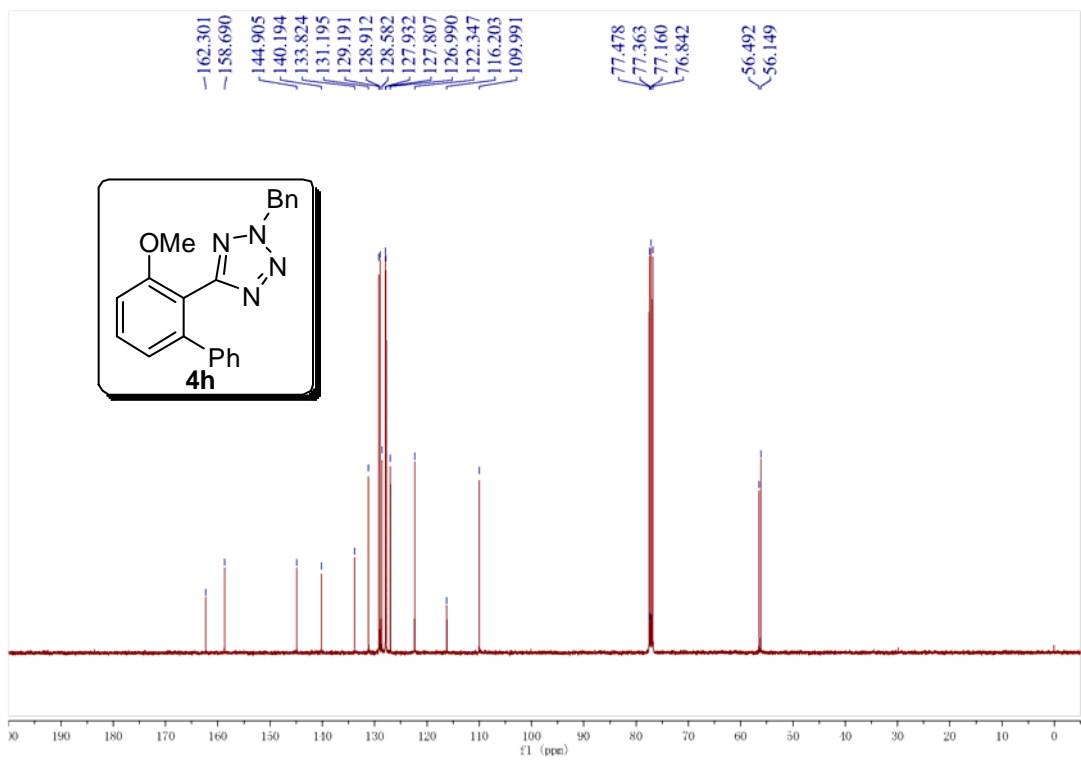

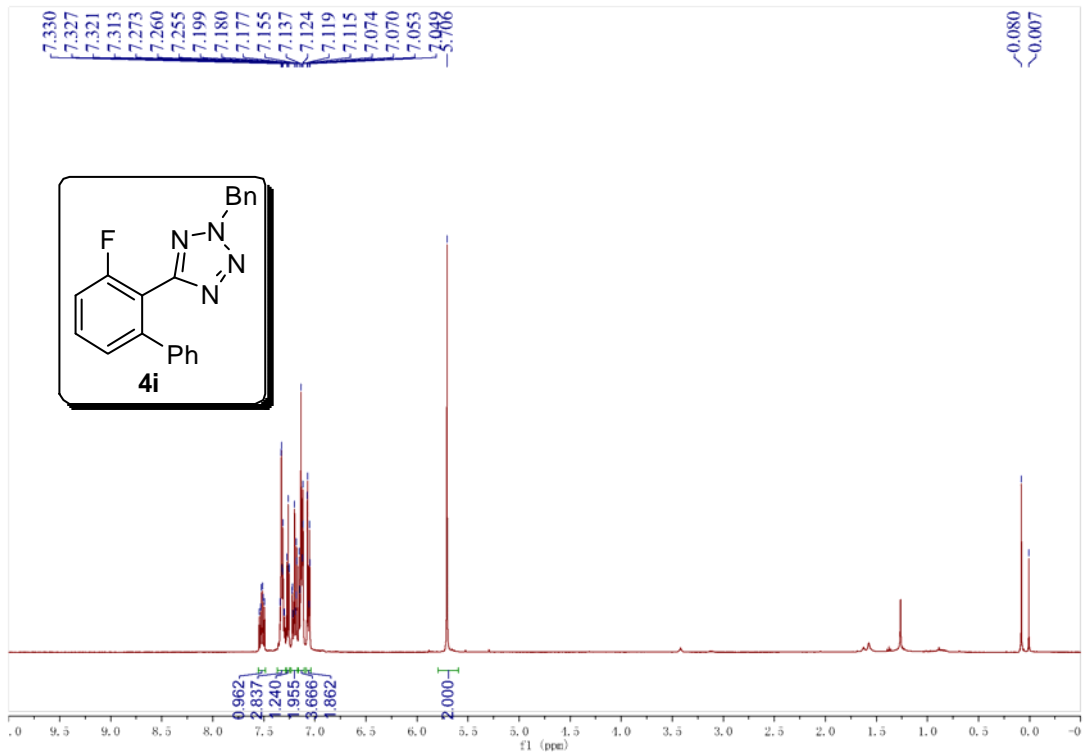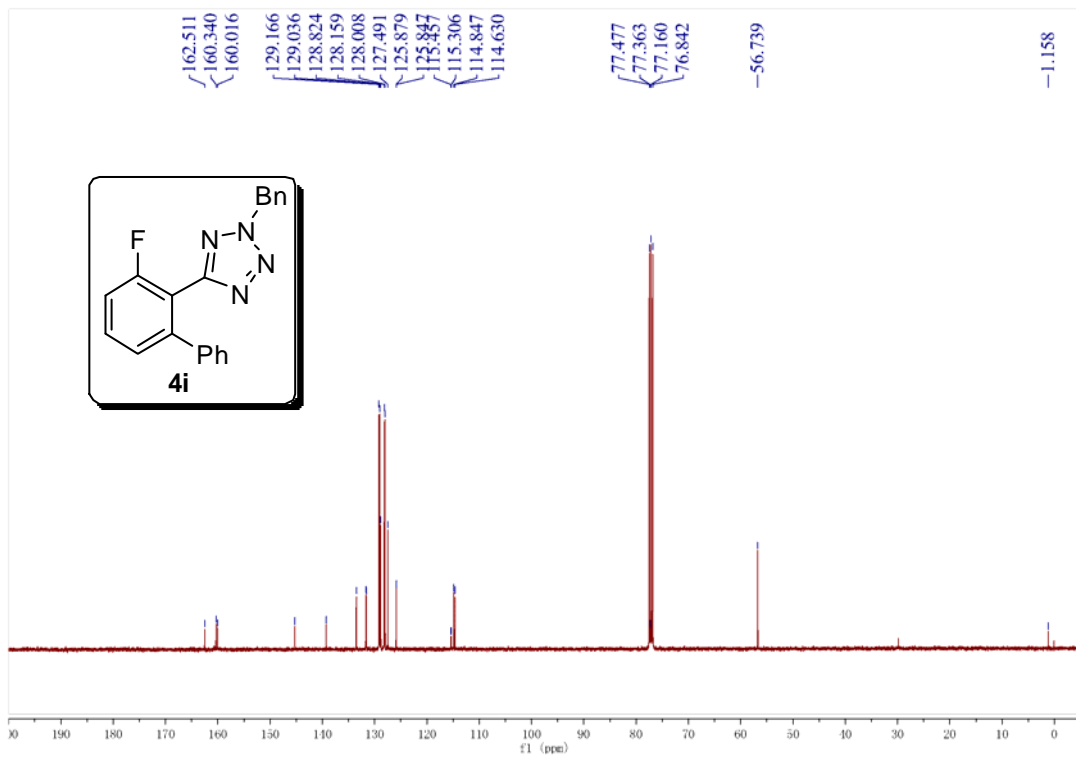

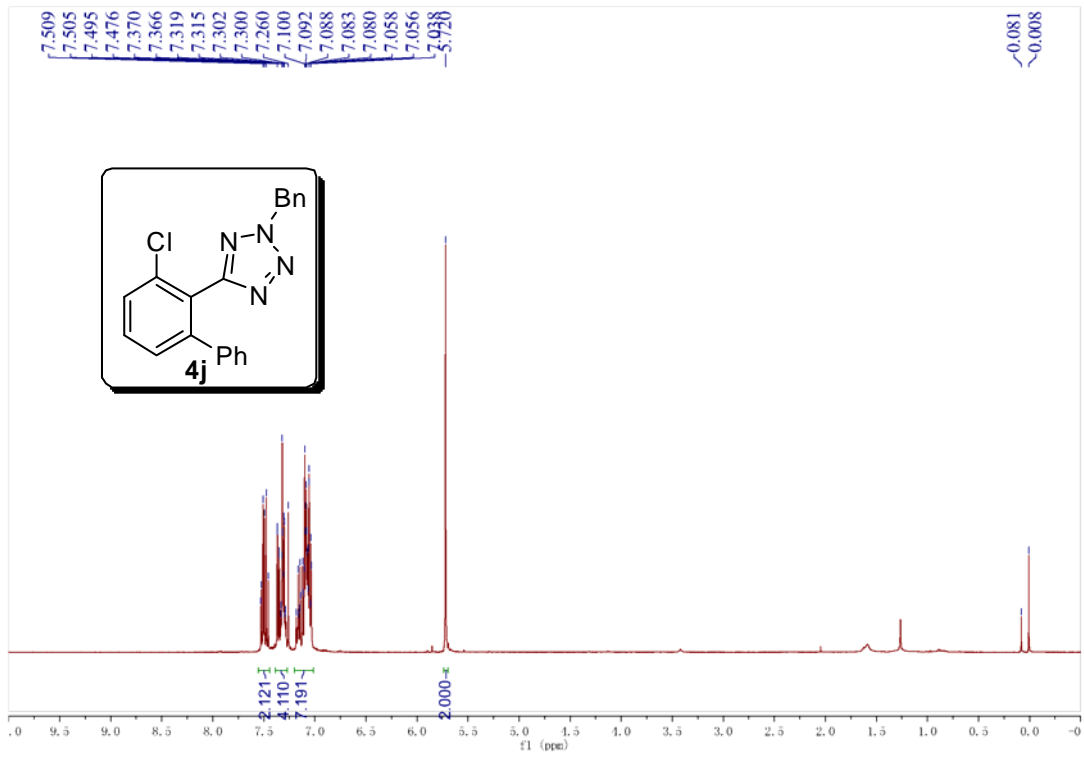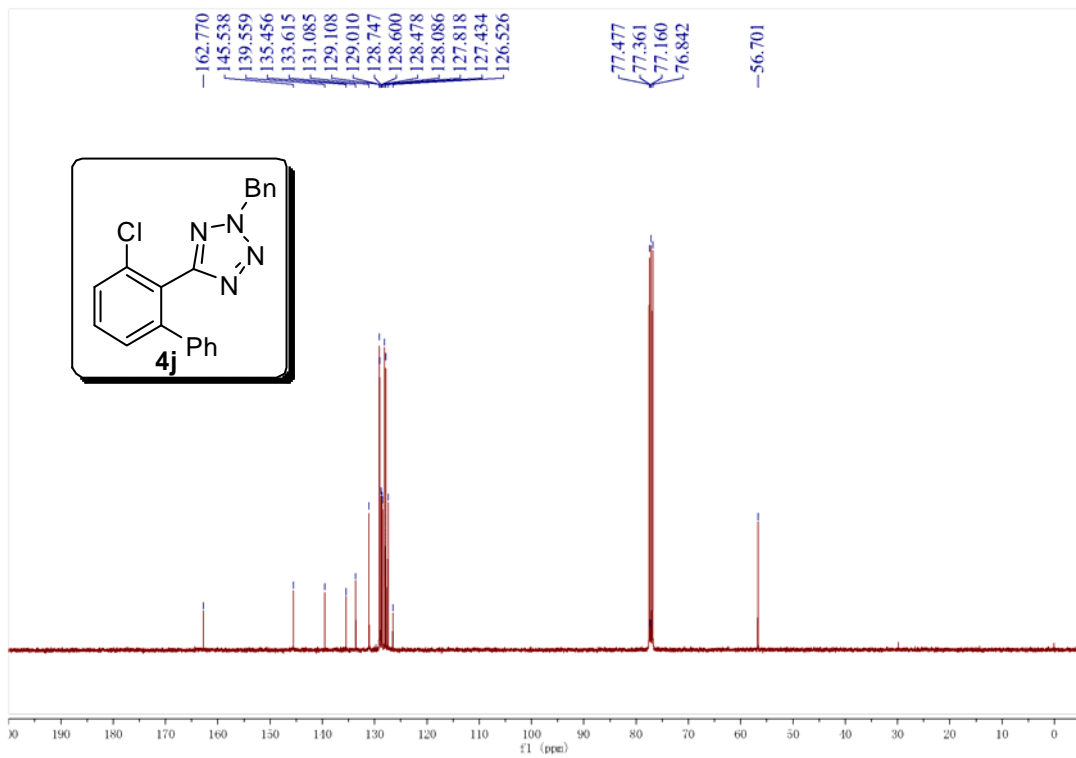

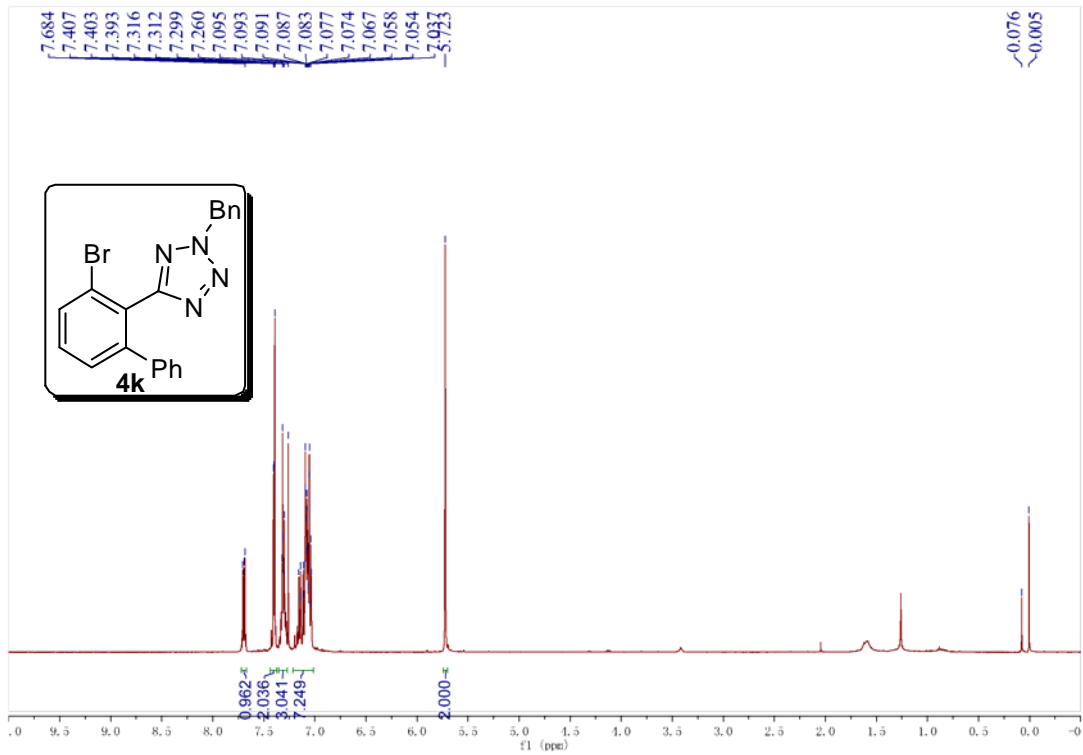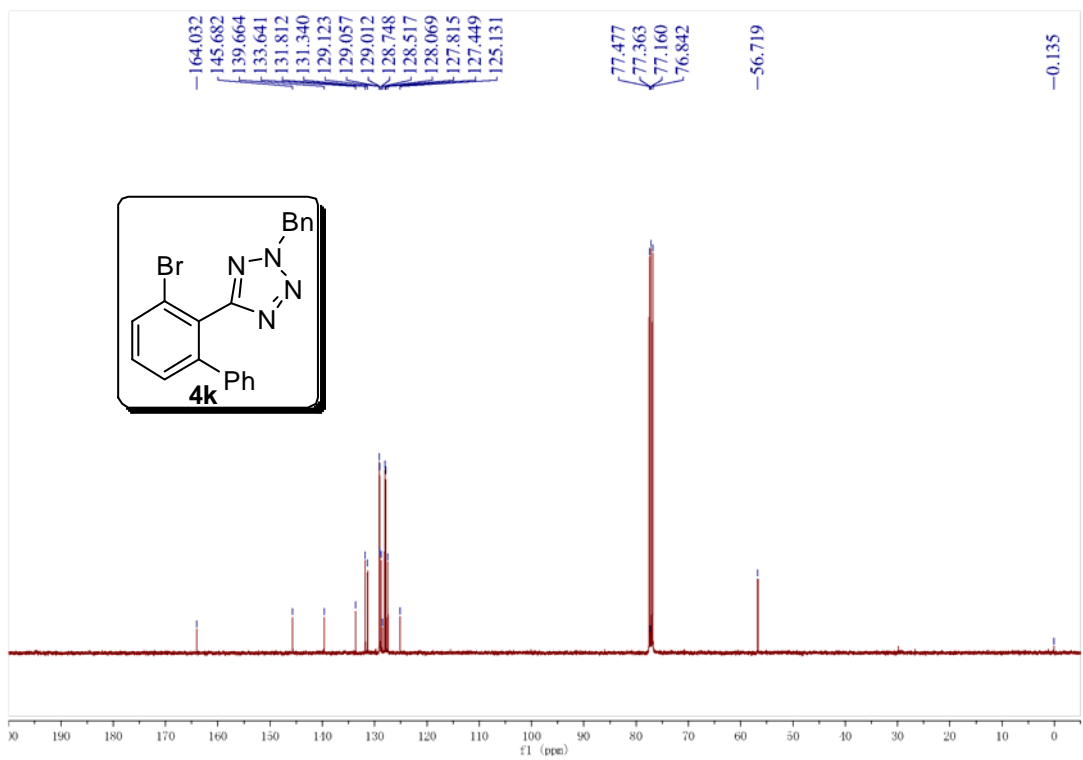

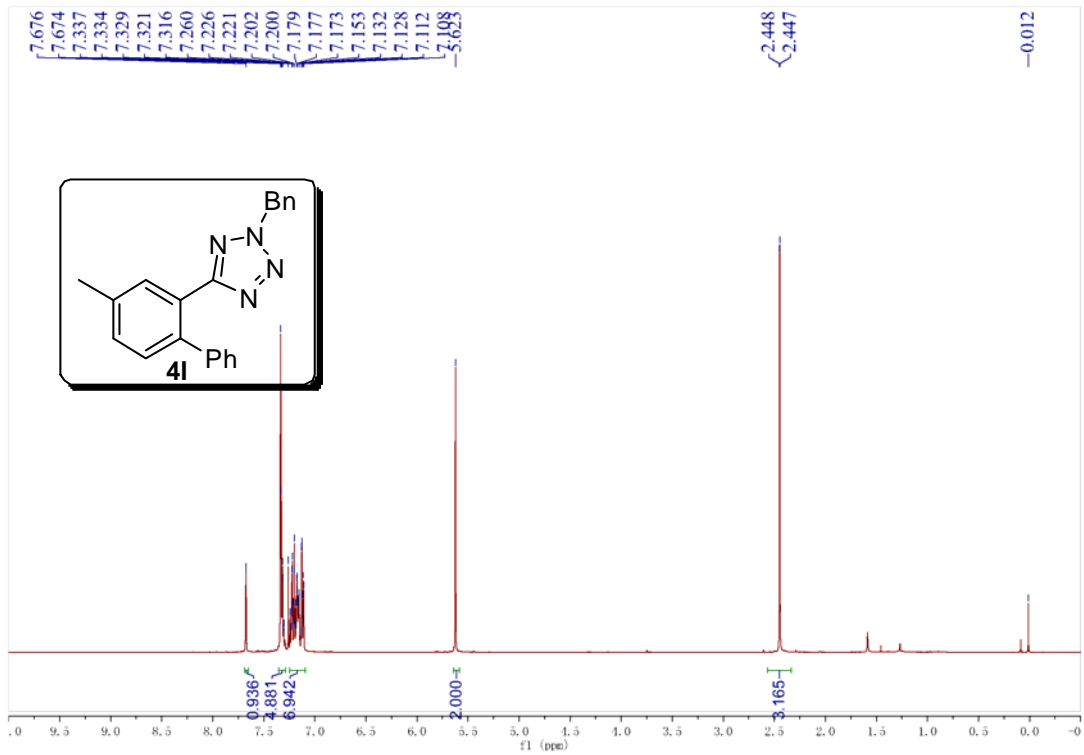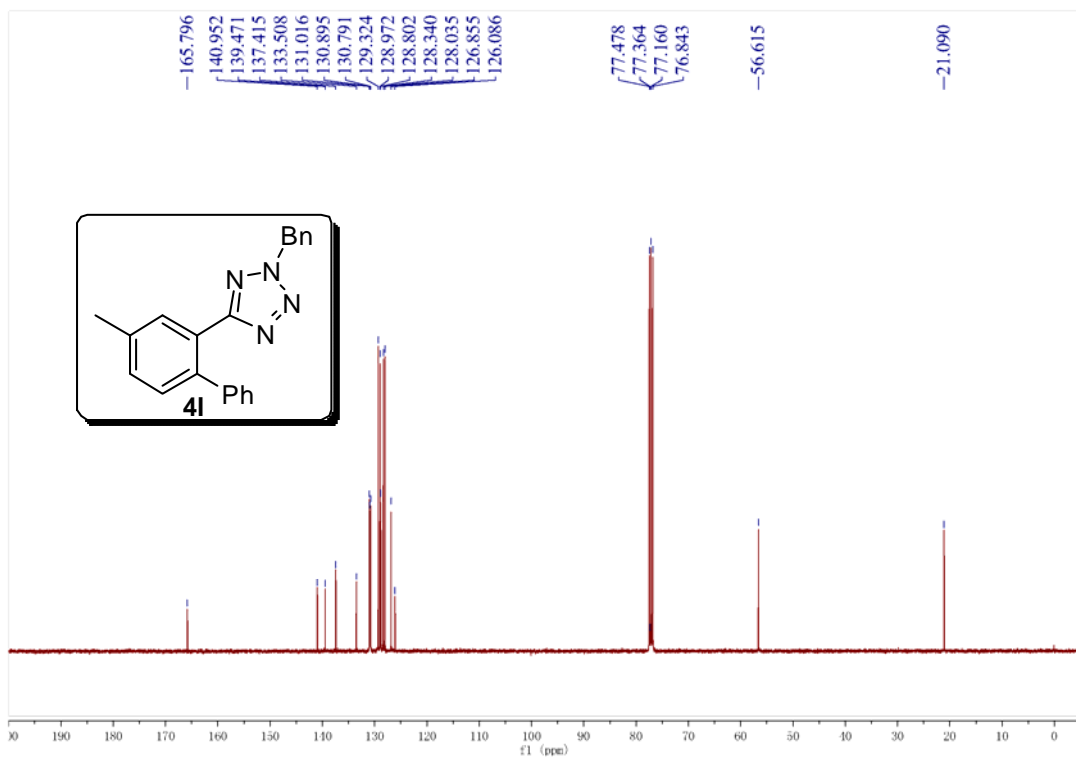



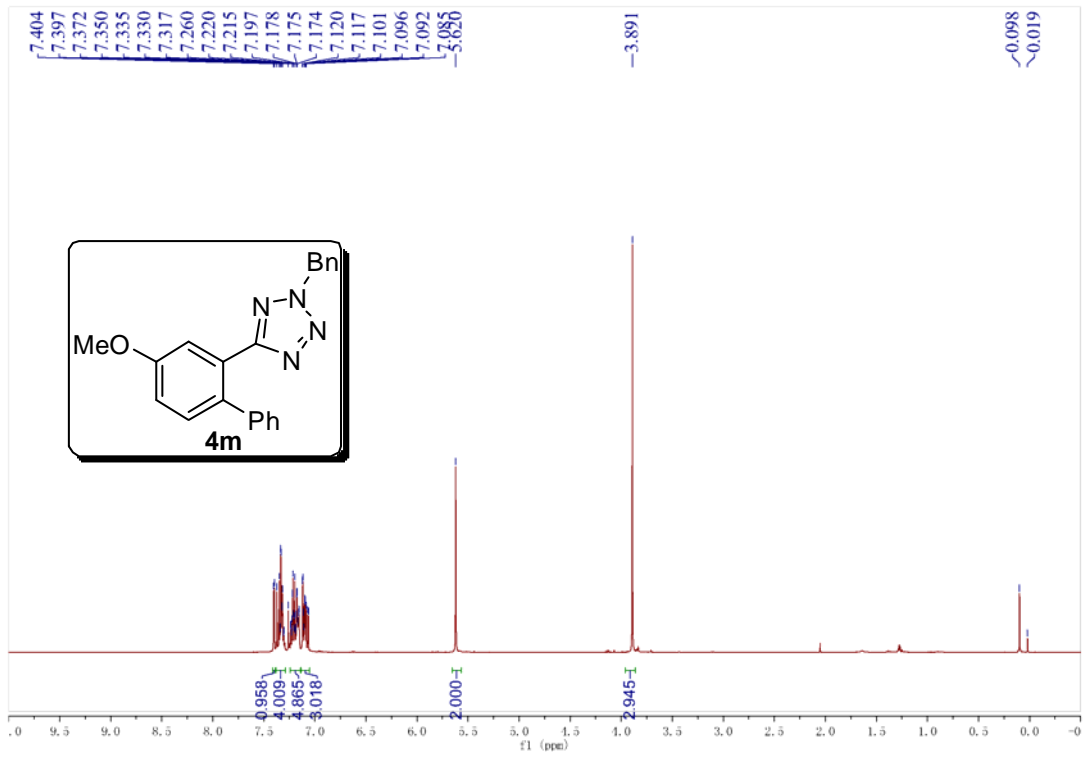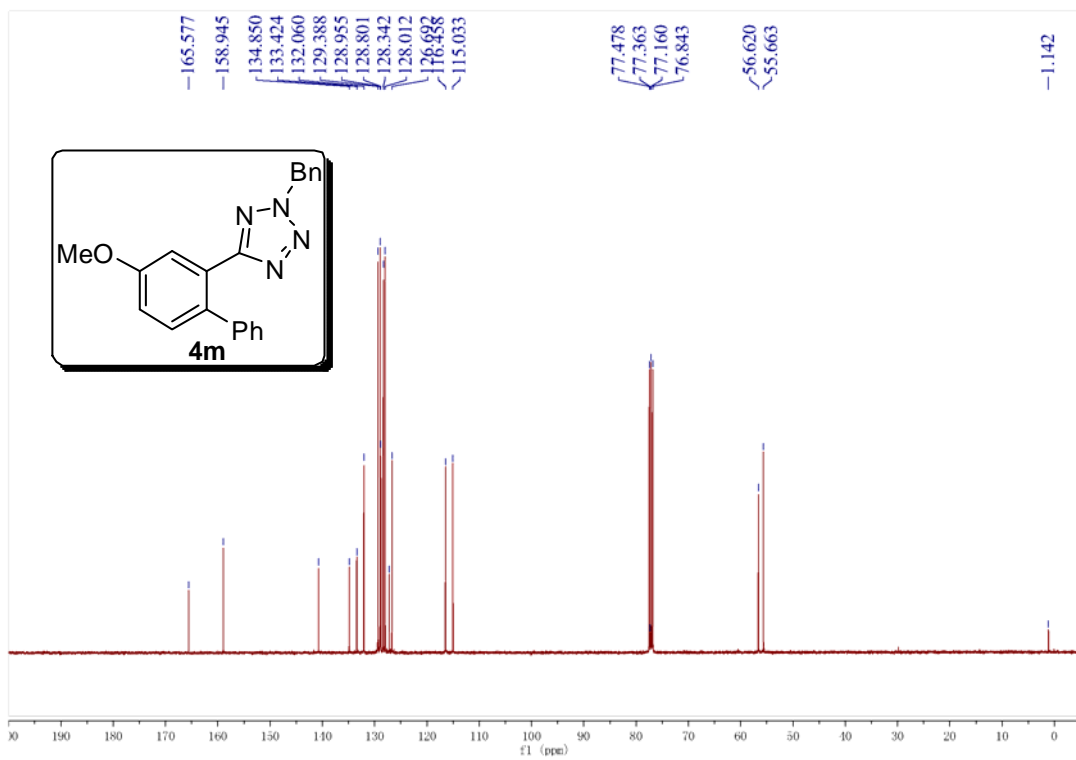

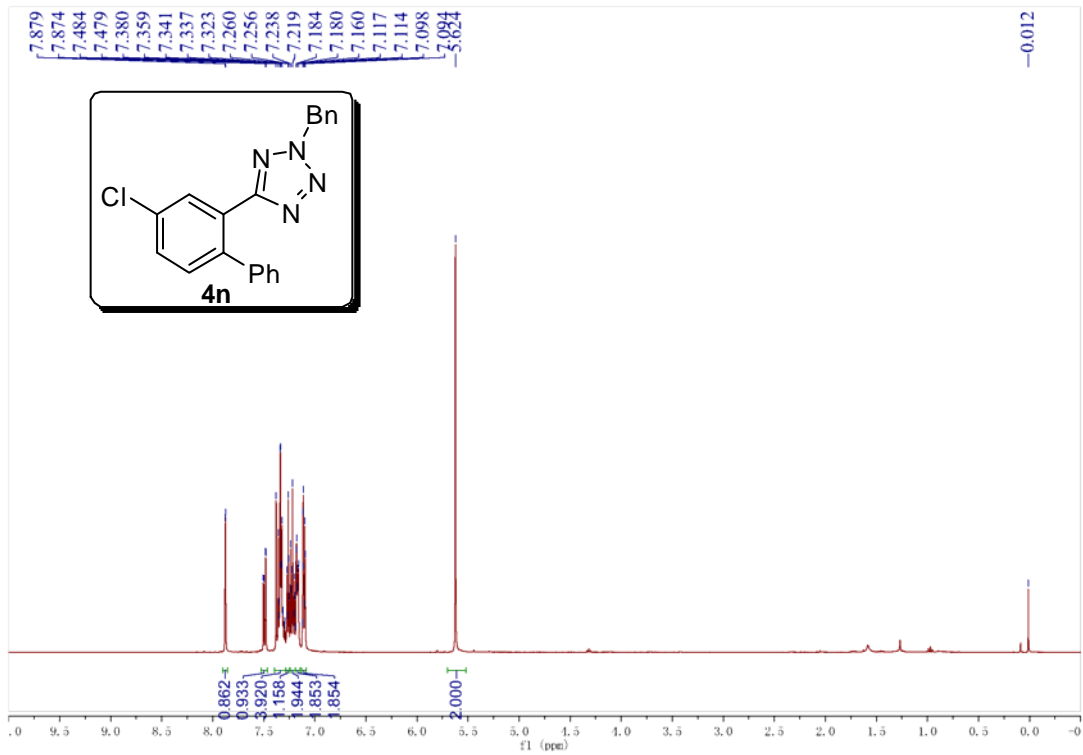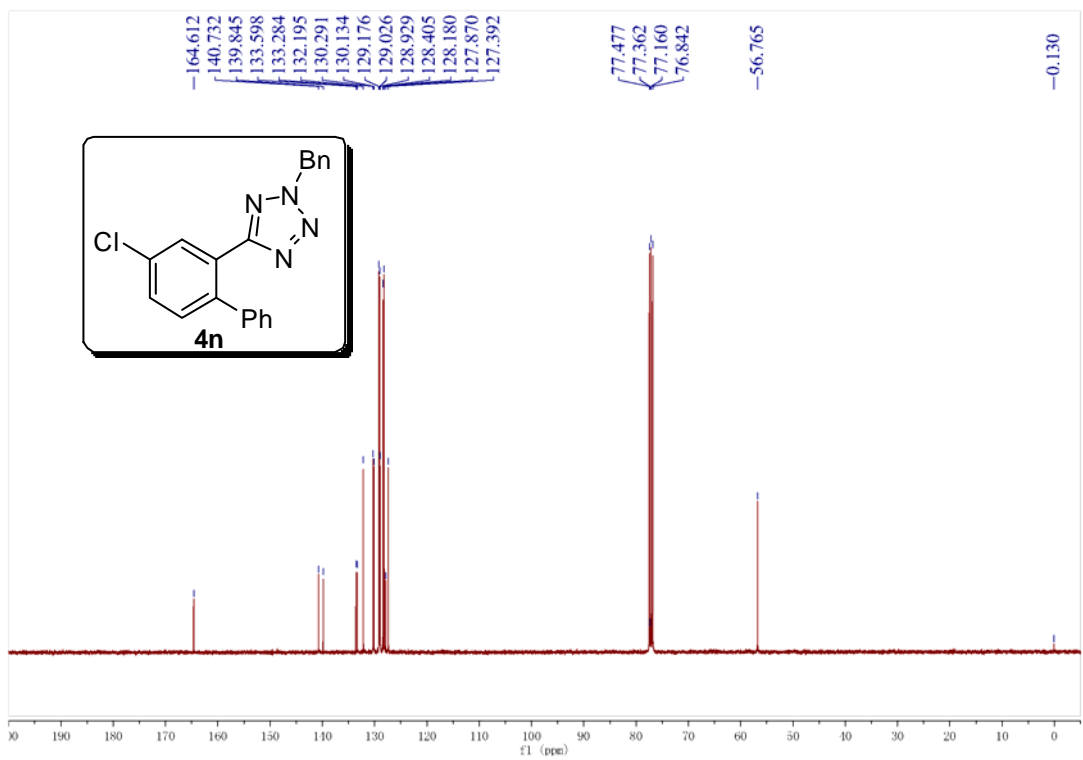

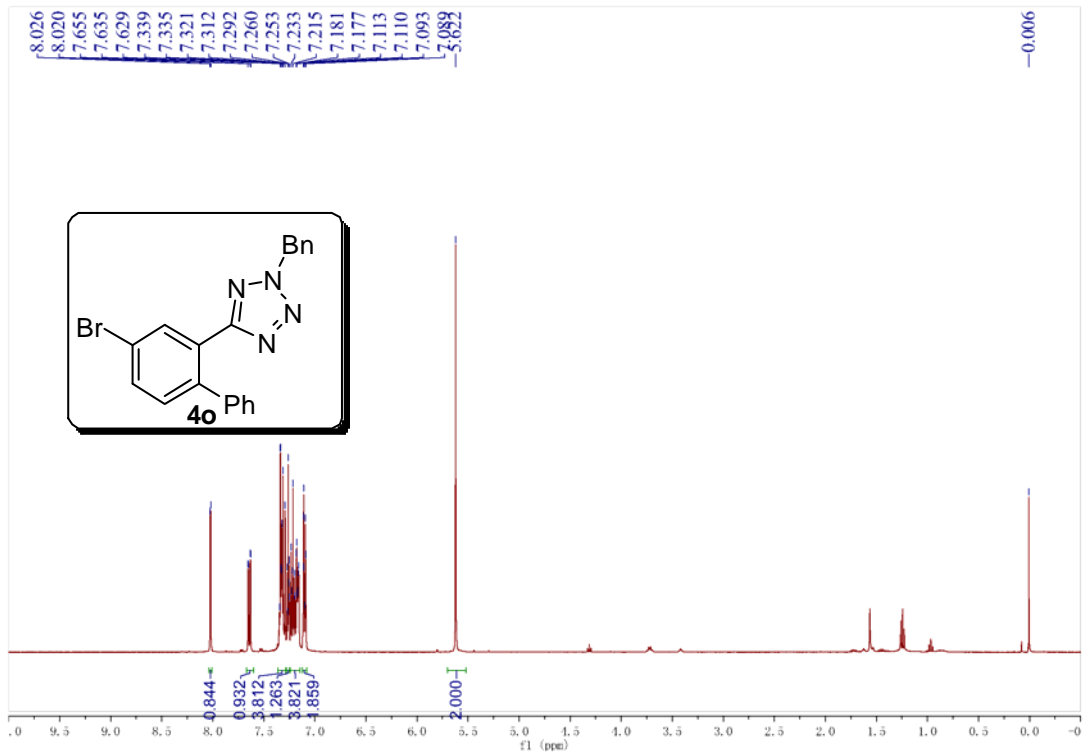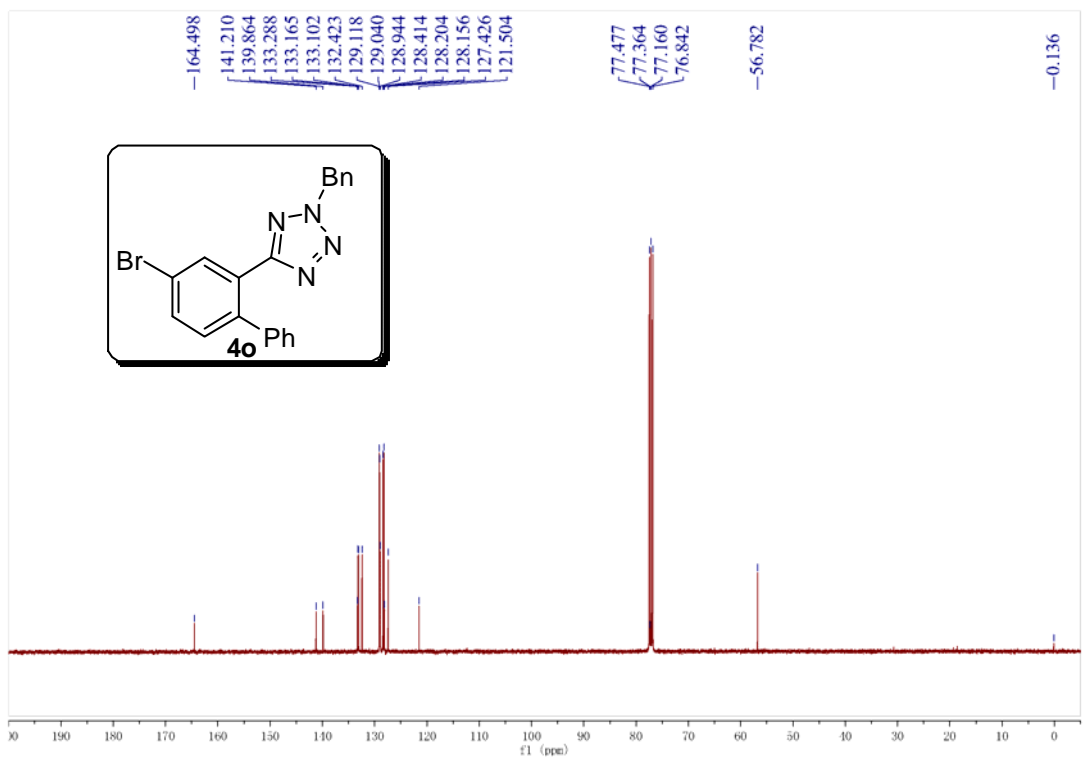

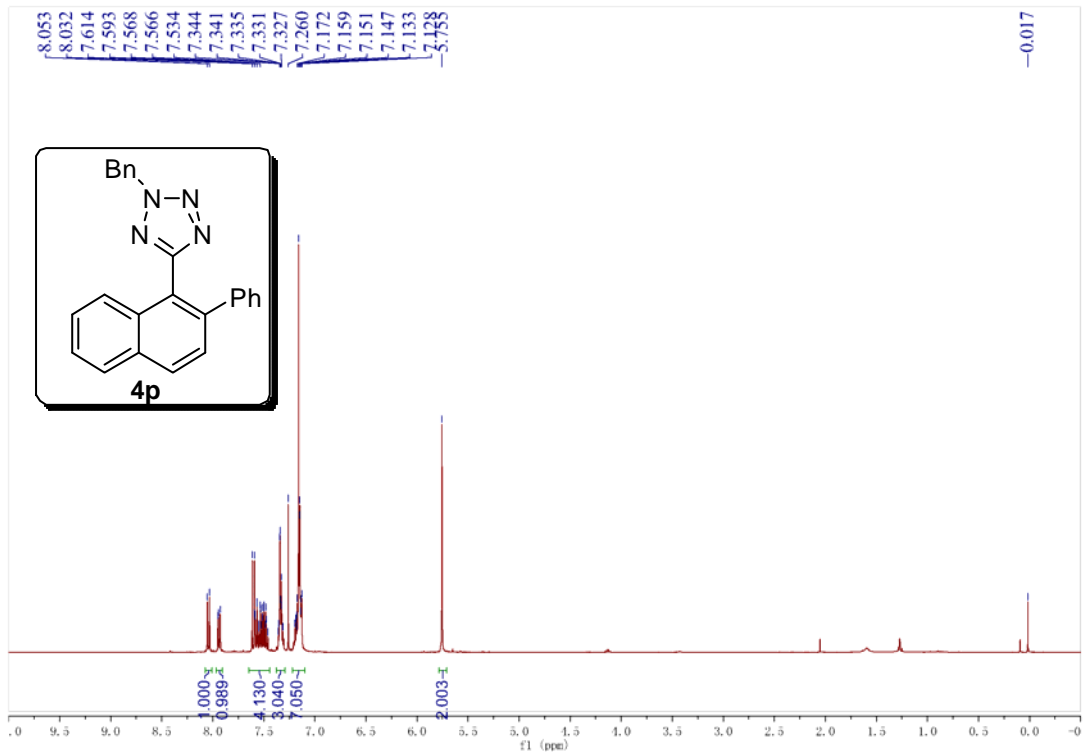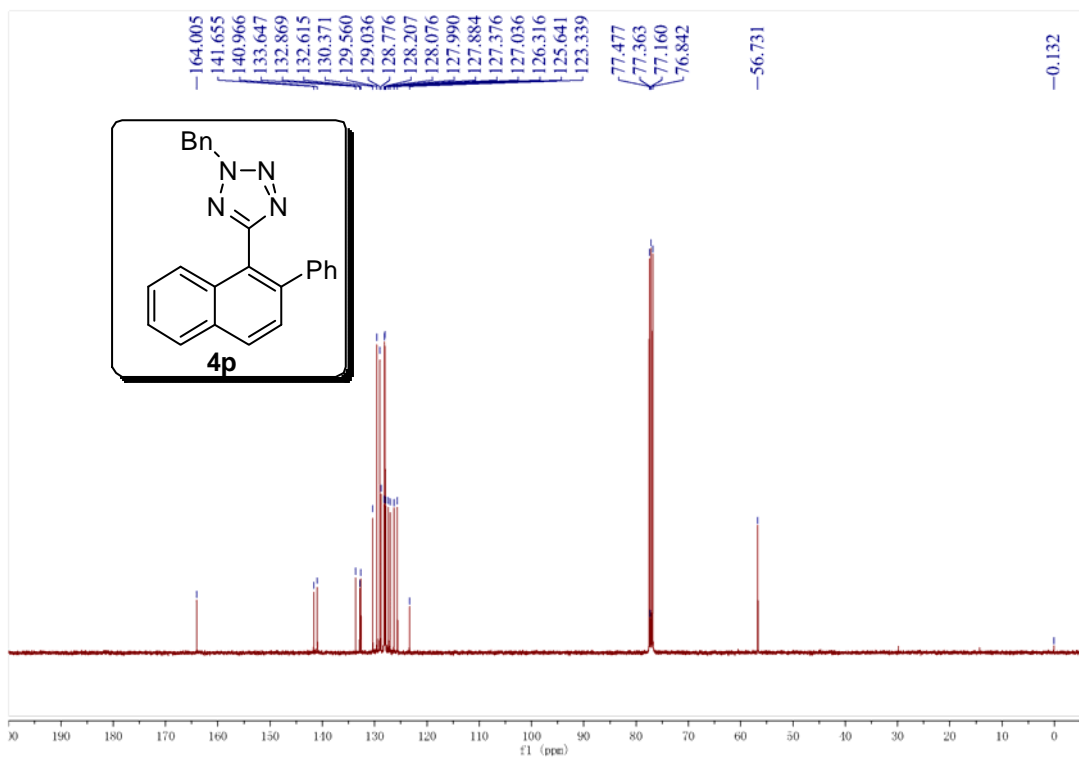

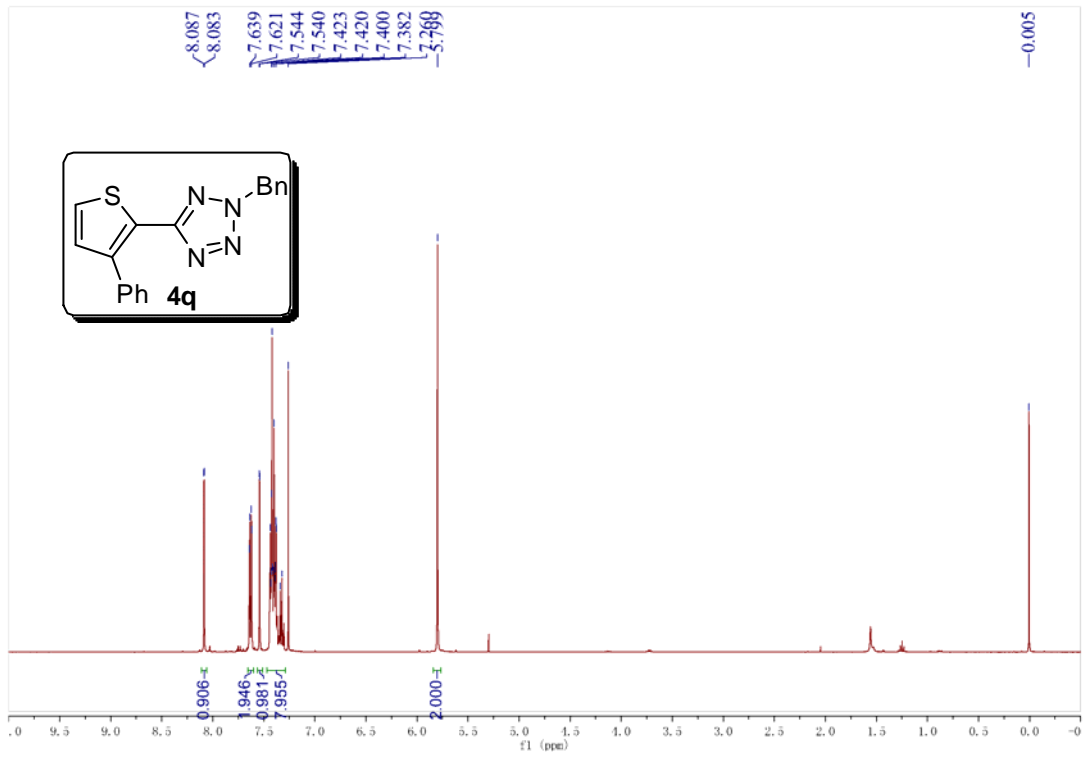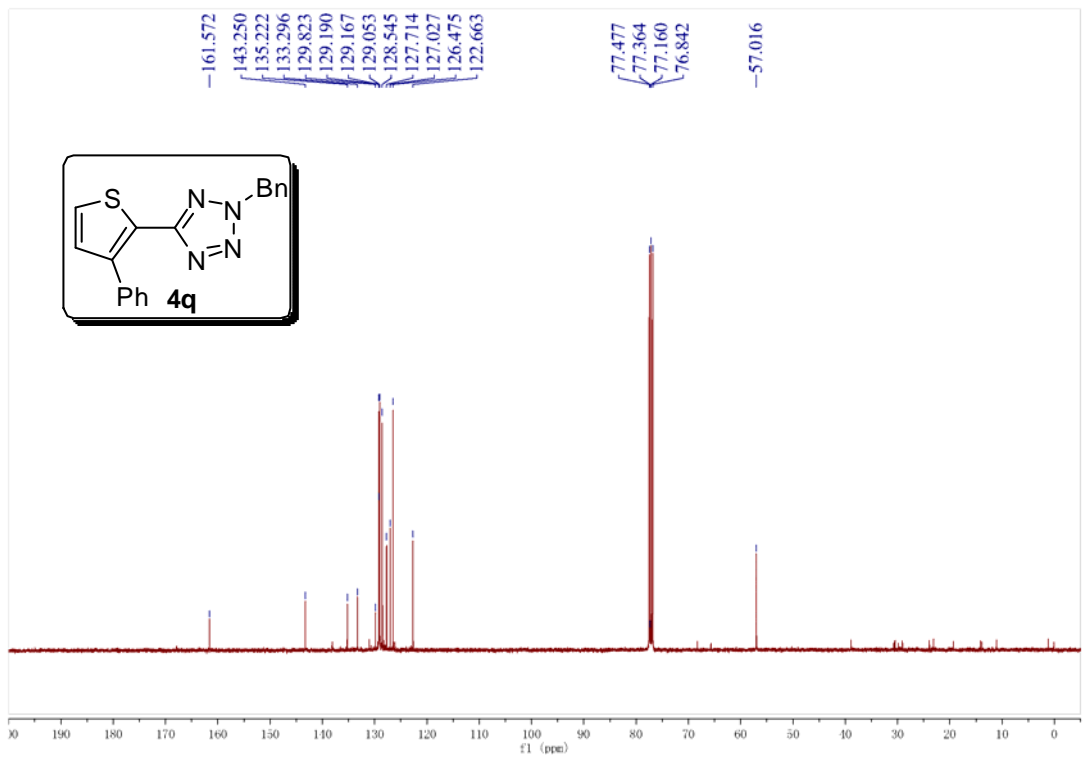

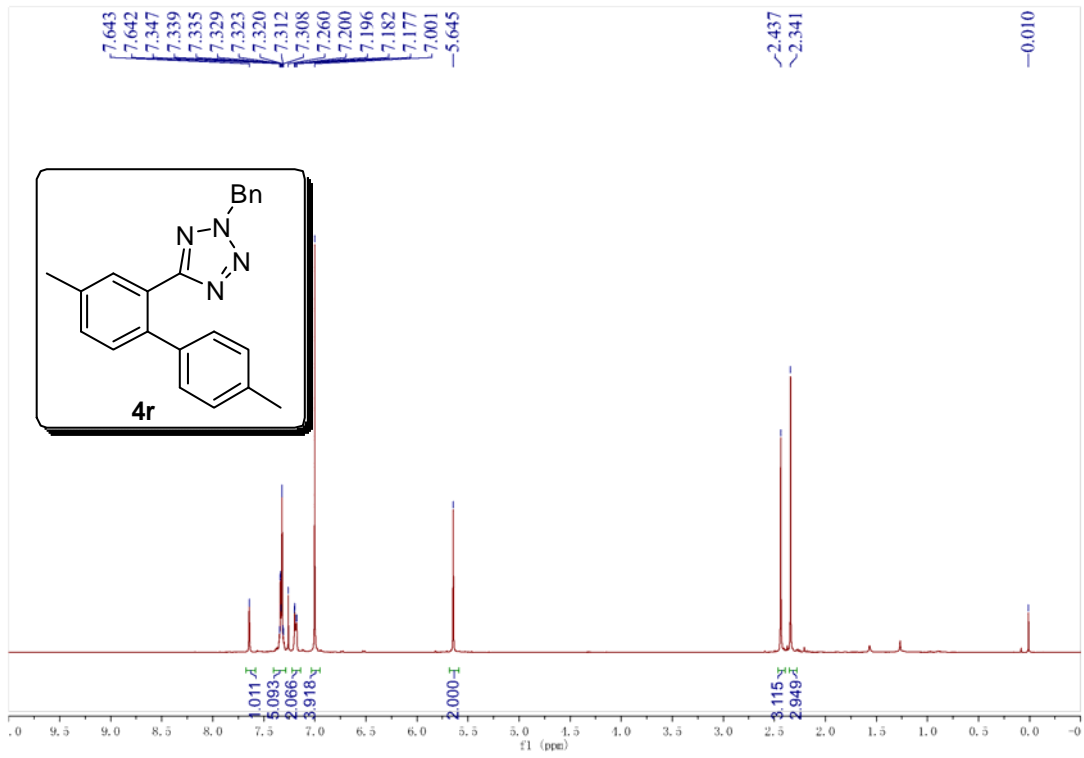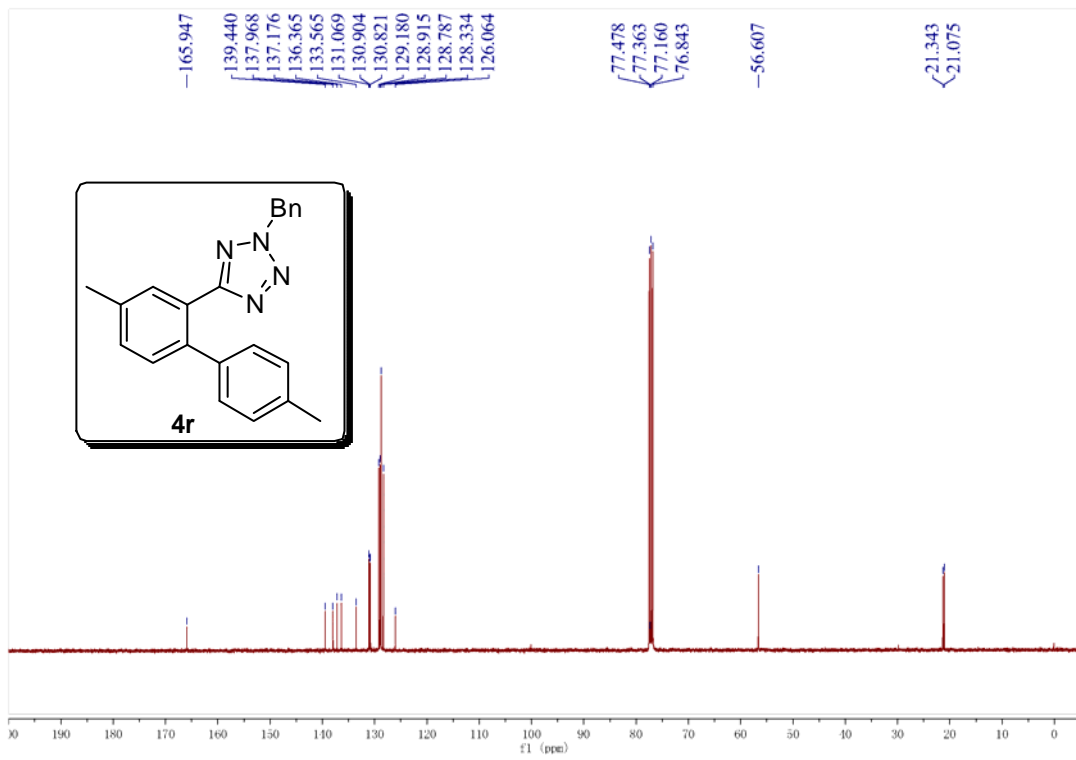

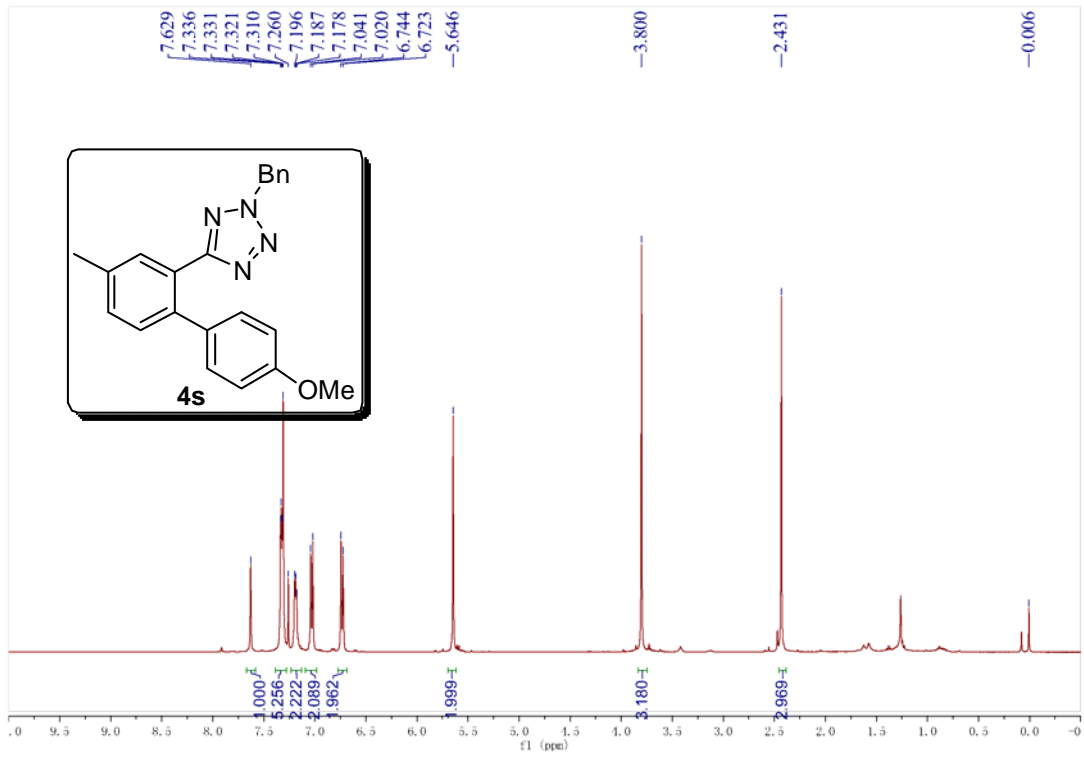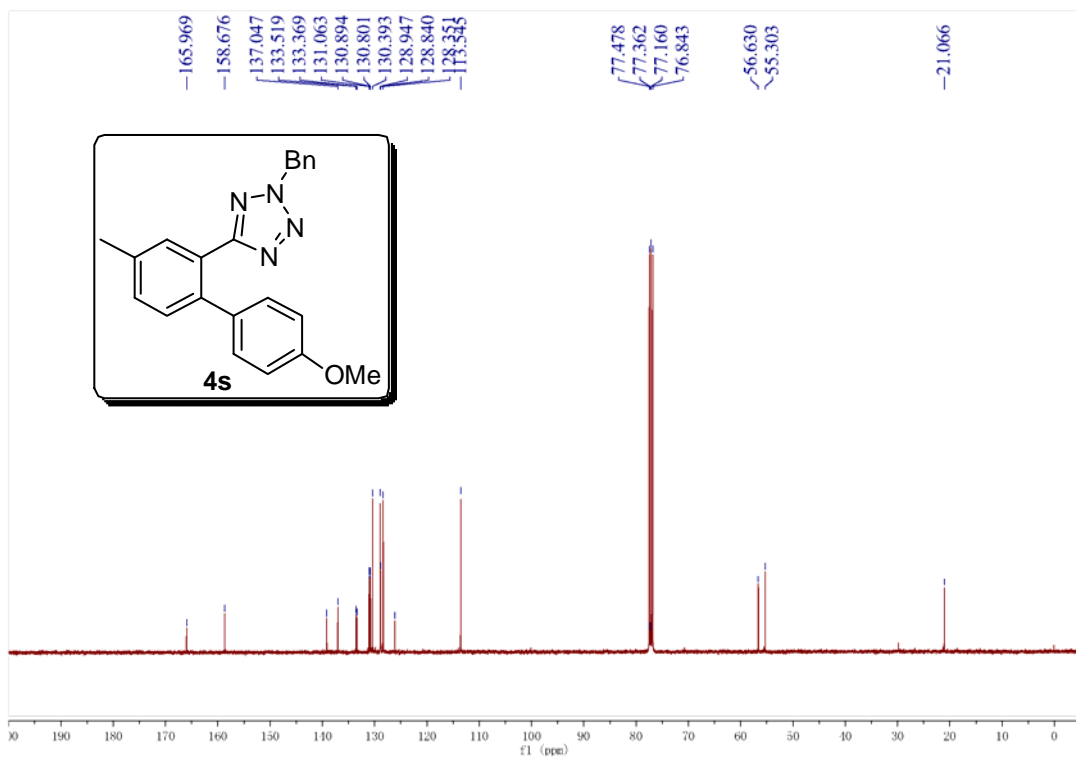

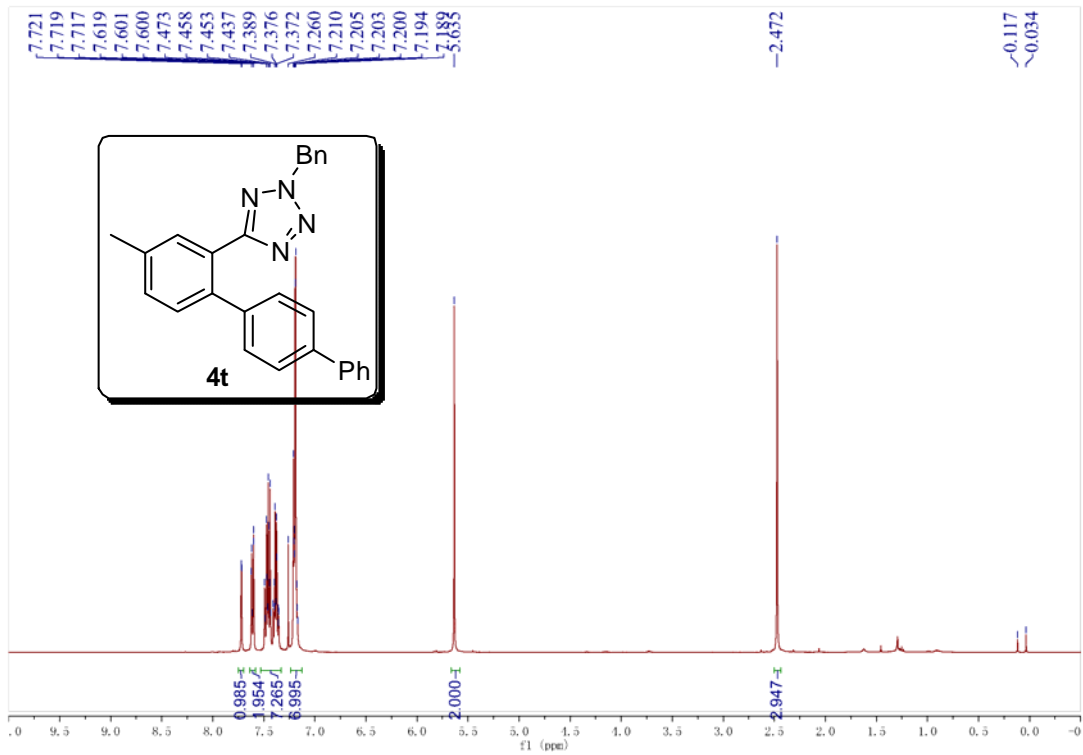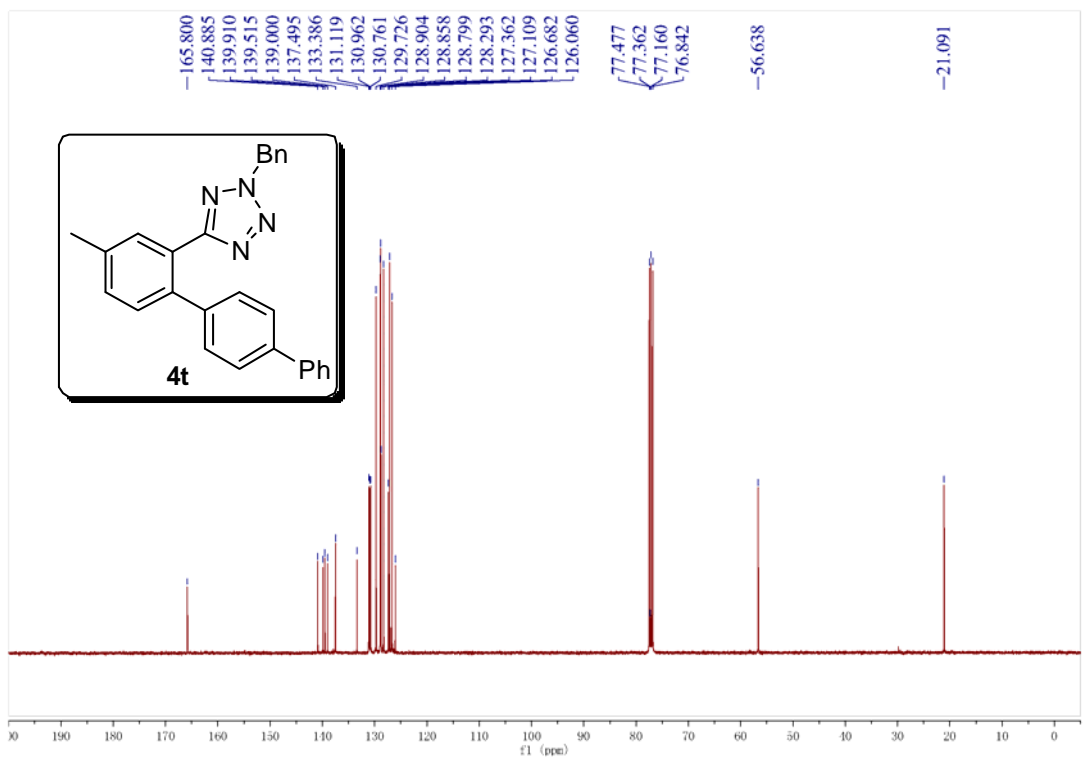



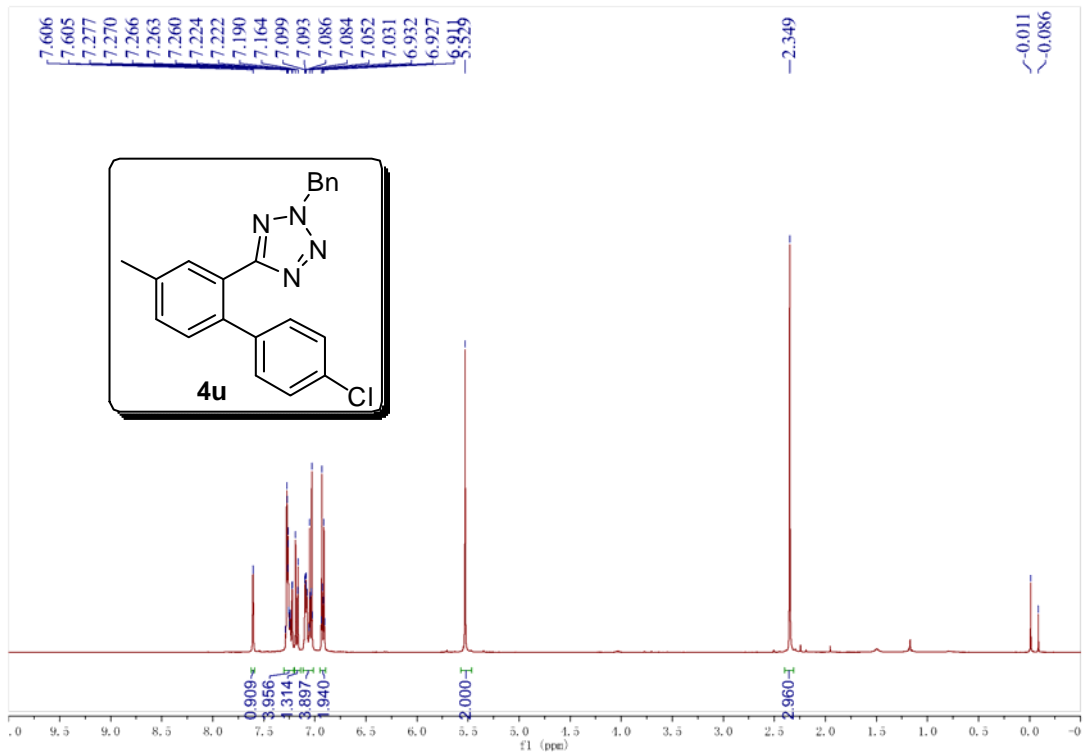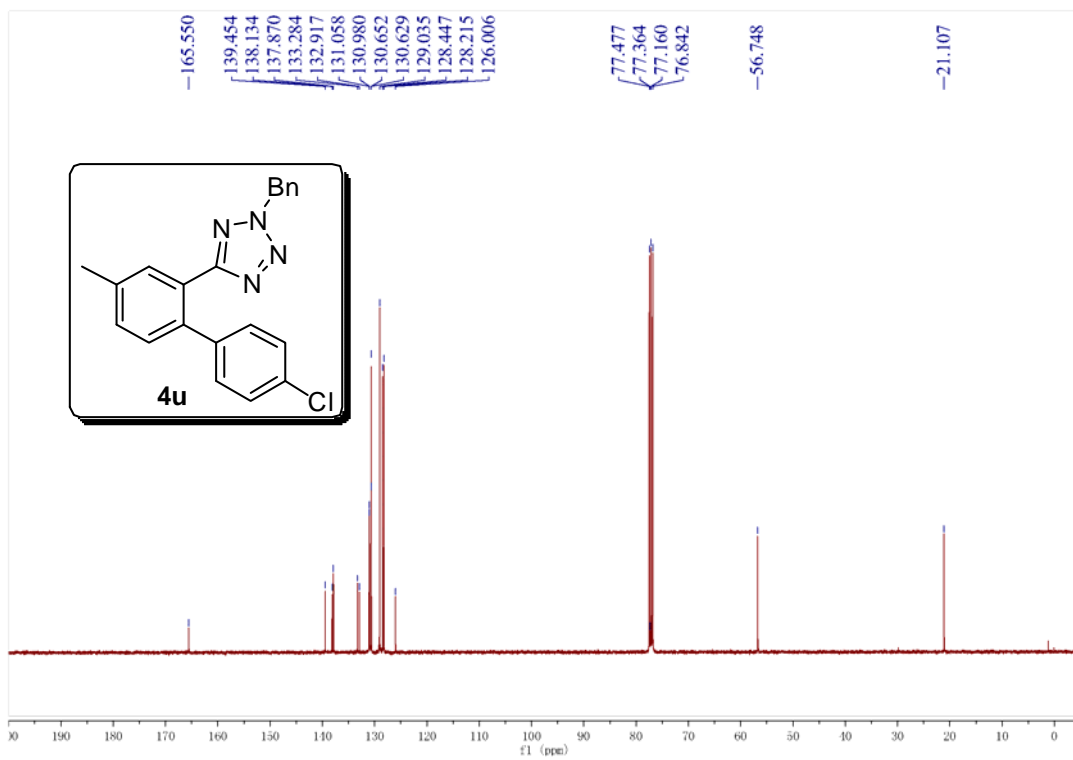

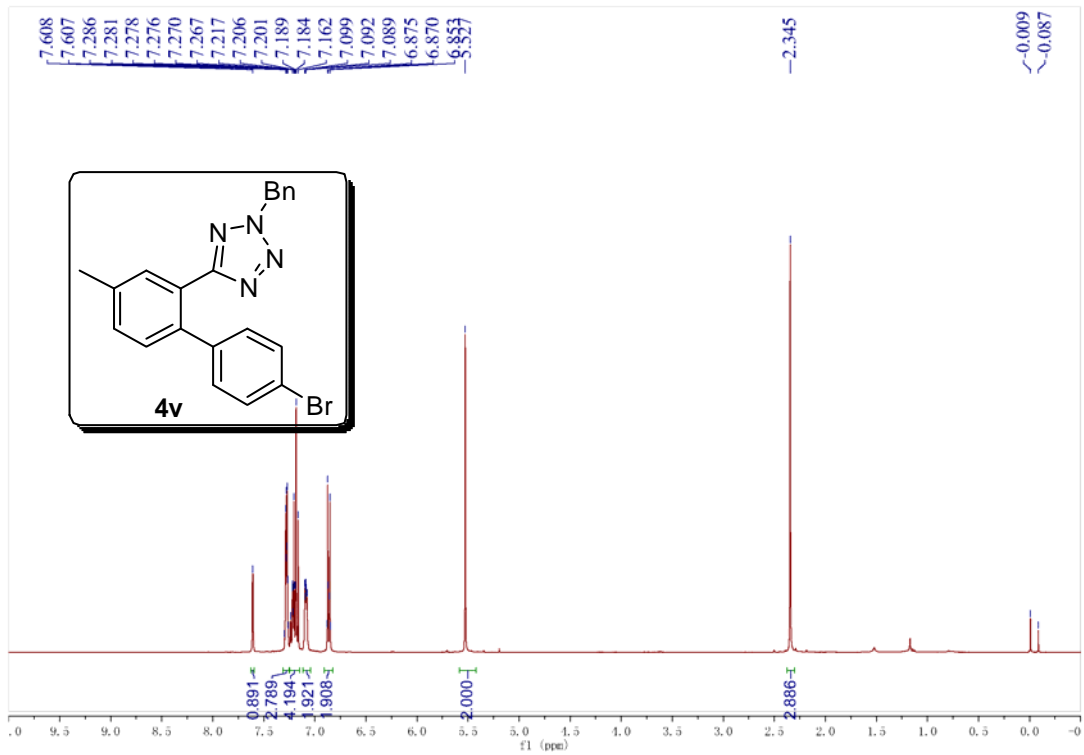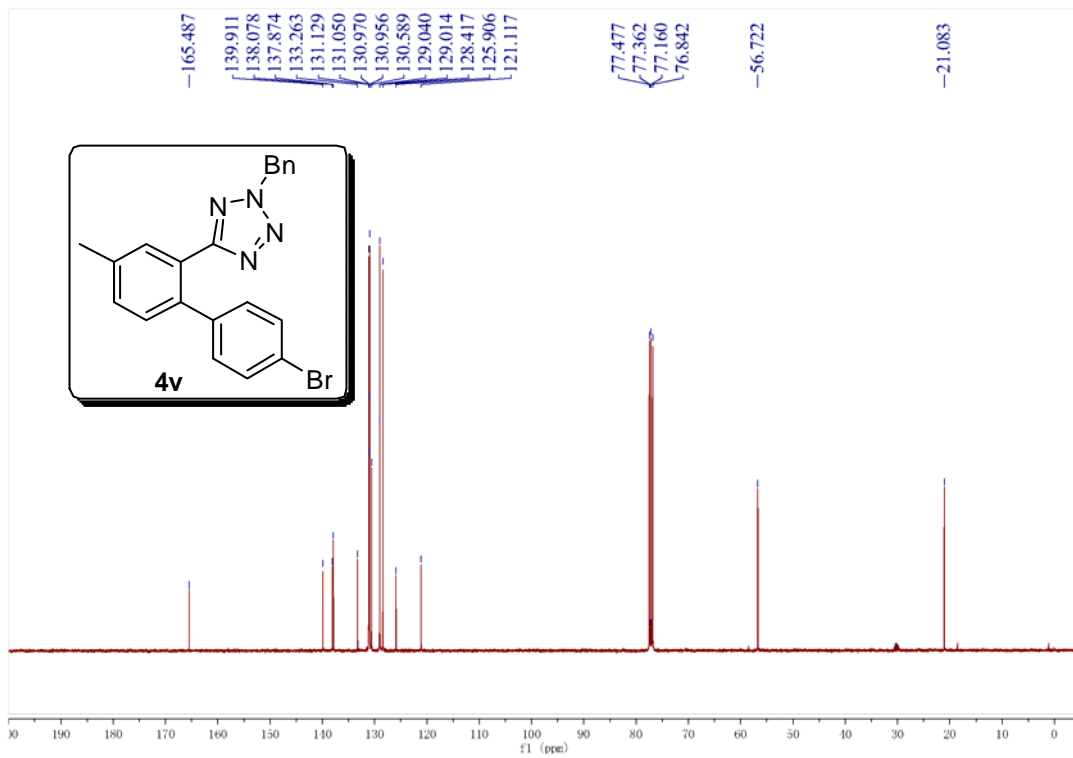

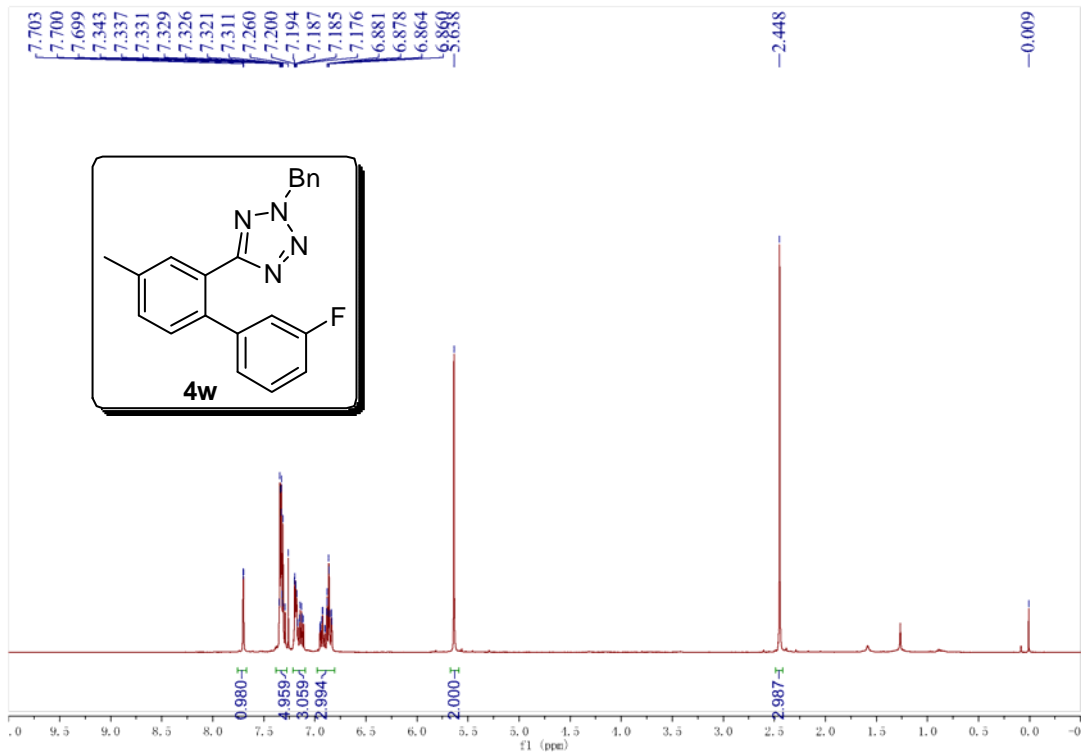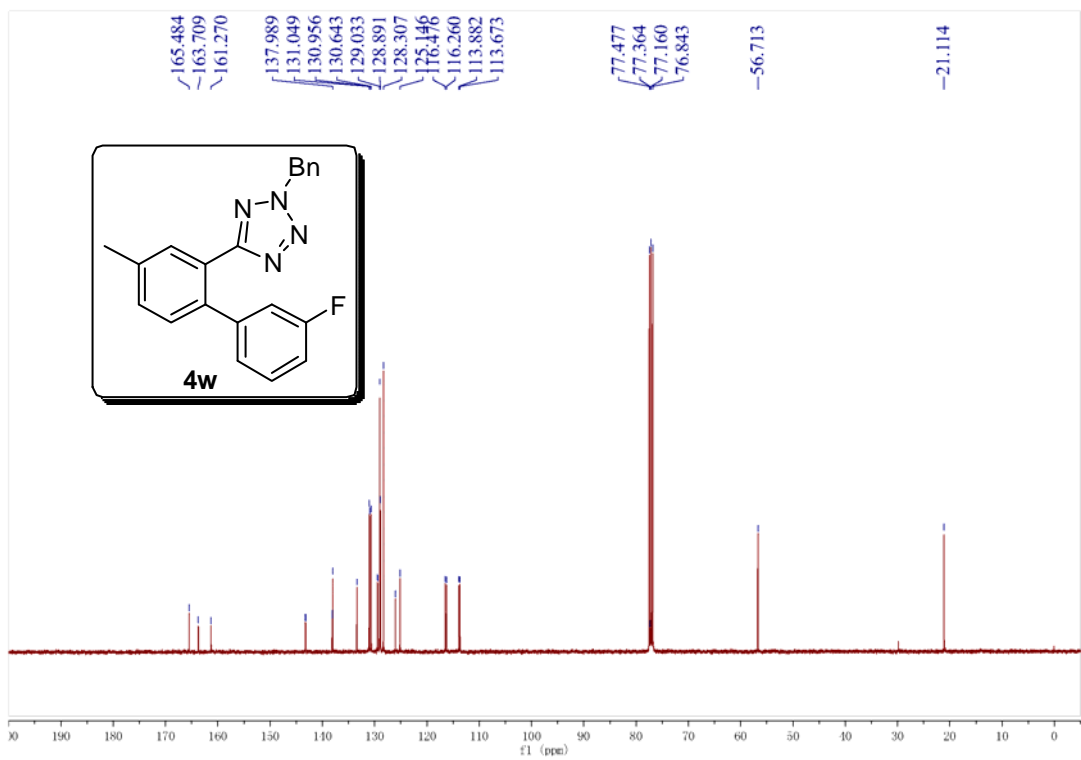

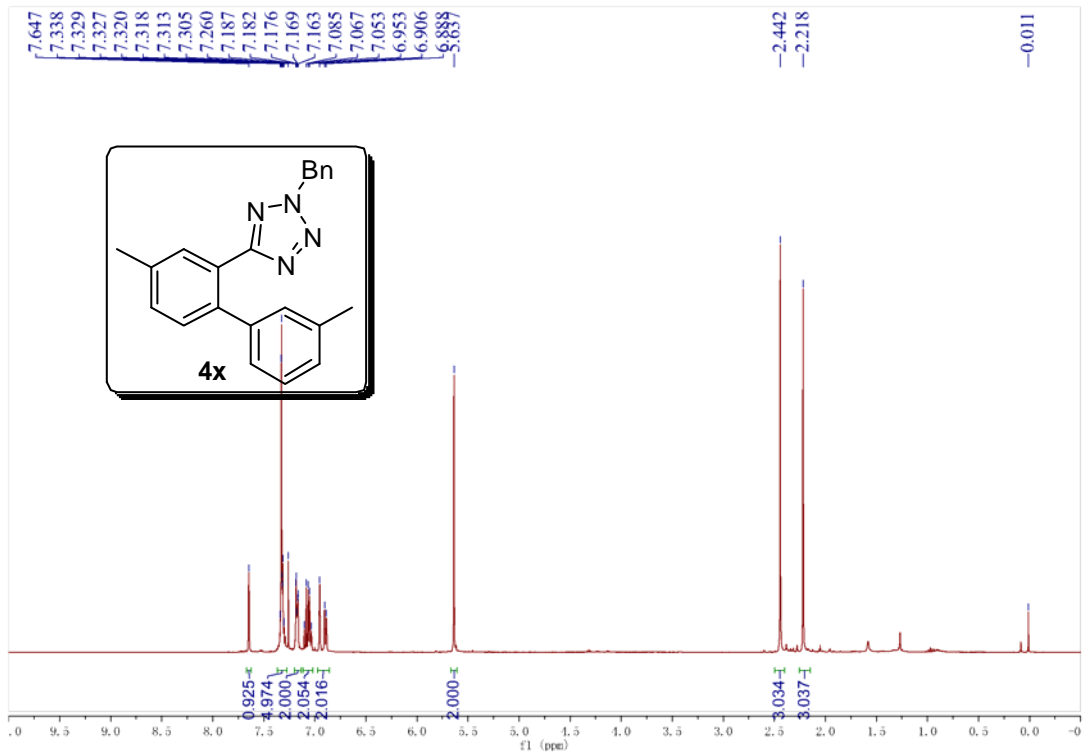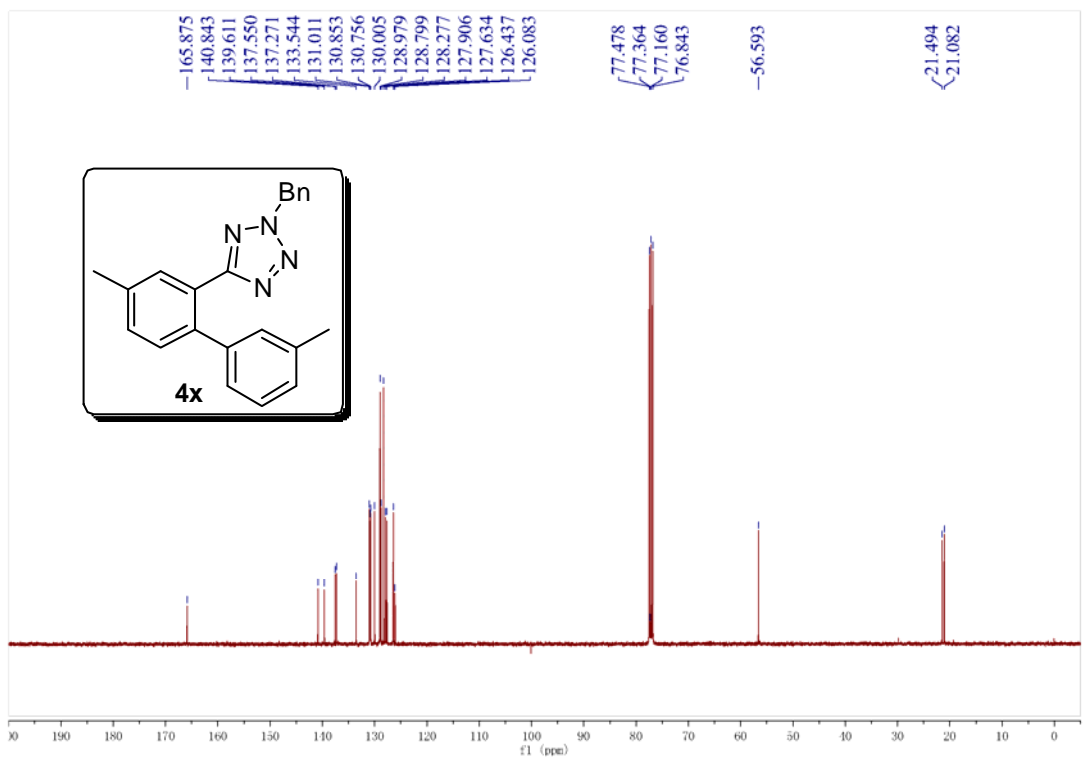

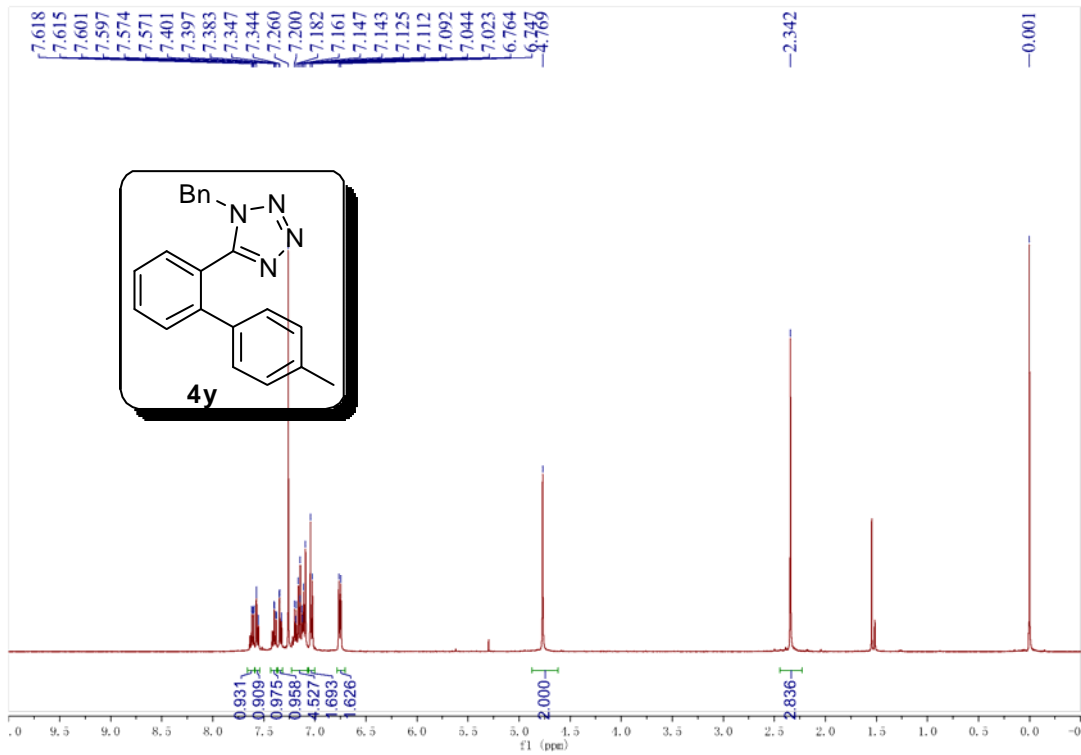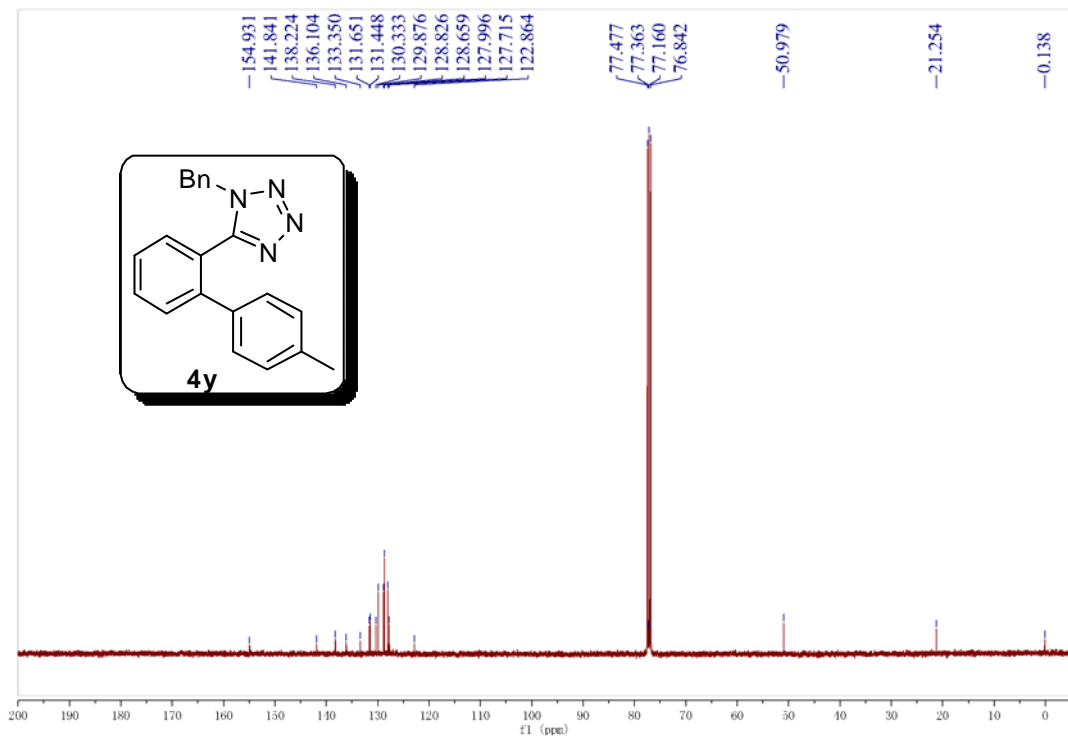

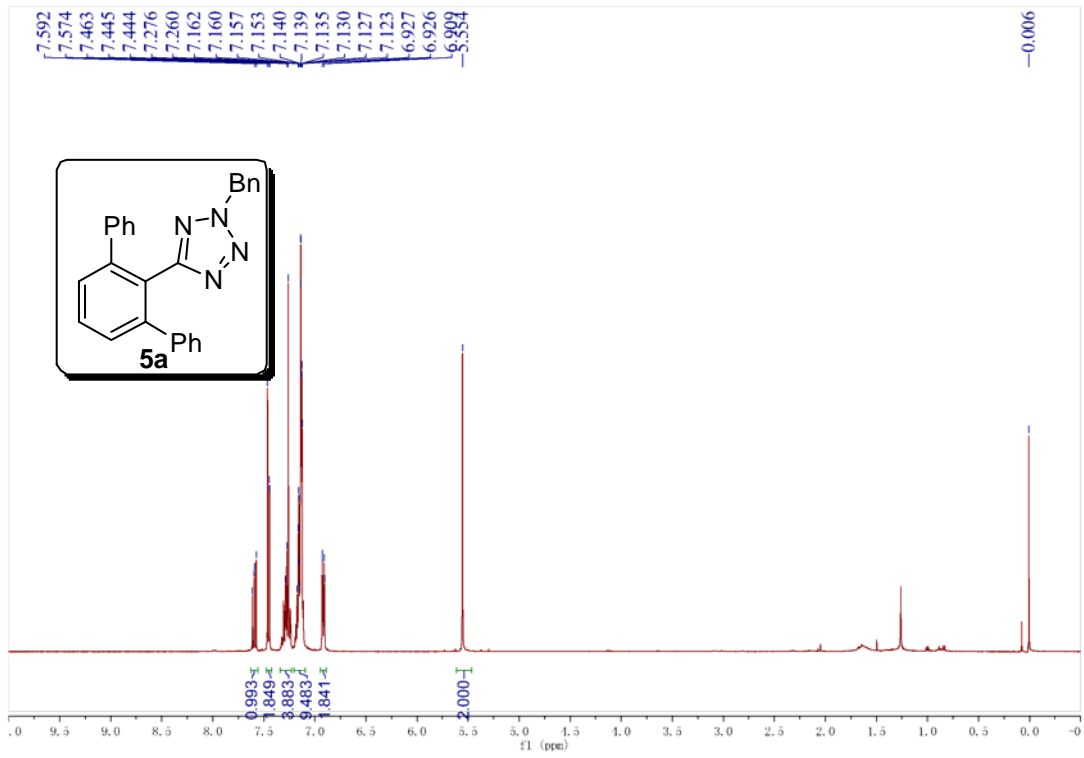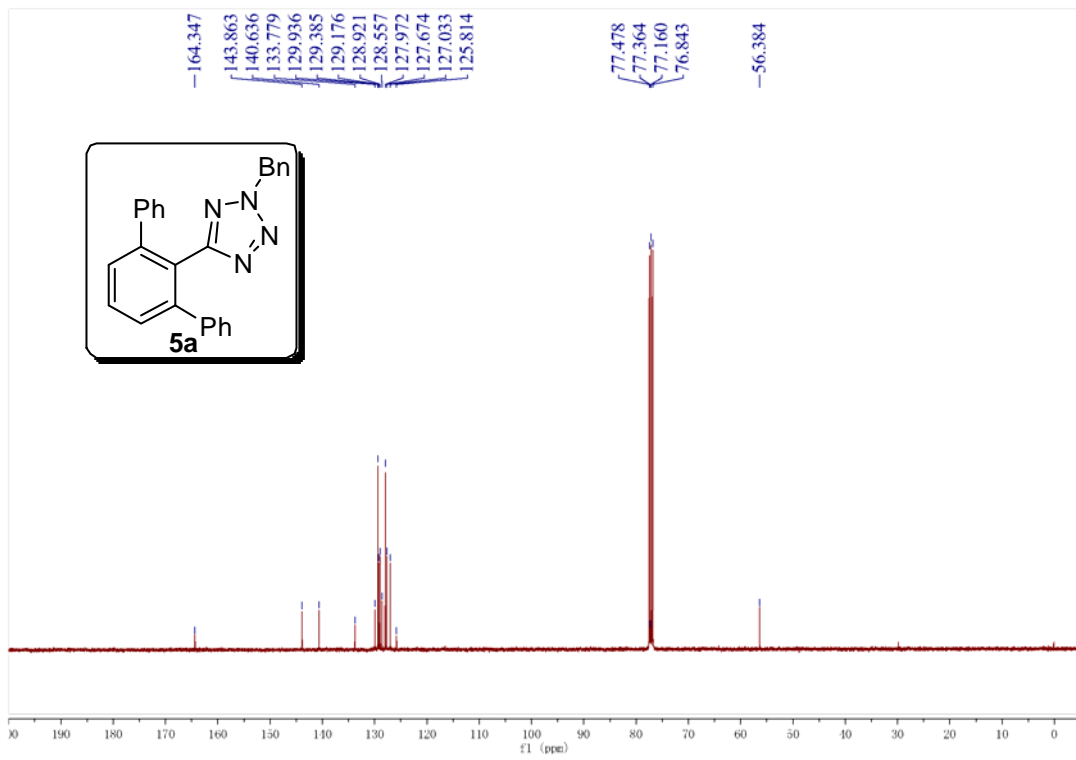

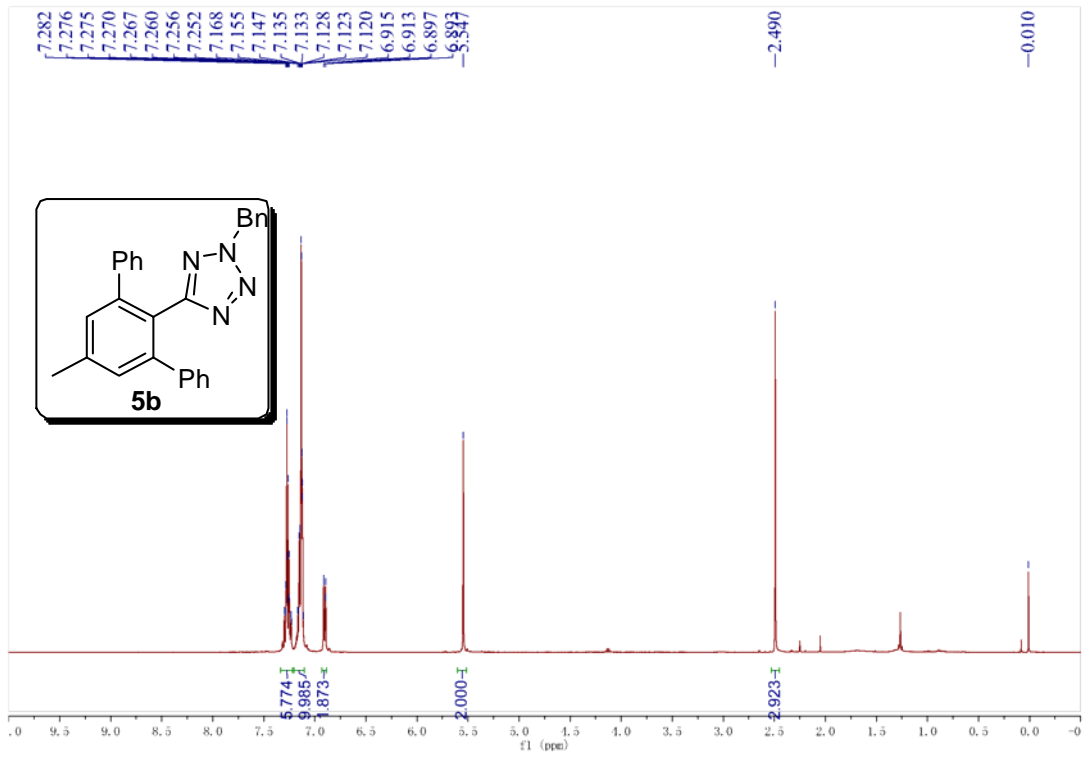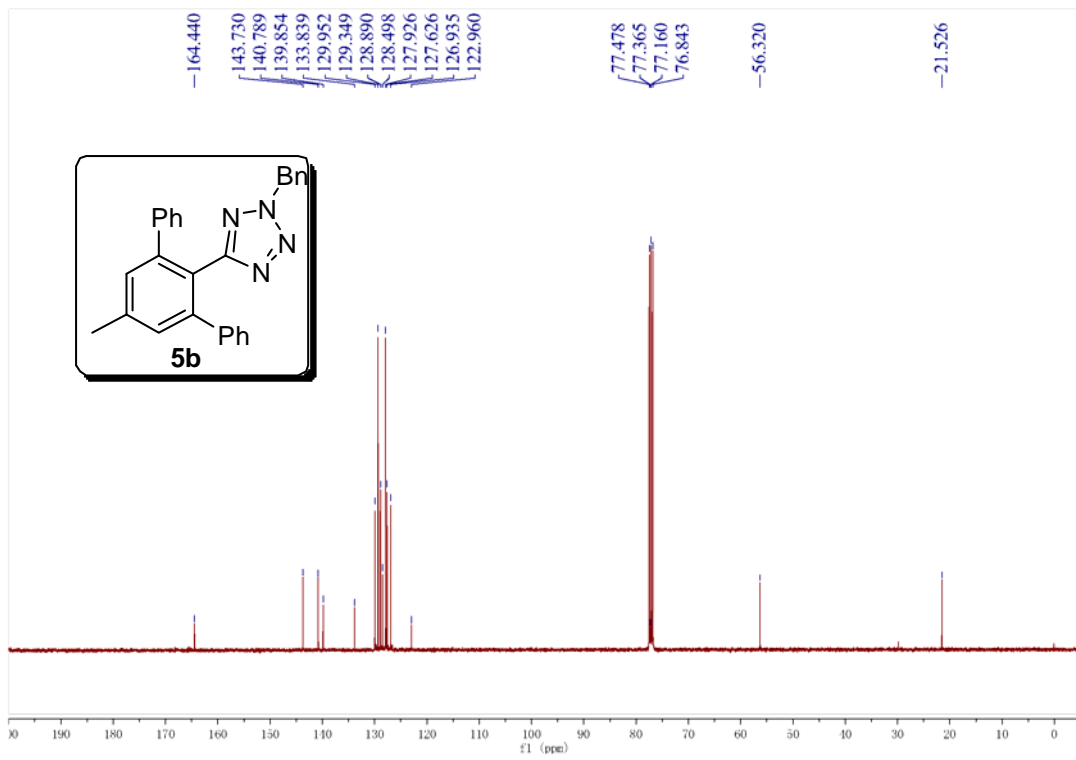

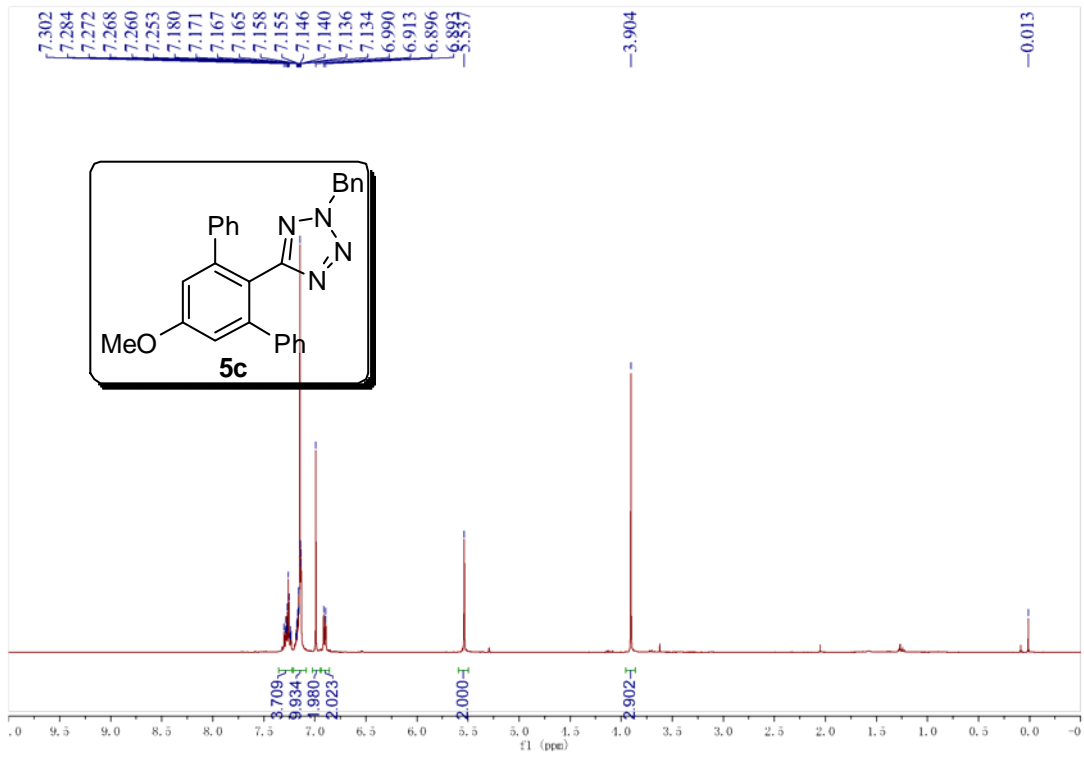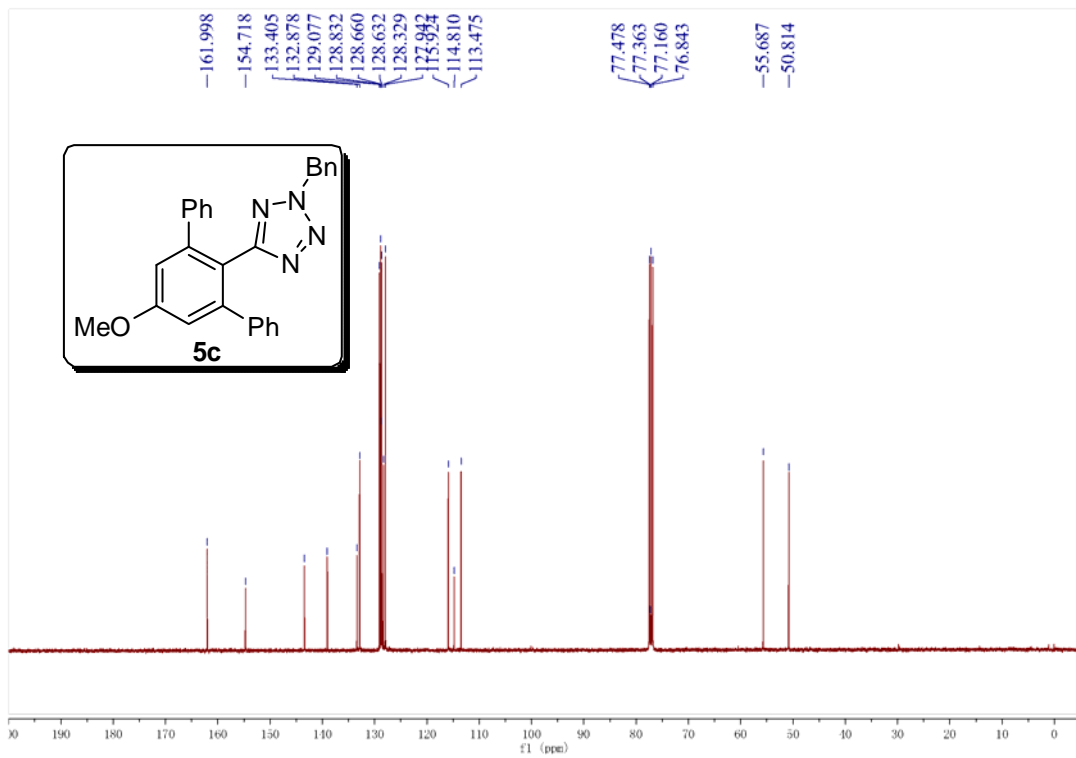



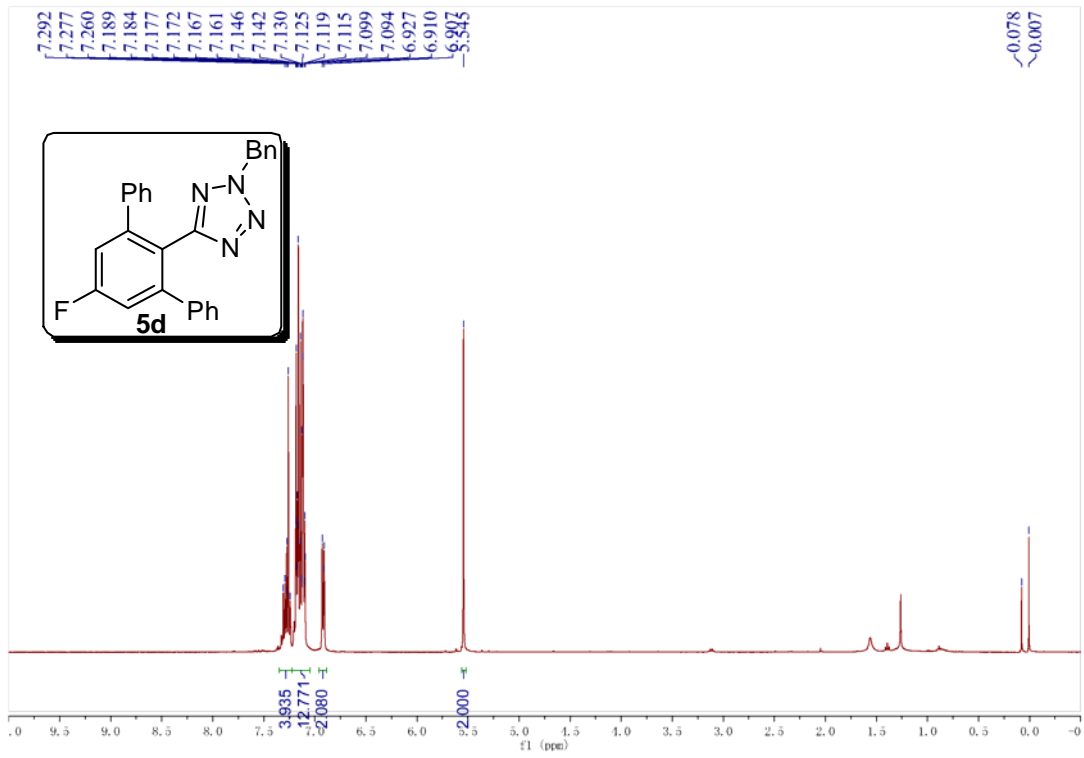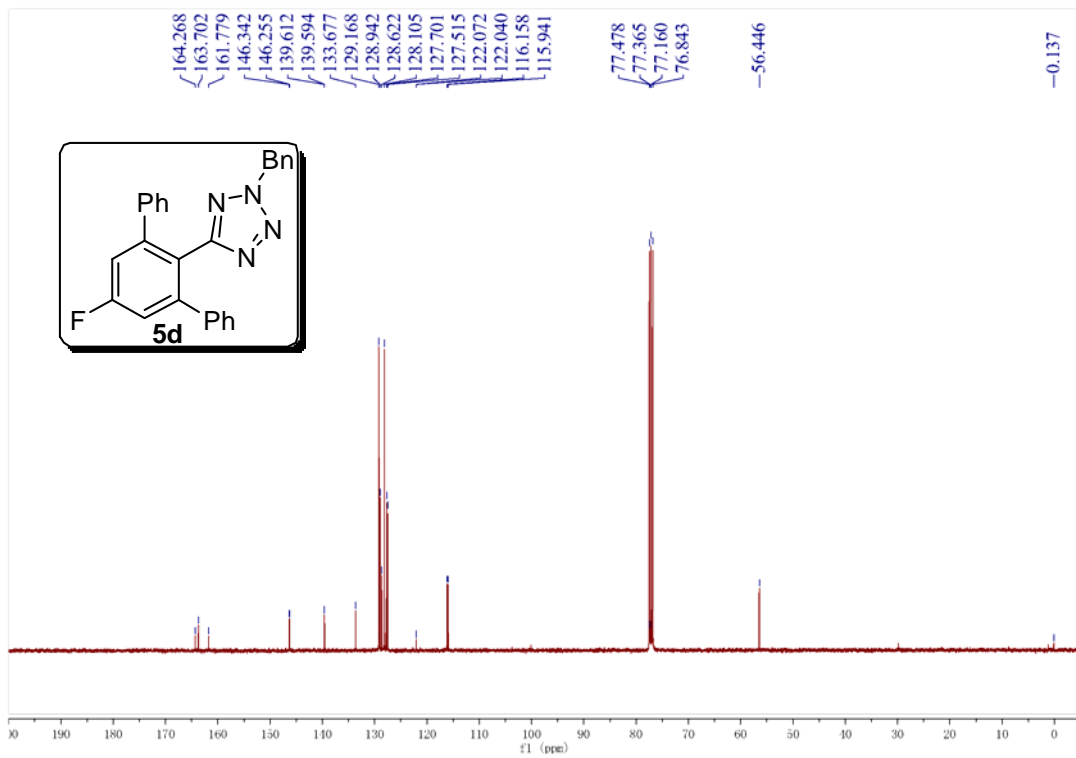

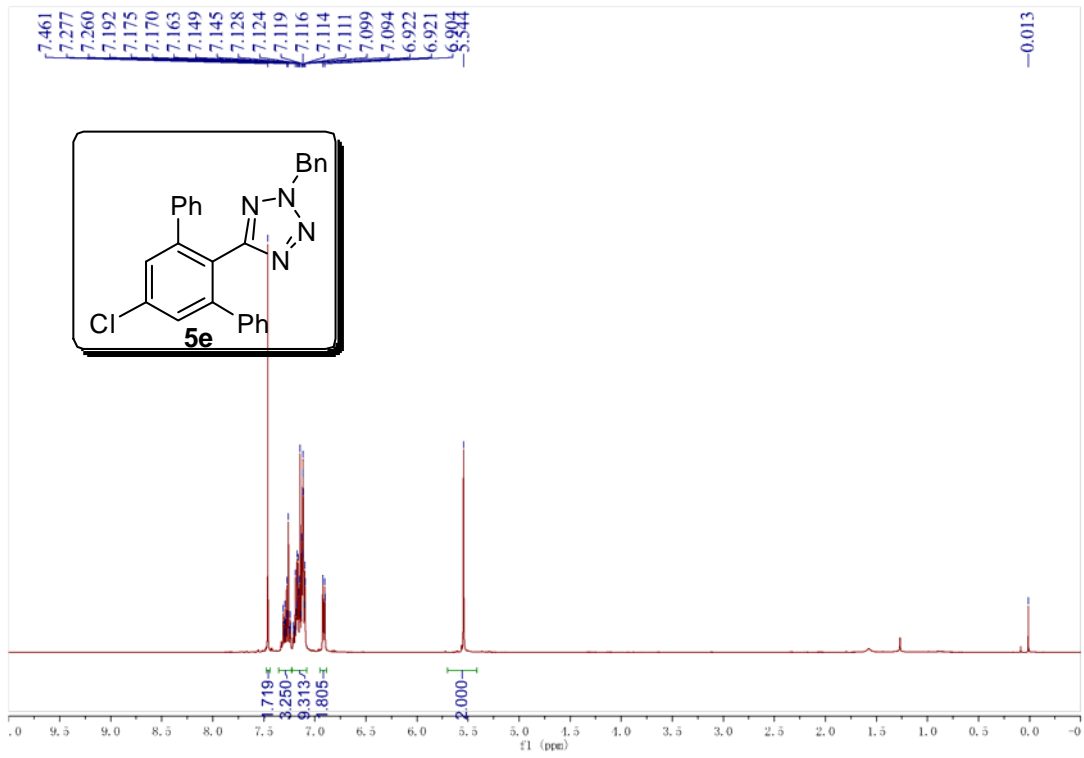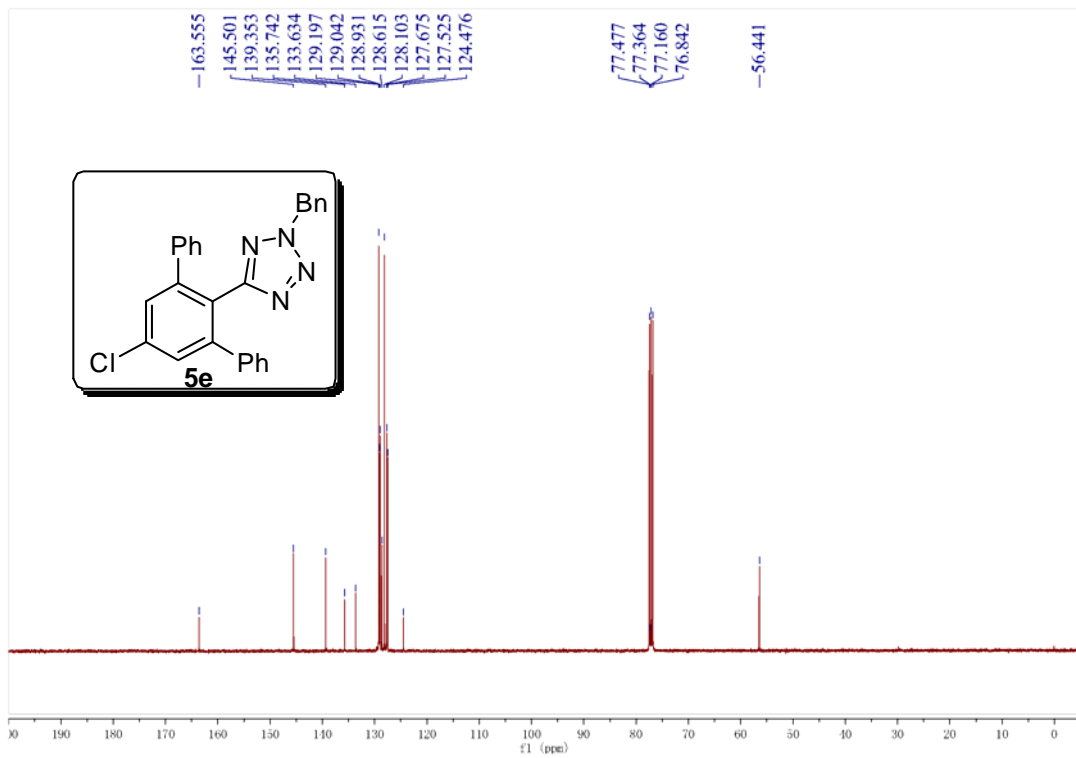

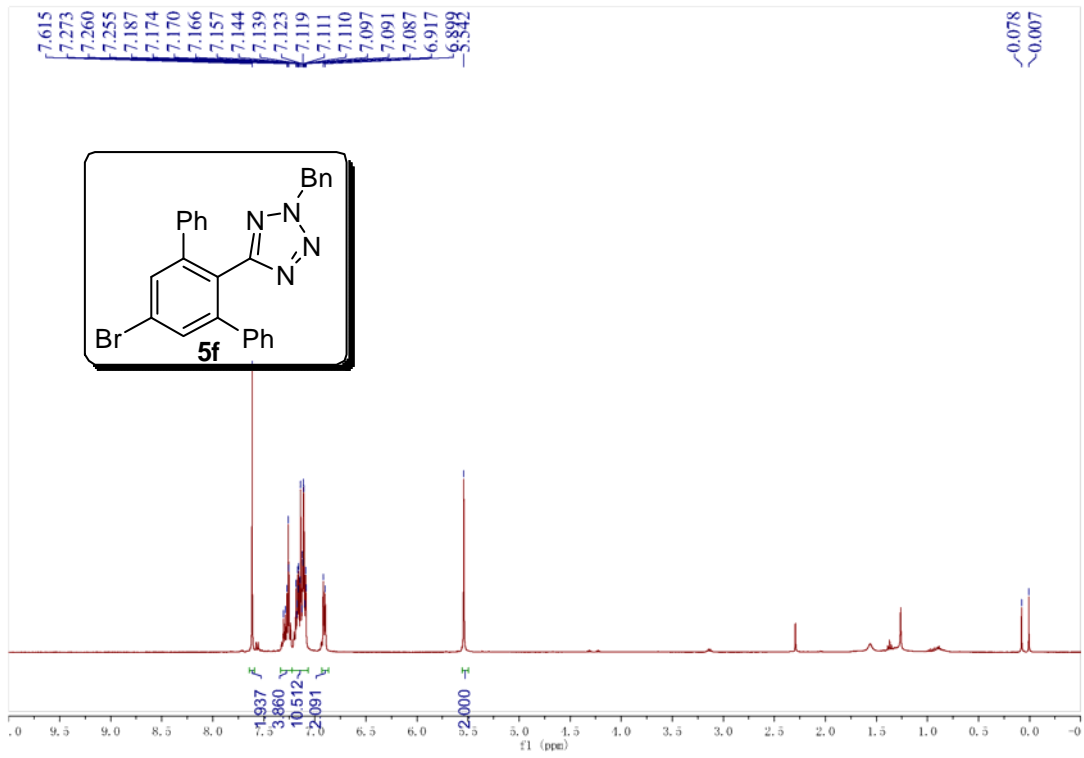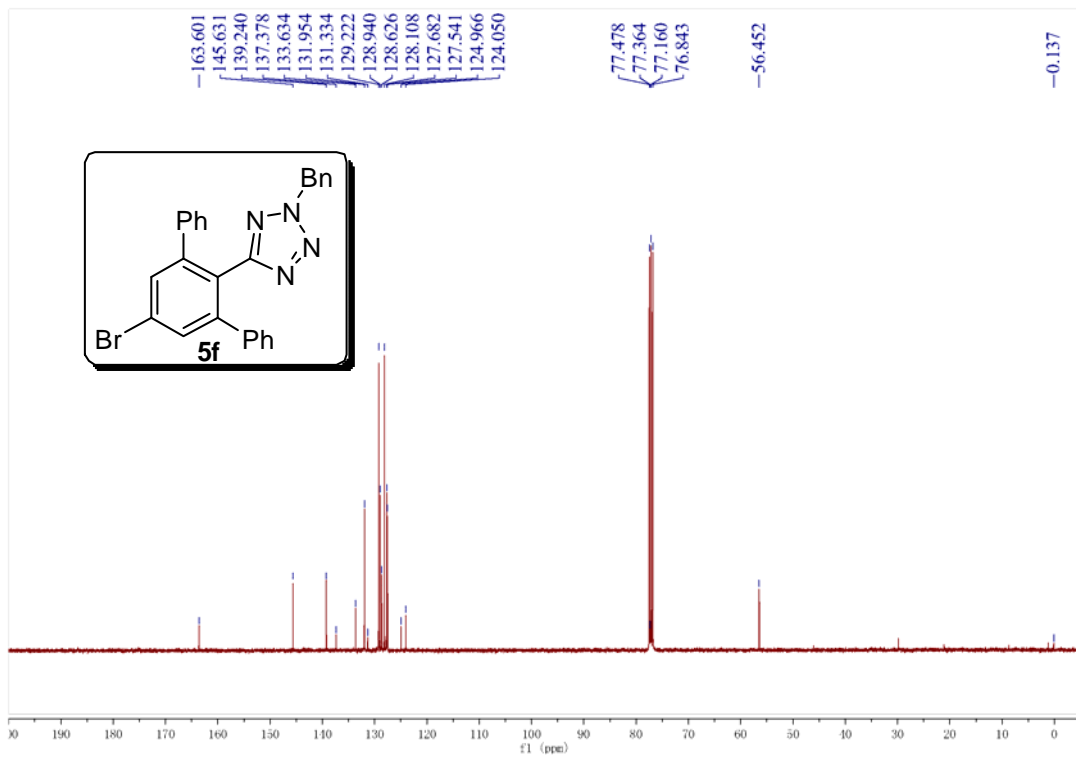

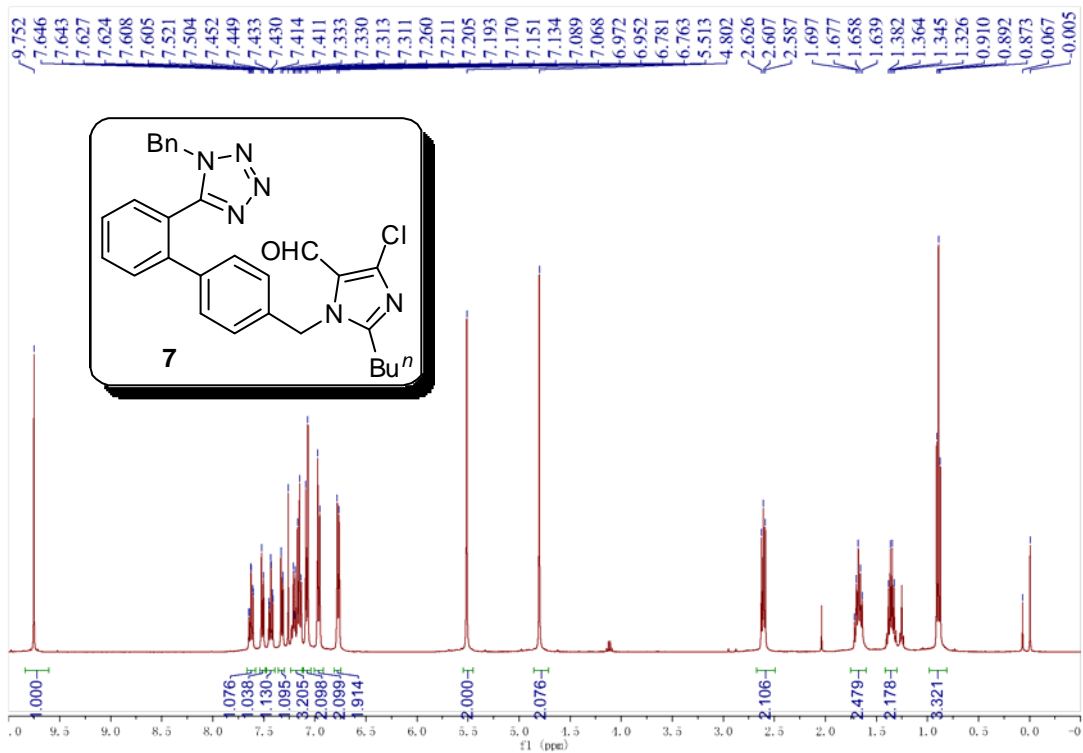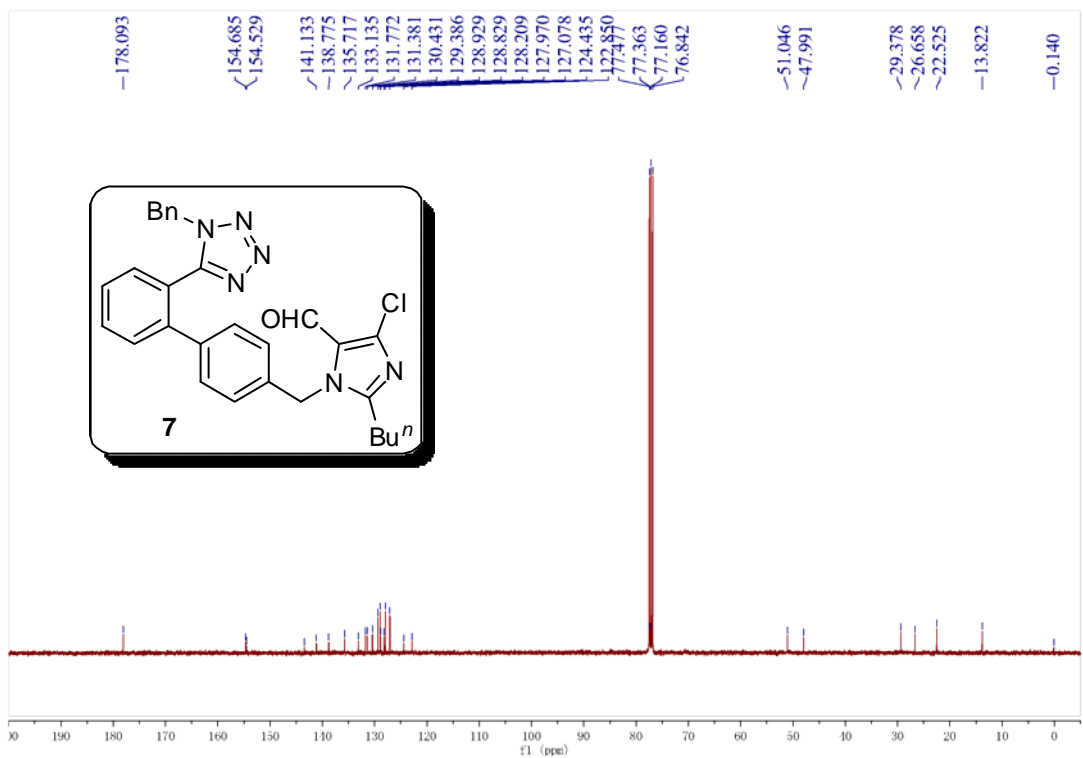

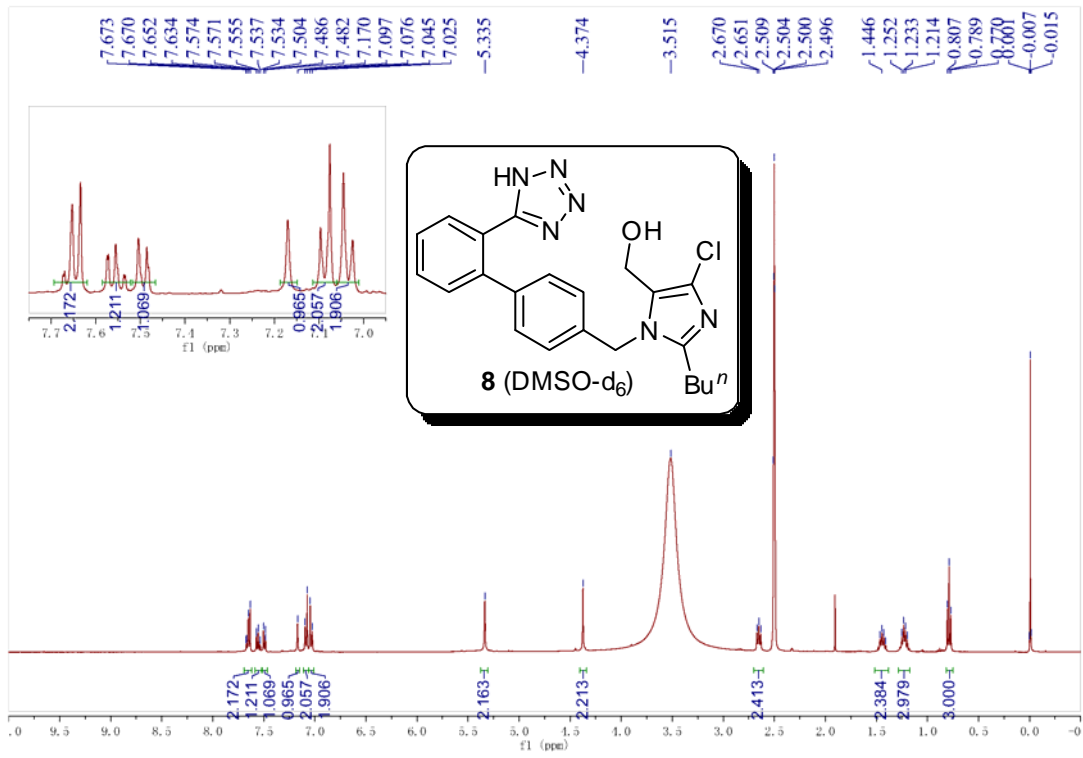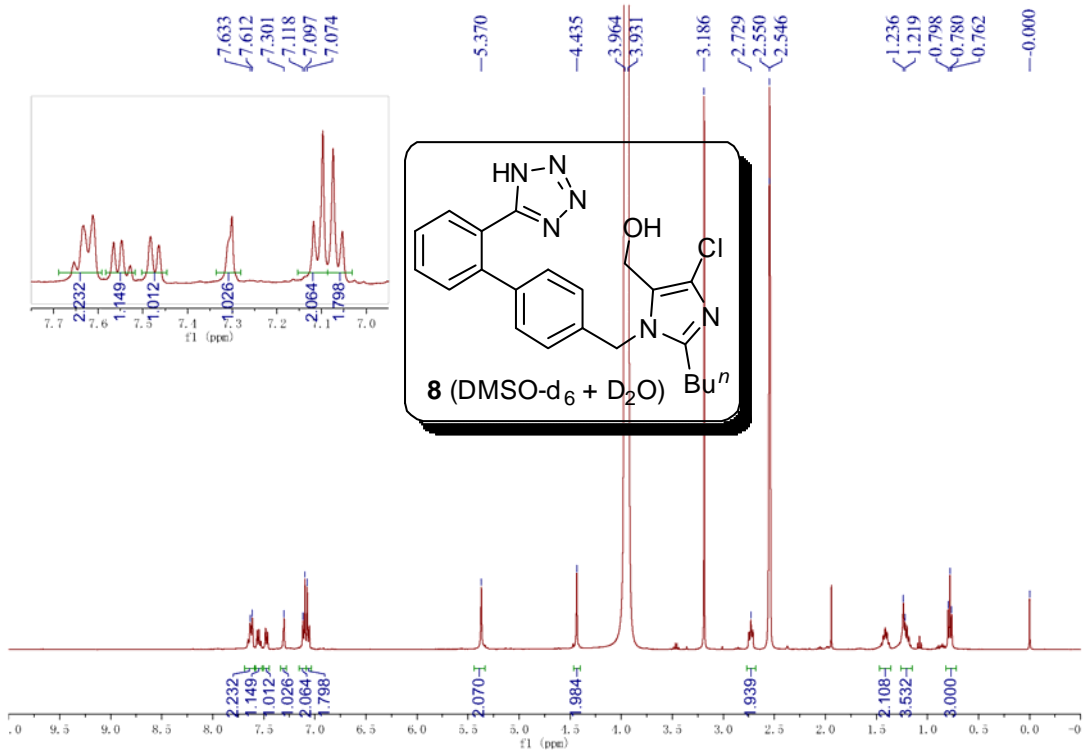

Supplement: c4ob02453b1.pdf [file c4ob02453b1.pdf]
